# Supplementary material for: Quantitative ‘Omics Analyses of Medium Chain Length Polyhydroxyalkanaote Metabolism in Pseudomonas putida LS46 Cultured with Waste Glycerol and Waste Fatty Acids
Source: PubMed Central journal article supplement (PMC4636370; doi:10.1371/journal.pone.0142322), 2015-11-06
Supplement: pone.0142322.s001.pdf [file pone.0142322.s001.pdf]

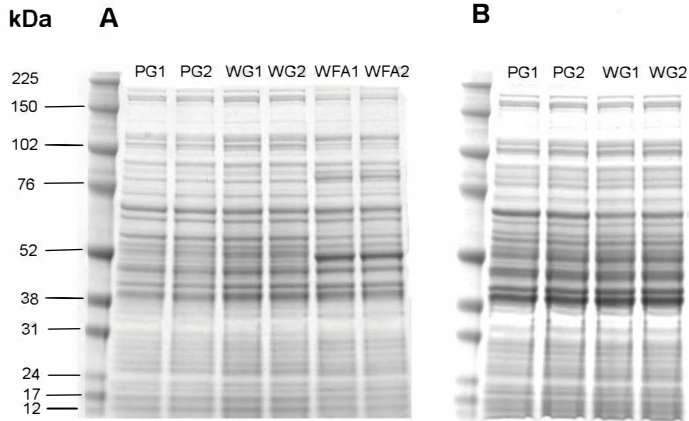

**S1. Fig: SOS-PAGE of total protein of *Pputida* LS46 grown under exponential phase (A) of waste glycerol and waste fatty acids culture, and stationary phase (B) of waste glycerol culture.**

WG: waste glycerol; WFA: waste fatty acids; Numbers indicate two biological replicate.

Protein samples from Pure glycerol (PG) culture under exponential and stationary phase were ran as reference.
