# Supplementary material for: Quantitative ‘Omics Analyses of Medium Chain Length Polyhydroxyalkanaote Metabolism in Pseudomonas putida LS46 Cultured with Waste Glycerol and Waste Fatty Acids
Source: PubMed Central journal article supplement (PMC4636370; doi:10.1371/journal.pone.0142322), 2015-11-06
Supplement: pone.0142322.s002.pdf [file pone.0142322.s002.pdf]

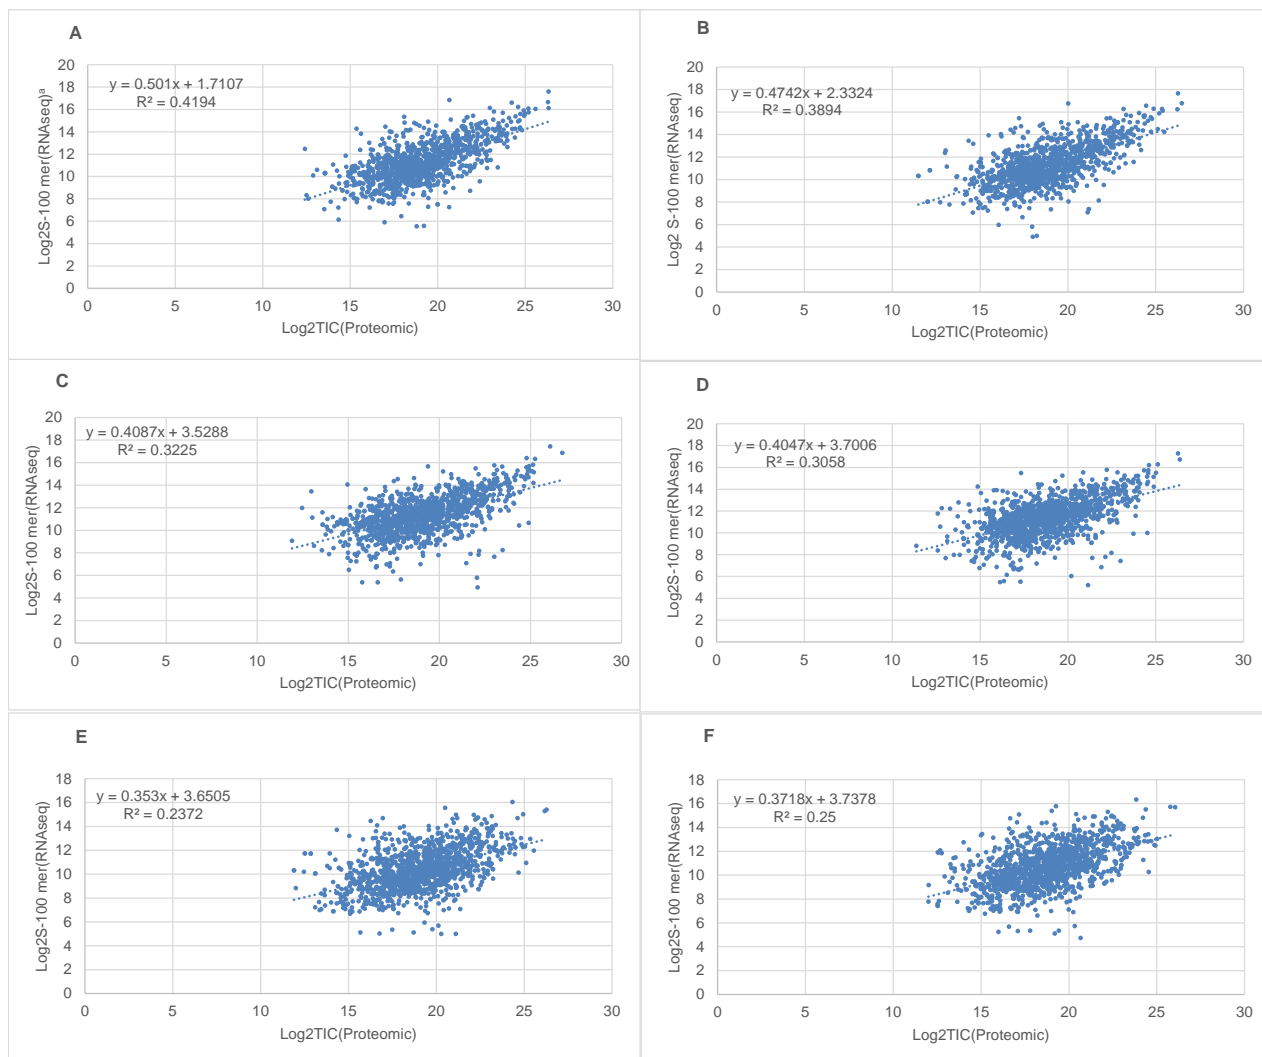

**S2. Fig: Correlation of log(2) expression values of transcriptomic and proteomic of two biological replicates under the three experimental conditions.**

<sup>a</sup>. Sum of total 100-mer alignment per gene; Panel A/B: Waste fatty acids exponential phase culture biological replicate 1 and 2; Panel C/D: Waste glycerol exponential phase culture biological replicate 1 and 2; Panel E/F: Waste glycerol stationary phase culture biological replicate 1 and 2.
