# Supplementary material for: Quantitative ‘Omics Analyses of Medium Chain Length Polyhydroxyalkanaote Metabolism in Pseudomonas putida LS46 Cultured with Waste Glycerol and Waste Fatty Acids
Source: PubMed Central journal article supplement (PMC4636370; doi:10.1371/journal.pone.0142322), 2015-11-06
Supplement: pone.0142322.s003.pdf [file pone.0142322.s003.pdf]

**S1 Table: Proteomics analysis of *P. putida* LS46 gene expression value under three studied experimental conditions.**

a: Log2TIC value of proteins (if detected). Values from two biological replicates derived from three experimental conditions (see method part of the paper) were given.  
 b: A positive Pnet value indicated the up-regulation of the protein under the specific set of comparing conditions (see below 1/2), whereas negative Pnet value indicates the down-regulation of the protein. Wherever no Pnet value associated for a gene, means the protein was not detected in one or both comparing conditions.  
 c: Signal to Noise ratios of individual protein under two comparing conditions; proteins with a S/N value 2.8 or greater having a false discovery rate (FDR) 10% or less.  
 1: Differential protein expression values between waste glycerol stationary culture vs exponential culture  
 2: Differential protein expression value between waste fatty acid exponential culture vs waste glycerol exponential culture

| Gene Annotation | Protein Expression Abundant <sup>a</sup> |         |         |         |          |          | Differential Expression <sup>b</sup> |       | Signal to Noise ratio <sup>c</sup> |       |
|-----------------|------------------------------------------|---------|---------|---------|----------|----------|--------------------------------------|-------|------------------------------------|-------|
|                 | WG_Exp1                                  | WG_Exp2 | WG_Sta1 | WG_Sta2 | WFA_Exp1 | WFA_Exp2 | P1net                                | P2net | S/N 1                              | S/N 2 |
| PPUTLS46_024028 | 26.74                                    | 26.36   | 26.27   | 25.77   | 26.29    | 26.48    | -0.39                                | 0.09  | 4.21                               | 0.73  |
| PPUTLS46_004174 | 26.08                                    | 26.26   | 26.16   | 26.04   | 26.32    | 26.26    | -0.14                                | 0.08  | 0.55                               | 1.15  |
| PPUTLS46_024033 | 25.24                                    | 25.11   | 24.94   | 24.36   | 25.17    | 25.35    | -0.31                                | 0.08  | 2.4                                | 1.19  |
| PPUTLS46_019606 | 25.18                                    | 24.87   | 24.46   | 24.33   | 24.8     | 24.72    | -0.45                                | -0.01 | 3.96                               | 0.39  |
| PPUTLS46_020456 | 25.16                                    | 24.88   | 21.49   | 20.91   | 24.66    | 24.55    | -3.51                                | -0.06 | 18.22                              | 2.43  |
| PPUTLS46_016679 | 25.13                                    | 24.57   | 25.55   | 24.86   | 24.96    | 24.37    | 0.06                                 | 0.21  | 1.11                               | 0.45  |
| PPUTLS46_013648 | 25.08                                    | 24.5    | 24.5    | 24.29   | 24.4     | 24.06    | -0.25                                | -0.06 | 2.83                               | 1.47  |
| PPUTLS46_022581 | 24.91                                    | 24.33   | 25.34   | 25.01   | 24.96    | 24.31    | 0.42                                 | 0.1   | 4.13                               | 0.81  |
| PPUTLS46_022586 | 24.9                                     | 24.56   | 24.84   | 24.92   | 24.43    | 24.78    | 0.16                                 | 0.13  | 0.62                               | 0.71  |
| PPUTLS46_019281 | 24.89                                    | 24.51   | 24.67   | 24.54   | 15.64    | 12.72    | 0.02                                 | -4.99 | 0.95                               | 3.71  |
| PPUTLS46_022151 | 24.88                                    | 24.55   | 24.06   | 23.69   | 24.68    | 25.48    | -0.77                                | 0.11  | 18.29                              | 1.12  |
| PPUTLS46_011220 | 24.86                                    | 23.98   | 24.27   | 23.75   | 23.37    | 24       | -0.08                                | -0.08 | 1.35                               | 1.17  |
| PPUTLS46_024003 | 24.81                                    | 23.73   | 23.37   | 22.75   | 24.18    | 23.52    | -0.71                                | -0.38 | 2.52                               | 0.29  |
| PPUTLS46_015469 | 24.78                                    | 24.61   | 24.33   | 23.83   | 24.58    | 24.87    | -0.45                                | 0.06  | 3.63                               | 0.9   |
| PPUTLS46_016669 | 24.77                                    | 25.01   | 25.04   | 24.68   | 25.18    | 25.19    | -0.01                                | 0.18  | 0.89                               | 1.37  |
| PPUTLS46_007101 | 24.7                                     | 24.5    | 23.78   | 23.98   | 23.79    | 24.06    | -0.29                                | -0.07 | 1.74                               | 1.32  |
| PPUTLS46_014539 | 24.64                                    | 23.8    | 23.7    | 23.71   | 24.25    | 23.5     | -0.23                                | -0.36 | 1.68                               | 0.23  |
| PPUTLS46_024068 | 24.63                                    | 23.7    | 22.95   | 22.65   | 23.94    | 23.85    | -1.02                                | -0.07 | 4.12                               | 0.73  |
| PPUTLS46_024053 | 24.48                                    | 23.98   | 24      | 23.85   | 23.63    | 23.35    | -0.16                                | -0.29 | 2.17                               | 3.49  |
| PPUTLS46_007356 | 24.41                                    | 23.85   | 23.51   | 23.08   | 23.96    | 23.69    | -0.68                                | -0.07 | 6.15                               | 0.33  |
| PPUTLS46_019251 | 24.37                                    | 23.72   | 22.94   | 22.69   | 21.84    | 21.75    | -1.03                                | -1.64 | 7.03                               | 10.06 |
| PPUTLS46_024048 | 24.28                                    | 23.87   | 23.71   | 23.82   | 23.9     | 23.14    | -0.01                                | 0.02  | 1.13                               | 0.99  |
| PPUTLS46_024018 | 24.21                                    | 24      | 22.74   | 22.4    | 23.72    | 23.96    | -1.39                                | -0.16 | 14.45                              | 0.31  |
| PPUTLS46_021586 | 24.15                                    | 24.1    | 24.35   | 24.51   | 23.54    | 23.49    | 0.2                                  | -0.11 | 0.62                               | 1.63  |
| PPUTLS46_019601 | 24.1                                     | 22.61   | 23.42   | 22.57   | 23.44    | 22.62    | -0.29                                | -0.63 | 0.6                                | 0.23  |
| PPUTLS46_005216 | 24.09                                    | 23.85   | 21.91   | 21.98   | 22.29    | 22.11    | -1.65                                | -1.3  | 6.15                               | 15.49 |
| PPUTLS46_014194 | 24.07                                    | 23.45   | 22.54   | 22.19   | 23.59    | 23.49    | -1.21                                | 0.07  | 9.58                               | 0.76  |
| PPUTLS46_009559 | 24.06                                    | 21.65   | 25.11   | 24.23   | 22.23    | 20.51    | 0.58                                 | -0.51 | 1.42                               | 0.68  |
| PPUTLS46_021686 | 23.96                                    | 23.77   | 23.82   | 23.59   | 24.93    | 24.33    | -0.02                                | 0.69  | 1.35                               | 3     |
| PPUTLS46_023938 | 23.91                                    | 23.29   | 22.32   | 22.99   | 23.96    | 22.57    | -0.29                                | -0.33 | 1.4                                | 0.58  |
| PPUTLS46_009539 | 23.88                                    | 24.07   | 23.17   | 22.94   | 23.7     | 23.74    | -0.56                                | -0.16 | 2.66                               | 0.51  |
| PPUTLS46_000260 | 23.86                                    | 23.53   | 20.66   | 17.63   | 23.28    | 23.51    | -2.47                                | -0.08 | 2.17                               | 0.55  |
| PPUTLS46_019616 | 23.85                                    | 24.01   | 23.05   | 23.29   | 23.81    | 23.15    | -0.19                                | -0.03 | 1.38                               | 1.12  |
| PPUTLS46_021896 | 23.8                                     | 23.34   | 24.92   | 24.48   | 21.98    | 21.91    | 1                                    | -1.17 | 11.03                              | 16.61 |
| PPUTLS46_010554 | 23.79                                    | 23.85   | 22.49   | 18.97   | 23.97    | 24.16    | -0.93                                | 0.14  | 1.38                               | 1.32  |
| PPUTLS46_022201 | 23.78                                    | 22.27   | 23.74   | 23.17   | 22.19    | 21.45    | 0.19                                 | -0.03 | 0.79                               | 1.08  |
| PPUTLS46_023898 | 23.77                                    | 23.28   | 22.97   | 22.28   | 23.54    | 23.63    | -0.59                                | 0.19  | 3.16                               | 1.92  |
| PPUTLS46_024058 | 23.76                                    | 23.3    | 23.26   | 23.4    | 23.5     | 23.24    | 0                                    | 0.03  | 0.91                               | 0.97  |
| PPUTLS46_016889 | 23.75                                    | 22.86   | 21.93   | 21.43   | 22.46    | 22.6     | -1.26                                | -0.18 | 4.84                               | 1.53  |
| PPUTLS46_006281 | 23.73                                    | 24      | 24.47   | 23.44   | 23.02    | 23.73    | 0.03                                 | -0.45 | 0.99                               | 0.33  |
| PPUTLS46_024038 | 23.69                                    | 23.13   | 23.2    | 22.77   | 23.47    | 23.1     | -0.27                                | 0.1   | 3.24                               | 0.63  |
| PPUTLS46_023923 | 23.68                                    | 23.93   | 22.01   | 22.76   | 23.26    | 23.5     | -0.47                                | -0.24 | 1.53                               | 0.44  |
| PPUTLS46_019431 | 23.67                                    | 22.86   | 23      | 22.8    | 21.9     | 21.17    | -0.16                                | -0.86 | 1.65                               | 2.83  |
| PPUTLS46_019611 | 23.66                                    | 23.41   | 23.71   | 23.5    | 23.51    | 23.09    | 0.1                                  | 0.03  | 0.35                               | 1     |
| PPUTLS46_024598 | 23.66                                    | 23.56   | 24.39   | 23.94   | 21.78    | 22.14    | 0.39                                 | -0.89 | 2.84                               | 3.42  |
| PPUTLS46_022536 | 23.65                                    | 22.73   | 20.54   | 19.49   | 16.01    | 16.87    | -2.43                                | -5.29 | 4.73                               | 8.03  |
| PPUTLS46_013643 | 23.61                                    | 23.4    | 22.06   | 22.21   | 23.42    | 22.89    | -0.95                                | 0.03  | 3.47                               | 1.01  |
| PPUTLS46_023533 | 23.56                                    | 23.21   | 23.07   | 22.67   | 23.44    | 22.59    | -0.45                                | -0.06 | 9.52                               | 0.81  |
| PPUTLS46_023943 | 23.51                                    | 23.17   | 22.12   | 22.21   | 24.07    | 23.16    | -0.82                                | 0.14  | 3.53                               | 1.21  |
| PPUTLS46_023488 | 23.46                                    | 22.47   | 20.4    | 20.06   |          |          | -2.3                                 |       | 7.36                               | 12.51 |
| PPUTLS46_023893 | 23.44                                    | 22.82   | 22.86   | 22.1    | 21.69    | 22.4     | -0.27                                | -0.29 | 1.81                               | 1.54  |
| PPUTLS46_006246 | 23.37                                    | 23.04   | 22.39   | 21.58   | 22.82    | 22.78    | -0.83                                | -0.04 | 3.25                               | 1.94  |
| PPUTLS46_009734 | 23.34                                    | 22.92   | 23.39   | 22.82   | 24.42    | 24.26    | -0.04                                | 1.36  | 0.63                               | 37.65 |
| PPUTLS46_022531 | 23.34                                    | 22.73   | 21.69   | 21.02   | 17.97    | 17.75    | -1.32                                | -4.39 | 5.48                               | 27.93 |
| PPUTLS46_018079 | 23.32                                    | 23.13   | 24.16   | 23.49   | 22.78    | 22.75    | 0.36                                 | -0.03 | 2.13                               | 1.43  |
| PPUTLS46_001662 | 23.25                                    | 22.86   | 22.49   | 22.34   | 22.54    | 22.22    | -0.49                                | -0.26 | 4.57                               | 3.31  |
| PPUTLS46_019691 | 23.23                                    | 23.34   | 22.42   | 22.43   | 24.7     | 25.11    | -0.44                                | 1.29  | 2.17                               | 3.62  |
| PPUTLS46_023933 | 23.17                                    | 23.16   | 22.88   | 21.86   | 23.47    | 22.27    | -0.33                                | -0.03 | 1.63                               | 0.91  |
| PPUTLS46_023758 | 23.16                                    | 23.85   | 22.95   | 22.83   | 23.14    | 23.44    | -0.05                                | 0.49  | 1.12                               | 0.4   |
| PPUTLS46_014534 | 23.16                                    | 22.77   | 22.37   | 22.43   | 22.02    | 22.19    | -0.27                                | -0.34 | 1.98                               | 2.74  |
| PPUTLS46_009649 | 23.15                                    | 23.22   | 23.17   | 23.1    | 23.2     | 23.57    | -0.19                                | 0.05  | 0.37                               | 0.96  |
| PPUTLS46_013658 | 23.15                                    | 23.21   | 23.2    | 23.09   | 20.04    | 20.5     | -0.16                                | -1.95 | 0.41                               | 5.07  |
| PPUTLS46_024063 | 23.08                                    | 21.66   | 22.09   | 22.47   | 22.03    | 20.17    | 0.03                                 | -0.3  | 1                                  | 0.75  |
| PPUTLS46_024603 | 23.08                                    | 22.79   | 23.66   | 23.2    | 21.41    | 20.75    | 0.39                                 | -1.15 | 3.97                               | 4.39  |
| PPUTLS46_019621 | 23.04                                    | 22.17   | 23.23   | 23.08   | 22.75    | 22.67    | 0.29                                 | 0.12  | 1.79                               | 1.27  |
| PPUTLS46_007181 | 23.04                                    | 22.13   | 22.56   | 21.99   | 21.58    | 21.72    | 0.01                                 | -0.29 | 0.95                               | 1.81  |
| PPUTLS46_024308 | 23.01                                    | 22.2    | 22.93   | 22.51   | 23.17    | 22.84    | 0.12                                 | 0.33  | 0.64                               | 1.95  |
| PPUTLS46_024073 | 23.01                                    | 22.87   | 21.88   | 21.34   | 22.5     | 22.55    | -1.09                                | -0.02 | 6.15                               | 0.77  |
| PPUTLS46_023483 | 23.01                                    | 22.99   | 19.36   | 19.98   |          |          | -2.48                                |       | 4.22                               | 22.25 |
| PPUTLS46_019631 | 22.99                                    | 22.06   | 22.86   | 22.59   | 22.7     | 22.82    | 0.04                                 | 0.22  | 0.96                               | 1.46  |
| PPUTLS46_025193 | 22.98                                    | 23.62   | 21.8    | 22.6    | 22.36    | 22.98    | 0.02                                 | -0.43 | 1.01                               | 0.45  |

|                 |                                                  |       |       |       |       |       |       |       |       |       |        |
|-----------------|--------------------------------------------------|-------|-------|-------|-------|-------|-------|-------|-------|-------|--------|
| PPUTLS46_004464 | glyceraldehyde-3-phosphate dehydrogenase         | 22.97 | 22.09 | 22.19 | 21.63 | 22.88 | 22.96 | -0.26 | 0.35  | 1.82  | 1.86   |
| PPUTLS46_023958 | 50S ribosomal protein L5                         | 22.97 | 23.02 | 22.45 | 22    | 22.29 | 22.61 | -0.51 | -0.12 | 2.95  | 0.64   |
| PPUTLS46_022221 | amino acid ABC transporter substrate-binding     | 22.94 | 23.28 | 24.15 | 23.57 | 22.32 | 22.37 | 0.41  | -0.03 | 1.78  | 1.13   |
| PPUTLS46_011965 | isocitrate dehydrogenase                         | 22.89 | 22.35 | 16.54 | 17.68 | 21.57 | 21.29 | -4.27 | -0.69 | 4.69  | 5.86   |
| PPUTLS46_005411 | glutamine synthetase                             | 22.88 | 22.53 | 24.81 | 24.38 | 22.97 | 23.16 | 1.76  | 0.4   | 22.26 | 2.64   |
| PPUTLS46_017904 | thioredoxin                                      | 22.88 | 22.73 | 22.37 | 22.05 | 22.79 | 22.62 | -0.45 | 0.09  | 4.46  | 1.39   |
| PPUTLS46_016659 | FOF1 ATP synthase subunit B                      | 22.88 | 22.55 | 23    | 22.91 | 21.45 | 22.5  | 0.05  | -0.09 | 1.13  | 0.85   |
| PPUTLS46_024903 | extracellular solute-binding protein             | 22.87 | 22.27 | 23.13 | 22.99 | 22.83 | 22.42 | 0.3   | 0.09  | 2.38  | 1.23   |
| PPUTLS46_006231 | 30S ribosomal protein S6                         | 22.86 | 22.59 | 22.57 | 21.86 | 22.35 | 22.04 | -0.24 | -0.14 | 1.87  | 2.24   |
| PPUTLS46_023993 | 50S ribosomal protein L22                        | 22.85 | 19.06 | 22.28 | 21.9  | 21.81 | 18.89 | 0.18  | -2.45 | 0.93  | 0.15   |
| PPUTLS46_023908 | 30S ribosomal protein S13                        | 22.84 | 20.41 | 22.08 | 20.26 | 22.25 | 20.66 | -1.15 | 1.41  | 0.31  | 0.17   |
| PPUTLS46_001452 | 50S ribosomal protein L21                        | 22.8  | 22.92 | 20.28 | 20.6  | 22.52 | 22.24 | -1.75 | -0.02 | 4.01  | 1.14   |
| PPUTLS46_009009 | putative glucose dehydrogenase subunit alpha     | 22.79 | 22.38 | 22.51 | 22.43 |       |       | 0.02  |       | 0.95  | 174.44 |
| PPUTLS46_023968 | 50S ribosomal protein L14                        | 22.78 | 22.69 | 21.99 | 21.51 | 22.84 | 22.23 | -0.77 | 0.04  | 4.75  | 1.03   |
| PPUTLS46_024013 | 50S ribosomal protein L4                         | 22.78 | 22.46 | 21.65 | 22.52 | 22.37 | 22    | -0.14 | -0.04 | 0.82  | 1.44   |
| PPUTLS46_021556 | Ferritin Dps family protein                      | 22.77 | 23.26 | 22.27 | 22.6  | 22.51 | 23.27 | -0.1  | 0.72  | 0.81  | 0.15   |
| PPUTLS46_023903 | 30S ribosomal protein S11                        | 22.75 | 22.88 | 21.36 | 21.86 | 22.87 | 22.75 | -0.46 | 0.04  | 1.67  | 1.02   |
| PPUTLS46_001262 | 50S ribosomal protein L25/general stress protein | 22.74 | 22.62 | 22.54 | 22.19 | 21.88 | 22.45 | -0.18 | -0.16 | 2.34  | 0.62   |
| PPUTLS46_005011 | dihydroxy-acid dehydratase                       | 22.73 | 22.21 | 21.19 | 21.73 | 21.58 | 21.73 | -0.51 | -0.43 | 1.76  | 2.79   |
| PPUTLS46_013423 | 50S ribosomal protein L13                        | 22.72 | 20.41 | 22.31 | 21.46 | 21.49 | 18.55 | 0.55  | -0.94 | 0.58  | 0.57   |
| PPUTLS46_025018 | outer membrane porin                             | 22.71 | 22.76 | 22.72 | 22.84 | 22.49 | 22.16 | 0.46  | 0     | 0.03  | 1.1    |
| PPUTLS46_013678 | transcriptional regulator MvaT, P16 subunit      | 22.69 | 21.81 | 22.68 | 22.94 | 21.72 | 20.6  | 0.2   | -0.05 | 1.29  | 1.11   |
| PPUTLS46_005826 | phosphoglycerate kinase                          | 22.66 | 22.3  | 21.83 | 21.61 | 21.85 | 21.21 | -0.66 | -0.34 | 8.97  | 2.08   |
| PPUTLS46_003872 | multifunctional nucleoside diphosphate           | 22.6  | 23.09 | 23.05 | 22.14 | 22.7  | 22.89 | -0.03 | 0.31  | 1.09  | 0.53   |
| PPUTLS46_020876 | TolC family type I secretion outer membrane      | 22.58 | 22.47 | 23.21 | 22.98 | 22.91 | 23.37 | 0.39  | 0.42  | 2.97  | 1.9    |
| PPUTLS46_007201 | polynucleotide phosphorylase/polyadenylase       | 22.56 | 21.51 | 22.4  | 22.05 | 21.62 | 21.19 | 0.1   | -0.08 | 0.83  | 0.78   |
| PPUTLS46_023963 | 50S ribosomal protein L24                        | 22.55 | 22.38 | 22.26 | 21.39 | 21.81 | 22.38 | -0.27 | -0.22 | 1.68  | 0.49   |
| PPUTLS46_007121 | carbamoyl phosphate synthase large subunit       | 22.54 | 21.86 | 21.9  | 21.57 | 22.15 | 21.82 | -0.29 | 0.22  | 2.74  | 0.21   |
| PPUTLS46_004129 | phosphoenolpyruvate synthase                     | 22.53 | 21.34 | 21.02 | 20.51 | 21.84 | 21.62 | -0.67 | 0.24  | 2.36  | 0.61   |
| PPUTLS46_000255 | 3-ketoacyl-(acyl-carrier-protein) reductase      | 22.5  | 21.57 | 21.97 | 21.23 | 20.73 | 21.2  | 0.03  | -0.35 | 0.99  | 1.69   |
| PPUTLS46_016404 | tryptophan synthase subunit alpha                | 22.49 | 21.95 | 20.53 | 20.4  | 20.36 | 21.08 | -1.53 | -0.62 | 9.41  | 2.11   |
| PPUTLS46_023948 | 30S ribosomal protein S8                         | 22.48 | 21.59 | 22.22 | 21.37 | 22.19 | 21.6  | -0.22 | 0.37  | 0.51  | 0.25   |
| PPUTLS46_023468 | acetyl-CoA carboxylase biotin carboxylase        | 22.47 | 22.2  | 22.7  | 22.3  | 21.59 | 22.02 | 0.11  | -0.03 | 2     | 0.83   |
| PPUTLS46_006196 | adenylosuccinate synthetase                      | 22.47 | 21.68 | 21.86 | 21.89 | 20.4  | 20.69 | -0.02 | -0.81 | 1.13  | 3.1    |
| PPUTLS46_012735 | heat shock protein 90                            | 22.46 | 21.53 | 20.66 | 20.45 | 20.93 | 20.69 | -1.08 | -0.49 | 4.22  | 2.38   |
| PPUTLS46_021721 | ribonucleotide-diphosphate reductase subunit     | 22.44 | 22.16 | 16.59 | 17.57 | 21.44 | 21.64 | -4.08 | -0.21 | 4.96  | 2.02   |
| PPUTLS46_020706 | acetyl-CoA synthetase                            | 22.44 | 22.31 | 17.51 | 16.57 | 19.77 | 19.18 | -4.7  | -2.12 | 10.41 | 7.32   |
| PPUTLS46_002452 | branched-chain amino acid aminotransferase       | 22.42 | 22.02 | 21.97 | 22.07 | 20.31 | 20.95 | -0.01 | -0.73 | 0.89  | 2.48   |
| PPUTLS46_014179 | 30S ribosomal protein S16                        | 22.41 | 21.68 | 21.63 | 20.63 | 22.25 | 21.04 | -0.32 | -0.35 | 1.62  | 0.5    |
| PPUTLS46_014389 | adenylate kinase                                 | 22.4  | 21.61 | 21.93 | 21.72 | 22.83 | 21.7  | -0.03 | 0.19  | 1.22  | 0.77   |
| PPUTLS46_022591 | carbamate kinase                                 | 22.38 | 21.52 | 22.01 | 21.68 | 22.16 | 21.84 | 0     | 0.06  | 0.89  | 0.92   |
| PPUTLS46_023998 | 30S ribosomal protein S19                        | 22.38 | 22.44 | 18.62 | 16.46 | 21.78 | 21.58 | -3.36 | -0.2  | 3.32  | 1.8    |
| PPUTLS46_022076 | CapB                                             | 22.38 | 21.52 | 18.45 | 17.48 | 19.53 | 17.17 | -3.29 | -1.69 | 6.71  | 2.14   |
| PPUTLS46_020636 | aspartate kinase                                 | 22.35 | 21.74 | 21.09 | 20.71 | 21.73 | 21.12 | -0.97 | 0.01  | 7.99  | 1.04   |
| PPUTLS46_005261 | glutamate synthase subunit alpha                 | 22.34 | 21.06 | 20.94 | 20.38 | 21.59 | 21.54 | -0.49 | 0.17  | 1.9   | 0.78   |
| PPUTLS46_022466 | Pgl                                              | 22.34 | 21.05 | 22.48 | 22.37 | 15.18 | 15.19 | 0.31  | -5.19 | 1.49  | 9.59   |
| PPUTLS46_023883 | catalase                                         | 22.33 | 22.44 | 21.23 | 20.21 | 22.27 | 22.01 | -1.08 | 0.06  | 2.8   | 0.92   |
| PPUTLS46_005761 | S-adenosyl-L-homocysteine hydrolase              | 22.33 | 21.69 | 22.59 | 22.35 | 21.15 | 21.42 | 0.3   | -0.17 | 2.58  | 1.6    |
| PPUTLS46_001542 | serine hydroxymethyltransferase                  | 22.32 | 21.45 | 21.33 | 20.85 | 22.25 | 21.7  | -0.47 | 0.14  | 2.57  | 0.75   |
| PPUTLS46_022661 | cold-shock domain-containing protein             | 22.3  | 22.8  | 22.51 | 20.81 | 22.7  | 23.18 | -0.18 | 0.11  | 1.17  | 0.88   |
| PPUTLS46_019646 | type II citrate synthase                         | 22.3  | 21.46 | 21.98 | 21.26 | 21.38 | 22.42 | -0.09 | 0.08  | 0.69  | 0.94   |
| PPUTLS46_005816 | transketolase                                    | 22.29 | 21.75 | 22.36 | 21.97 | 21.64 | 21.26 | 0.04  | -0.07 | 1.07  | 1.51   |
| PPUTLS46_016884 | pyruvate carboxylase subunit A                   | 22.28 | 22.21 | 21.01 | 20.1  | 22.12 | 21.44 | -1.19 | -0.02 | 3.46  | 1.13   |
| PPUTLS46_013433 | ubiquinol-cytochrome c reductase, iron-sulfur    | 22.28 | 21.67 | 22.2  | 21.81 | 21.7  | 21.4  | -0.04 | 0     | 0.51  | 0.82   |
| PPUTLS46_015949 | translation elongation factor P (EF-P)           | 22.27 | 22.49 | 21.96 | 21.39 | 22.28 | 22.43 | -0.38 | 0.2   | 1.98  | 0.6    |
| PPUTLS46_005841 | fructose-1,6-bisphosphate aldolase               | 22.27 | 21.54 | 22.53 | 21.93 | 21.67 | 21.22 | 0.04  | -0.1  | 0.96  | 0.6    |
| PPUTLS46_001067 | Protein of unknown function (DUF1329)            | 22.26 | 21.82 | 23.22 | 22.78 | 22.05 | 22.03 | 0.84  | 0.19  | 9.66  | 2.65   |
| PPUTLS46_017104 | endoribonuclease                                 | 22.25 | 22.53 | 22.91 | 22.43 | 22.81 | 22.59 | 0.09  | 0.23  | 1.16  | 1.46   |
| PPUTLS46_014549 | ribosome recycling factor                        | 22.19 | 22.51 | 21.27 | 21.35 | 22.24 | 21.96 | -0.48 | -0.03 | 1.96  | 0.88   |
| PPUTLS46_007176 | transcription elongation factor NusA             | 22.19 | 21.85 | 22.59 | 22.17 | 21    | 21.23 | 0.28  | -0.35 | 4.26  | 2.49   |
| PPUTLS46_025098 | phosphoenolpyruvate carboxykinase                | 22.18 | 22.45 | 22.06 | 21.7  | 23.07 | 23.36 | -0.15 | 0.59  | 1.44  | 2.12   |
| PPUTLS46_019276 | cytochrome c-type protein                        | 22.18 | 22.12 | 20.83 | 20.62 |       |       | -1.17 |       | 6.53  | 21.26  |
| PPUTLS46_020701 | cationic amino acid ABC transporter, periplasmic | 22.17 | 21.82 | 22.91 | 22.66 | 20.04 | 20.38 | 0.7   | -1.08 | 10.75 | 4.43   |
| PPUTLS46_024023 | 30S ribosomal protein S10                        | 22.15 | 23.23 | 21.72 | 21.99 | 22.61 | 23.04 | -0.03 | 0.5   | 0.94  | 0.54   |
| PPUTLS46_023988 | 30S ribosomal protein S3                         | 22.15 | 20.72 | 22.27 | 21.94 | 21.9  | 21.08 | 0.18  | 0.52  | 1.24  | 0.4    |
| PPUTLS46_001857 | 30S ribosomal protein S20                        | 22.15 | 16.56 | 20.82 | 20.58 | 19.84 | 15.48 | 0.35  | -3    | 0.9   | 0.32   |
| PPUTLS46_019286 | pentapeptide repeat-containing protein           | 22.15 | 21.89 | 19.66 | 18.94 |       |       | -2.33 |       | 8.45  | 56.35  |
| PPUTLS46_015954 | OsmC family protein                              | 22.14 | 21.91 | 21.91 | 21.1  | 22.98 | 23.21 | -0.2  | 1     | 1.59  | 4.64   |
| PPUTLS46_019626 | succinate dehydrogenase iron-sulfur subunit      | 22.13 | 21.26 | 21.61 | 21.39 | 22.8  | 22.36 | -0.02 | 0.71  | 1.16  | 2.76   |
| PPUTLS46_014639 | enolase                                          | 22.11 | 22.17 | 21.95 | 21.3  | 20.33 | 20.34 | -0.24 | -1.12 | 1.73  | 4.84   |
| PPUTLS46_000385 | isopropylmalate isomerase large subunit          | 22.1  | 21.31 | 20.18 | 19.61 | 21.24 | 21.38 | -1.45 | 0.03  | 5.71  | 1      |
| PPUTLS46_013948 | outer membrane porin                             | 22.09 | 21.14 | 20.28 | 20.65 | 19.2  | 18.22 | -0.62 | -1.76 | 2.01  | 3.66   |
| PPUTLS46_003452 | PpiC-type peptidyl-prolyl cis-trans isomerase    | 22.08 | 21.42 | 20.52 | 19.93 | 22.07 | 22.31 | -1.21 | 0.43  | 5.69  | 2.26   |
| PPUTLS46_006296 | extracellular ligand-binding receptor            | 22.07 | 21.63 | 23.38 | 23.8  | 20.51 | 20.93 | 1.14  | -0.46 | 2.87  | 2.29   |
| PPUTLS46_013943 | tricarboxylate transport protein TctC            | 22.06 | 20.18 | 19.77 | 19.18 | 18.79 | 17.99 | -0.78 | -1.21 | 1.87  | 2.15   |
| PPUTLS46_016314 | carbonate dehydratase                            | 22.05 | 21.2  | 21.1  | 19.87 | 21.21 | 21.55 | -0.36 | 0.05  | 1.52  | 0.96   |
| PPUTLS46_000210 | ribonuclease E                                   | 22.05 | 22.35 | 21.81 | 21.38 | 20.23 | 21.21 | -0.27 | -0.26 | 1.72  | 1.33   |
| PPUTLS46_002042 | redoxin domain-containing protein                | 22.04 | 18.94 | 21.95 | 20.88 | 22.04 | 20    | 0.51  | 1.4   | 0.73  | 0.38   |
| PPUTLS46_023953 | 30S ribosomal protein S14                        | 22.03 | 21.01 | 21.03 | 20.72 | 21.6  | 19.91 | -0.31 | -0.43 | 1.89  | 0.59   |
| PPUTLS46_010254 | alkyl hydroperoxide reductase, C subunit         | 22.01 | 21.27 | 20.62 | 20.27 | 22.4  | 22.03 | -0.96 | 0.51  | 5.55  | 2.68   |
| PPUTLS46_022426 | inosine 5'-monophosphate dehydrogenase           | 22.01 | 21.8  | 22.16 | 22.12 | 21.63 | 21.78 | 0.08  | 0.18  | 0.8   | 0.31   |
| PPUTLS46_024348 | 30S ribosomal protein S21                        | 21.98 | 22.01 | 21.61 | 20.88 | 21.89 | 22.18 | -0.42 | 0.15  | 2.12  | 0.7    |
| PPUTLS46_022211 | glycerol-3-phosphate dehydrogenase               | 21.98 | 20.86 | 21.18 | 20.4  | 17.22 | 18.37 | -0.05 | -2.24 | 1.15  | 3.28   |
| PPUTLS46_005601 | protein PhaF                                     | 21.97 | 21.11 | 24.62 | 24.2  | 24.91 | 24.04 | 2.49  | 2.42  | 9.27  | 5.1    |
| PPUTLS46_005736 | Uncharacterized conserved protein                | 21.96 | 22.01 | 21.96 | 21.31 | 20.86 | 21.6  | -0.12 | -0.12 | 1.42  | 0.78   |

|                 |                                                  |       |       |       |       |       |       |       |       |       |        |
|-----------------|--------------------------------------------------|-------|-------|-------|-------|-------|-------|-------|-------|-------|--------|
| PPUTLS46_023121 | fumarate hydratase                               | 21.95 | 22.08 | 21.84 | 21.06 | 21.84 | 22.01 | -0.24 | 0.24  | 1.58  | 0.46   |
| PPUTLS46_025298 | succinate-semialdehyde dehydrogenase I           | 21.93 | 20.77 | 20.63 | 20.53 | 21.13 | 21.84 | -0.39 | 0.1   | 1.81  | 1.09   |
| PPUTLS46_004664 | UspA domain-containing protein                   | 21.93 | 21.22 | 21.52 | 21.04 | 20.65 | 22.24 | -0.06 | 0.24  | 1.39  | 0.82   |
| PPUTLS46_022456 | 2-isopropylmalate synthase                       | 21.92 | 21.1  | 20.35 | 19.63 | 21.03 | 21.15 | -1.07 | 0.03  | 3.69  | 1      |
| PPUTLS46_021711 | ribonucleotide-diphosphate reductase subunit     | 21.9  | 21.98 | 19.61 | 19.5  | 22.03 | 21.6  | -1.99 | 0.05  | 7.06  | 1.06   |
| PPUTLS46_007346 | acetolactate synthase 3 catalytic subunit        | 21.86 | 20.82 | 20.07 | 19.36 | 20.97 | 21.72 | -1.08 | 0.04  | 3.23  | 1.02   |
| PPUTLS46_023463 | acetyl-CoA carboxylase biotin carboxyl carrier   | 21.85 | 21.68 | 20.87 | 20.57 | 20.04 | 20    | -0.9  | -1.22 | 8.24  | 9.61   |
| PPUTLS46_017434 | 50S ribosomal protein L33                        | 21.81 | 21.56 | 20.94 | 20.39 | 21.6  | 20.97 | -0.8  | 0.03  | 5.32  | 1      |
| PPUTLS46_011130 | UTP-glucose-1-phosphate uridylyltransferase      | 21.81 | 19.9  | 20.73 | 20.62 | 21.6  | 19.64 | -0.06 | 1.46  | 0.91  | 0.09   |
| PPUTLS46_022706 | histone family protein DNA-binding protein       | 21.8  | 20.55 | 22.59 | 22.12 | 21.83 | 19.79 | 0.65  | -0.85 | 2.14  | 0.37   |
| PPUTLS46_016399 | tryptophan synthase subunit beta                 | 21.8  | 19.54 | 21.16 | 20.16 | 19.42 | 18.13 | -0.66 | -0.08 | 0.46  | 1.07   |
| PPUTLS46_020641 | alanyl-tRNA ligase                               | 21.78 | 21.75 | 21.13 | 21.64 | 21.07 | 21.06 | -0.2  | -0.16 | 0.67  | 1.8    |
| PPUTLS46_016304 | hypothetical protein                             | 21.78 | 20.44 | 21.14 | 20.66 | 19.8  | 19.4  | -0.11 | -0.52 | 0.75  | 1.84   |
| PPUTLS46_022461 | keto-hydroxyglutarate-aldolase/keto-deoxy-       | 21.78 | 18.96 | 21.41 | 20.3  |       |       | 0.74  |       | 0.56  | 1.79   |
| PPUTLS46_022396 | phosphoribosylformylglycinamide synthase         | 21.77 | 20.35 | 20.83 | 20.23 | 21.31 | 20.73 | 0.02  | 0.44  | 0.99  | 0.45   |
| PPUTLS46_014719 | recombinase A                                    | 21.77 | 22.27 | 20.51 | 20.45 | 19.89 | 20.41 | -0.95 | -0.76 | 2.71  | 2.11   |
| PPUTLS46_013553 | cell division protein FtsZ                       | 21.76 | 21.18 | 17.74 | 18.27 | 21.61 | 21.08 | -2.72 | 0.17  | 4.96  | 0.54   |
| PPUTLS46_001257 | ribose-phosphate pyrophosphokinase               | 21.76 | 21.32 | 21.69 | 21.36 | 20.37 | 20.7  | 0.02  | -0.39 | 1.18  | 2.3    |
| PPUTLS46_019686 | electron transfer flavoprotein subunit alpha     | 21.73 | 20.81 | 21.38 | 21.02 | 22.67 | 22.93 | -0.04 | 1.31  | 0.78  | 3.85   |
| PPUTLS46_023983 | 50S ribosomal protein L16                        | 21.72 | 19.84 | 21.31 | 20.56 | 20.53 | 17.47 | 0.48  | -0.56 | 0.54  | 0.73   |
| PPUTLS46_016544 | glucose-methanol-choline oxidoreductase          | 21.71 | 20.55 | 19.68 | 18.98 |       |       | -1.21 |       | 3.22  | 6.48   |
| PPUTLS46_004866 | Domain of unknown function (DUF4399)             | 21.7  | 20.83 | 21.53 | 21.2  | 21.15 | 20.85 | 0.09  | -0.18 | 0.81  | 0.41   |
| PPUTLS46_023493 | acetoin dehydrogenase E2 subunit                 | 21.7  | 21.38 | 19.41 | 18.63 |       |       | -2.09 |       | 6.97  | 110.64 |
| PPUTLS46_013443 | ubiquinol--cytochrome c reductase, cytochrome c1 | 21.62 | 21.32 | 21.78 | 21.56 | 20.49 | 21.11 | 0.09  | 0.01  | 1.67  | 0.96   |
| PPUTLS46_022696 | valyl-tRNA ligase                                | 21.62 | 20.49 | 21.58 | 21.03 | 19.46 | 20.17 | 0.2   | -0.38 | 0.67  | 1.53   |
| PPUTLS46_018356 | aldehyde dehydrogenase                           | 21.61 | 20.71 | 20.96 | 20.8  | 18.79 | 17.13 | -0.07 | -1.69 | 1.31  | 2.62   |
| PPUTLS46_000405 | aspartate-semialdehyde dehydrogenase             | 21.6  | 20.76 | 20.11 | 19.7  | 21.05 | 20.77 | -0.97 | -0.15 | 4.44  | 0.43   |
| PPUTLS46_000240 | 50S ribosomal protein L32                        | 21.6  | 20.05 | 19.49 | 17.61 | 20.51 | 20.78 | -0.8  | 0.13  | 1.58  | 0.88   |
| PPUTLS46_008999 | glyoxalase/bleomycin resistance                  | 21.6  | 21.14 | 21.12 | 21.32 |       |       | -0.06 |       | 0.78  | 58.93  |
| PPUTLS46_012405 | elongation factor G                              | 21.59 | 21.64 | 22.26 | 21.67 | 22.13 | 21.73 | 0.17  | 0.33  | 1.41  | 1.9    |
| PPUTLS46_022131 | argininosuccinate synthase                       | 21.59 | 21.03 | 21.15 | 20.55 | 21.22 | 21.49 | -0.21 | 0.12  | 1.98  | 1.28   |
| PPUTLS46_007096 | heat shock protein GrpE                          | 21.57 | 21.18 | 20.88 | 20.59 | 21.37 | 20.78 | -0.58 | -0.05 | 19.38 | 0.73   |
| PPUTLS46_012465 | NADH dehydrogenase subunit G                     | 21.56 | 20.24 | 21.93 | 21.41 | 20.68 | 20.82 | 0.24  | 0.12  | 1.34  | 0.87   |
| PPUTLS46_014494 | 2,3,4,5-tetrahydroxyridine-2,6-carboxylate       | 21.55 | 20.89 | 20.88 | 20.62 | 20.92 | 20.78 | -0.3  | 0     | 2.87  | 0.84   |
| PPUTLS46_022166 | bacterioferritin                                 | 21.53 | 20.16 | 23.1  | 22.67 | 22.47 | 21.63 | 1.41  | 0.6   | 3.26  | 1.71   |
| PPUTLS46_021486 | peptidoglycan-associated lipoprotein             | 21.52 | 23.03 | 21.9  | 22.26 | 22.51 | 22.98 | -0.6  | 0.43  | 0.5   | 0.7    |
| PPUTLS46_002837 | cyclophilin type peptidyl-prolyl cis-trans       | 21.52 | 21.51 | 21.3  | 20.37 | 20.76 | 20.24 | -0.28 | -0.43 | 1.6   | 2.3    |
| PPUTLS46_007934 | glycerate kinase                                 | 21.5  | 20.79 | 20.39 | 20.32 |       |       | -0.52 |       | 2.93  | 15.11  |
| PPUTLS46_007434 | enoyl-CoA hydratase/isomerase                    | 21.48 | 20.35 | 21.18 | 21.03 | 20.36 | 19.93 | 0.04  | 0.01  | 0.97  | 0.96   |
| PPUTLS46_014629 | CTP synthetase                                   | 21.47 | 20.78 | 21.98 | 21.77 | 20.94 | 21    | 0.54  | 0.03  | 3.42  | 0.98   |
| PPUTLS46_021361 | Protein of unknown function (DUF4223)            | 21.47 | 17.34 | 19.51 | 18.2  | 20.64 | 21.11 | -0.92 | 0.14  | 0.61  | 1.04   |
| PPUTLS46_005421 | GTP-binding protein TypA                         | 21.46 | 20.89 | 20.39 | 20.32 | 21.12 | 21.05 | -0.59 | 0.08  | 3.65  | 1.4    |
| PPUTLS46_017504 | cytochrome c5                                    | 21.45 | 21.84 | 21.39 | 21.04 | 22.17 | 22.42 | -0.09 | 0.33  | 1.28  | 1.53   |
| PPUTLS46_006181 | HflK protein                                     | 21.45 | 21.53 | 21.82 | 21.58 | 21.26 | 20.83 | 0.06  | -0.02 | 0.89  | 1.15   |
| PPUTLS46_004871 | D-3-phosphoglycerate dehydrogenase               | 21.44 | 21.25 | 21.6  | 21.27 | 21.83 | 20.68 | 0.03  | 0.13  | 1.01  | 0.86   |
| PPUTLS46_007126 | transcription elongation factor GreA             | 21.44 | 21.24 | 19.49 | 17.52 | 20.3  | 20.63 | -1.57 | -0.22 | 2.23  | 1.74   |
| PPUTLS46_021536 | aspartyl-tRNA ligase                             | 21.43 | 20.1  | 21.52 | 20.99 | 20.75 | 20.24 | 0.06  | -0.4  | 0.95  | 0.37   |
| PPUTLS46_015189 | Fe3+ ABC transporter periplasmic component-like  | 21.42 | 21.18 | 22.67 | 21.98 | 21.89 | 21.51 | 0.74  | 0.49  | 3.42  | 3.47   |
| PPUTLS46_016674 | FOF1 ATP synthase subunit gamma                  | 21.41 | 21.63 | 21.61 | 20.95 | 21.95 | 21.6  | -0.05 | 0.23  | 1.18  | 1.48   |
| PPUTLS46_001132 | lipoprotein                                      | 21.39 | 21    | 21.5  | 20.86 | 21.42 | 21.41 | -0.04 | 0.4   | 0.69  | 5.1    |
| PPUTLS46_019866 | cbb3-type cytochrome c oxidase subunit II        | 21.38 | 21.64 | 21.88 | 21.37 | 21.64 | 22.11 | 0.04  | 0.04  | 1.02  | 1.01   |
| PPUTLS46_009904 | sulfite reductase                                | 21.38 | 21.25 | 19.28 | 19.77 | 20.92 | 21.08 | -1.09 | -0.17 | 2.68  | 0.23   |
| PPUTLS46_007281 | C4-type zinc finger DksA/TraR family protein     | 21.38 | 20.95 | 21.17 | 20.11 | 20.54 | 20.76 | -0.02 | -0.03 | 1.09  | 1.23   |
| PPUTLS46_000982 | thioredoxin reductase                            | 21.37 | 20.58 | 16.25 | 18.7  | 20.78 | 21.11 | -1.54 | 0.06  | 1.71  | 1.08   |
| PPUTLS46_009549 | ATP-dependent protease ATP-binding subunit ClpX  | 21.36 | 21.64 | 20.08 | 20.29 | 21.46 | 21.29 | -0.7  | 0.11  | 2.24  | 0.82   |
| PPUTLS46_015009 | membrane protein involved in aromatic            | 21.33 | 20.91 | 21.2  | 20.57 | 24.58 | 24.36 | -0.02 | 3.32  | 1.23  | 52.8   |
| PPUTLS46_024043 | 30S ribosomal protein S12                        | 21.33 | 18.34 | 20.56 | 18.45 | 21.37 | 20.87 | -1.55 | 0.09  | 0.25  | 1.03   |
| PPUTLS46_012715 | 3-oxoacyl-(acyl carrier protein) synthase I      | 21.33 | 20.27 | 21.18 | 20.31 | 20.27 | 20.04 | -0.47 | 0.02  | 0.16  | 0.97   |
| PPUTLS46_022421 | GMP synthase                                     | 21.32 | 20.96 | 21.84 | 21.61 | 19.83 | 20.78 | 0.49  | 0.02  | 6.74  | 0.98   |
| PPUTLS46_025293 | 4-aminobutyrate aminotransferase                 | 21.28 | 21.01 | 21.08 | 20.58 | 21.23 | 20.89 | -0.19 | 0.1   | 2.52  | 1.45   |
| PPUTLS46_008599 | CopA family copper resistance protein            | 21.28 | 21.19 | 20.84 | 20.92 | 18.72 | 17.96 | 0.02  | -2.03 | 1.03  | 5.58   |
| PPUTLS46_013378 | bifunctional sulfate adenylyltransferase subunit | 21.27 | 21.59 | 20.44 | 19.91 | 20.92 | 20.7  | -0.83 | -0.03 | 2.9   | 1.14   |
| PPUTLS46_014259 | NADH:flavin oxidoreductase/NADH oxidase          | 21.25 | 21.95 | 21.63 | 21.86 | 20.93 | 21.33 | 0.53  | -0.42 | 0.37  | 0.43   |
| PPUTLS46_005196 | arginyl-tRNA ligase                              | 21.25 | 20.95 | 21.02 | 20.76 | 19.77 | 19.22 | -0.14 | -0.98 | 3.39  | 4.59   |
| PPUTLS46_023878 | bacterioferritin                                 | 21.24 | 20.89 | 22.39 | 22.21 | 20.99 | 21.13 | 1.08  | 0.1   | 9.78  | 1.34   |
| PPUTLS46_014579 | outer membrane chaperone Skp                     | 21.24 | 20.27 | 20.95 | 21.04 | 19.53 | 20.92 | 0.06  | -0.06 | 1.05  | 0.92   |
| PPUTLS46_024153 | histidine triad                                  | 21.23 | 21.57 | 19.3  | 19.51 | 20.55 | 20.5  | -1.32 | -0.16 | 3.21  | 1.41   |
| PPUTLS46_011960 | isocitrate dehydrogenase                         | 21.22 | 20.2  | 23.03 | 22.58 | 21.18 | 21.08 | 1.65  | 0.31  | 5.07  | 1.65   |
| PPUTLS46_019876 | cytochrome c oxidase, cbb3-type subunit III      | 21.22 | 21.36 | 21.45 | 21.3  | 20.88 | 22.58 | 0.19  | 0.41  | 0.54  | 0.7    |
| PPUTLS46_004524 | Domain of unknown function (DUF4404)             | 21.2  | 21.71 | 20.31 | 18.63 | 20.53 | 20.83 | -1    | -0.08 | 1.86  | 0.83   |
| PPUTLS46_010564 | threonyl-tRNA ligase                             | 21.19 | 19.7  | 21.45 | 20.56 | 20.14 | 18.83 | 0.26  | -0.39 | 0.71  | 0.61   |
| PPUTLS46_023498 | alcohol dehydrogenase                            | 21.19 | 21.33 | 19.79 | 19.76 |       |       | -1.05 |       | 3.75  | 10.32  |
| PPUTLS46_001922 | hypothetical protein                             | 21.18 | 21.38 | 23    | 23.12 | 22.23 | 22.46 | 1.23  | 0.82  | 3.4   | 2.77   |
| PPUTLS46_014764 | oxidoreductase FAD/NAD(P)-binding subunit        | 21.18 | 20.3  | 20.89 | 19.96 | 18.04 | 18.51 | -0.19 | -1.55 | 0.61  | 4.01   |
| PPUTLS46_010034 | Domain of unknown function (DUF4174)             | 21.17 | 20.05 | 21.87 | 21.43 | 20.46 | 20.25 | 0.59  | -0.17 | 2.22  | 0.6    |
| PPUTLS46_003417 | ecotin                                           | 21.16 | 20.88 | 21.64 | 21.23 | 21.81 | 22.1  | 0.33  | 0.85  | 4.43  | 3.78   |
| PPUTLS46_001527 | ABC transporter ATP-binding protein              | 21.14 | 21.2  | 21.09 | 20.92 | 20.7  | 20.56 | -0.02 | -0.04 | 0.81  | 1.23   |
| PPUTLS46_003497 | type VI secretion system effector, Hcp1 family   | 21.13 | 21.37 | 21.8  | 21.22 | 21.64 | 22.63 | 0.1   | 0.27  | 1.16  | 1.28   |
| PPUTLS46_012998 | trans-2-enoyl-CoA reductase                      | 21.13 | 21.4  | 21    | 20.6  | 21.43 | 20.68 | -0.17 | 0.05  | 1.51  | 1.03   |
| PPUTLS46_011985 | adenylosuccinate lyase                           | 21.12 | 19.88 | 19.77 | 19.8  | 20.21 | 18.27 | -0.3  | -0.25 | 1.57  | 0.79   |
| PPUTLS46_016524 | glycyl-tRNA ligase subunit beta                  | 21.11 | 20.6  | 20.89 | 20.62 | 20.44 | 20.14 | -0.03 | -0.12 | 1.64  | 2.02   |
| PPUTLS46_017909 | transcription termination factor Rho             | 21.1  | 20.2  | 21.55 | 20.74 | 20.67 | 20.33 | 0.07  | 0.23  | 0.92  | 0.46   |
| PPUTLS46_002972 | saccharopine dehydrogenase                       | 21.1  | 20.51 | 19.75 | 19.2  | 20.34 | 20.19 | -1.07 | -0.1  | 6.09  | 1.91   |
| PPUTLS46_007326 | Uncharacterized protein conserved in bacteria    | 21.09 | 20.89 | 20.59 | 19    | 21.48 | 21.38 | -0.34 | 0.56  | 1.37  | 5.51   |
| PPUTLS46_000015 | DEAD-box ATP dependent DNA helicase              | 21.08 | 20.37 | 20.26 | 19.65 | 19.42 | 18.55 | -0.45 | -0.84 | 2.59  | 2.63   |

|                 |                                                  |       |       |       |       |       |       |       |       |        |       |
|-----------------|--------------------------------------------------|-------|-------|-------|-------|-------|-------|-------|-------|--------|-------|
| PPUTLS46_006186 | HfiC protein                                     | 21.06 | 21.32 | 21.26 | 21.43 | 21.32 | 20.8  | 0.44  | 0.05  | 0.27   | 1.04  |
| PPUTLS46_019851 | Uncharacterized protein conserved in bacteria    | 21.06 | 20    | 16.19 | 15.68 | 19.54 | 20.17 | -4.04 | -0.05 | 10.3   | 1.11  |
| PPUTLS46_010569 | bacterial translation initiation factor 3        | 21.04 | 20.84 | 20.99 | 20.52 | 20.74 | 20.55 | -0.07 | 0.03  | 1.66   | 1.04  |
| PPUTLS46_022681 | multifunctional aminopeptidase A                 | 21.03 | 20    | 22.81 | 21.92 | 21.32 | 19.37 | 1.21  | 0.75  | 3      | 0.44  |
| PPUTLS46_023978 | 50S ribosomal protein L29                        | 21.03 | 17.75 | 20.52 | 19.21 | 19.7  | 16.37 | 0.95  | -1.78 | 0.52   | 0.36  |
| PPUTLS46_021401 | phosphoribosylaminoimidazole-succinocarboxamide  | 21.03 | 17.28 | 20.76 | 20.21 | 18.7  | 18.47 | 0.14  | -0.64 | 0.95   | 0.7   |
| PPUTLS46_007146 | Cell division protease ftsH                      | 21.01 | 20.4  | 20.58 | 20.36 | 19.81 | 19.69 | -0.1  | -0.48 | 1.85   | 4.23  |
| PPUTLS46_017819 | hypothetical protein                             | 21    | 21.48 | 19.53 | 18.39 | 21.14 | 21.24 | -1.52 | 0.26  | 2.87   | 0.61  |
| PPUTLS46_004149 | ribonuclease activity regulator protein RraA     | 20.98 | 19.88 | 20.67 | 19.85 | 21.63 | 20.21 | -0.33 | 0.28  | 0.38   | 0.75  |
| PPUTLS46_004114 | NAD-glutamate dehydrogenase                      | 20.98 | 20.87 | 22.05 | 21.84 | 19.06 | 19.15 | 0.81  | -1.2  | 5.16   | 6.37  |
| PPUTLS46_024008 | 50S ribosomal protein L23                        | 20.97 | 19.86 | 20.12 | 20.26 | 20.09 | 19.33 | -0.01 | -0.19 | 1.08   | 0.66  |
| PPUTLS46_021936 | 17 kDa surface antigen                           | 20.96 | 21.03 | 21.61 | 21.25 | 21.47 | 21.32 | 0.23  | 0.39  | 1.7    | 2.23  |
| PPUTLS46_001072 | Protein of unknown function (DUF1302)            | 20.96 | 20.53 | 22.19 | 21.62 | 20.17 | 20.16 | 0.95  | -0.18 | 5.75   | 3.19  |
| PPUTLS46_021986 | OmpA/MotB domain protein                         | 20.94 | 20.61 | 22.98 | 23.36 | 20.51 | 22.45 | 1.78  | 0.11  | 4.1    | 0.94  |
| PPUTLS46_026006 | catalse/hydroperoxidase HPI(I)                   | 20.93 | 20.5  | 23.49 | 23.22 | 20.93 | 20.92 | 2.51  | 0.38  | 44.88  | 4.56  |
| PPUTLS46_025228 | cystine transporter subunit                      | 20.93 | 19.27 | 22.4  | 22.01 | 20.11 | 19.92 | 1.34  | 0.29  | 2.68   | 0.69  |
| PPUTLS46_021151 | cysteine synthase A                              | 20.93 | 20.69 | 21.06 | 21    | 18.63 | 20.39 | 0.07  | 0.01  | 0.82   | 0.99  |
| PPUTLS46_013428 | 30S ribosomal protein S9                         | 20.92 | 20.95 | 21.32 | 21.18 | 21.14 | 19.89 | 0.04  | -0.02 | 1.03   | 0.94  |
| PPUTLS46_026201 | glycolate oxidase subunit GlcD                   | 20.92 | 19.44 | 21.91 | 21.33 |       |       | 0.76  |       | 2.04   | 3.46  |
| PPUTLS46_001497 | ATP-dependent protease                           | 20.91 | 20.62 | 21.24 | 20.89 | 20.55 | 20.57 | 0.25  | 0.1   | 5.09   | 0.44  |
| PPUTLS46_014614 | acetyl-CoA carboxylase carboxyltransferase       | 20.91 | 20.59 | 20.94 | 20.5  | 19.94 | 20.08 | 0.02  | -0.24 | 1.16   | 2.38  |
| PPUTLS46_007111 | dihydrodipicolinate reductase                    | 20.89 | 20.83 | 20.07 | 20.24 | 20.03 | 20.06 | -0.25 | -0.27 | 1.63   | 2.3   |
| PPUTLS46_013393 | Uncharacterized protein conserved in bacteria    | 20.87 | 20.4  | 20.6  | 20.03 | 19.68 | 19.53 | -0.12 | -0.62 | 1.77   | 10.66 |
| PPUTLS46_026206 | glycolate oxidase FAD binding subunit            | 20.87 | 20.19 | 21.35 | 20.58 |       |       | 0.04  |       | 1.04   | 13.82 |
| PPUTLS46_003552 | type VI secretion protein, EvpB/VC_A0108 family  | 20.86 | 20.78 | 20.51 | 19.72 | 21.2  | 21.83 | -0.38 | 0.4   | 1.99   | 1.68  |
| PPUTLS46_024133 | N-acetyl-gamma-glutamyl-phosphate reductase      | 20.86 | 19.99 | 20.46 | 20.77 | 20.75 | 20.74 | 0.06  | 0.29  | 0.94   | 1.76  |
| PPUTLS46_015384 | fumarate hydratase                               | 20.86 | 19.3  | 21.68 | 20.06 | 19.74 | 18.78 | 0.53  | -0.38 | 0.6    | 0.57  |
| PPUTLS46_025403 | argininosuccinate lyase                          | 20.86 | 19.35 | 20.57 | 20.35 | 19.72 | 18.39 | 0.06  | -0.33 | 0.96   | 0.68  |
| PPUTLS46_005806 | S-adenosylmethionine synthetase                  | 20.85 | 19.68 | 20.71 | 19.82 | 20.62 | 20.49 | -0.51 | 0.13  | 0.16   | 1.19  |
| PPUTLS46_006551 | bifunctional                                     | 20.85 | 21.35 | 20.58 | 20.37 | 20.41 | 20.75 | -0.17 | -0.31 | 1.37   | 0.49  |
| PPUTLS46_025488 | type I secretion C-terminal target domain        | 20.84 | 21.25 | 21.42 | 20.92 | 22.68 | 22.35 | 0.04  | 1.17  | 0.98   | 3.16  |
| PPUTLS46_019926 | coproporphyrinogen III oxidase                   | 20.84 | 21.02 |       |       | 19.67 | 19.04 |       | -0.82 | 11.78  | 2.75  |
| PPUTLS46_001807 | hypothetical protein                             | 20.83 | 20.14 | 18.84 | 18.52 | 20.24 | 19.13 | -1.57 | -0.04 | 9.4    | 0.89  |
| PPUTLS46_008644 | copper-translocating P-type ATPase               | 20.82 | 19.88 | 20.64 | 20.11 | 20.06 | 20.13 | -0.19 | 0.08  | 0.41   | 0.87  |
| PPUTLS46_022911 | rod shape-determining protein MreB               | 20.81 | 20.61 | 20.21 | 19.79 | 20.37 | 20.13 | -0.56 | -0.08 | 5.48   | 1.8   |
| PPUTLS46_015444 | DNA gyrase subunit A                             | 20.81 | 20.87 | 20.91 | 20.95 | 19.92 | 20.28 | 0.35  | 0.01  | 0.18   | 1.04  |
| PPUTLS46_015644 | 2-dehydro-3-deoxyphosphoacetate aldolase         | 20.8  | 19.53 | 19.69 | 19.49 | 19.18 | 21.38 | -0.19 | 0.17  | 1.39   | 0.92  |
| PPUTLS46_015709 | alcohol dehydrogenase                            | 20.77 | 20.6  | 20.71 | 20.22 | 20.39 | 20.31 | -0.09 | 0     | 1.72   | 0.82  |
| PPUTLS46_013568 | preprotein translocase subunit SecA              | 20.77 | 19.71 | 19.58 | 19.77 | 18.77 | 19.41 | -0.21 | -0.34 | 1.41   | 1.54  |
| PPUTLS46_015129 | FKBP-type peptidylprolyl isomerase               | 20.76 | 20.97 | 21.16 | 20.94 | 20.53 | 21.03 | 0.11  | 0.44  | 0.78   | 0.28  |
| PPUTLS46_014154 | phosphoribosylglycinamide formyltransferase 2    | 20.76 | 19.14 | 19.74 | 19.91 | 19.64 | 20.08 | 0.03  | 0.08  | 0.99   | 0.94  |
| PPUTLS46_021416 | dihydrodipicolinate synthase                     | 20.75 | 18.95 | 19.75 | 18.86 | 20.58 | 18.99 | -0.24 | 1.2   | 0.72   | 0.13  |
| PPUTLS46_016249 | NLPA lipoprotein                                 | 20.74 | 21.15 | 21.12 | 21.34 | 20.63 | 20.66 | 0.4   | -0.19 | 0.44   | 0.58  |
| PPUTLS46_005266 | glutamate synthase subunit beta                  | 20.74 | 20.3  | 19.7  | 19.95 | 20.51 | 20.69 | -0.28 | 0.16  | 1.67   | 1.6   |
| PPUTLS46_006171 | RNA-binding protein Hfq                          | 20.74 | 20.65 | 20.64 | 20.07 | 19.81 | 18.5  | -0.15 | -0.56 | 1.7    | 1.74  |
| PPUTLS46_024183 | indole-3-glycerol-phosphate synthase             | 20.74 | 19.88 | 20.63 | 19.13 | 19.51 | 19.6  | -0.38 | -0.17 | 0.59   | 1.55  |
| PPUTLS46_000325 | aromatic amino acid aminotransferase             | 20.73 | 20.4  | 19.89 | 20.25 | 20.39 | 19.38 | -0.01 | 0.01  | 1.08   | 1.03  |
| PPUTLS46_014339 | lysyl-tRNA ligase                                | 20.73 | 20.18 | 20.32 | 19.96 | 19.87 | 19.7  | -0.21 | -0.24 | 3.18   | 3.34  |
| PPUTLS46_015224 | septum site-determining protein MinD             | 20.72 | 20.54 | 21.05 | 20.43 | 21.76 | 20.6  | 0.04  | 0.28  | 1.03   | 1.36  |
| PPUTLS46_014224 | threonine synthase                               | 20.72 | 19.29 | 20.67 | 20    | 18.67 | 19.88 | 0.28  | -0.01 | 0.63   | 1.04  |
| PPUTLS46_024078 | transcription antitermination protein NusG       | 20.71 | 21.03 | 18.93 | 20.25 | 20.43 | 20.68 | 0.02  | -0.33 | 0.99   | 0.31  |
| PPUTLS46_012450 | bifunctional NADH:ubiquinone oxidoreductase      | 20.7  | 20.75 | 21.04 | 20.54 | 20.86 | 20.69 | 0.04  | 0.11  | 1.04   | 1.3   |
| PPUTLS46_022821 | RpoX                                             | 20.7  | 20.61 | 20.15 | 19.27 | 20.59 | 20.27 | -0.53 | 0.04  | 2.2    | 1.06  |
| PPUTLS46_021591 | prolyl-tRNA ligase                               | 20.69 | 21.04 | 20.63 | 20.82 | 20.59 | 21.54 | -0.38 | 0.44  | 0.33   | 0.53  |
| PPUTLS46_016179 | cytochrome c4                                    | 20.69 | 19.92 | 21.42 | 21.27 | 19.39 | 20.22 | 0.77  | -0.01 | 3.66   | 0.94  |
| PPUTLS46_005361 | phosphoglyceromutase                             | 20.67 | 20.28 | 20    | 19.71 | 19.87 | 19.07 | -0.57 | -0.31 | 18.94  | 1.76  |
| PPUTLS46_004209 | ribosome modulation factor                       | 20.66 | 19.28 | 20.49 | 19.25 | 20.66 | 20.01 | -0.78 | 0.15  | 0.14   | 0.84  |
| PPUTLS46_014659 | S-(hydroxymethyl)glutathione dehydrogenase       | 20.66 | 19.66 | 19.69 | 19.1  | 18.95 | 19.67 | -0.33 | -0.13 | 1.86   | 1.23  |
| PPUTLS46_000400 | 3-isopropylmalate dehydrogenase                  | 20.65 | 20.76 | 18.72 | 19.09 | 20.71 | 20.42 | -1.13 | 0.03  | 2.86   | 1     |
| PPUTLS46_022926 | aspartyl/glutamyl-tRNA amidotransferase subunit  | 20.64 | 20.77 | 20.33 | 20.15 | 20.46 | 20.67 | -0.16 | 0.3   | 1.55   | 0.34  |
| PPUTLS46_006691 | leucyl-tRNA ligase                               | 20.64 | 20.35 | 19.41 | 19.08 | 19.92 | 19.91 | -1.17 | -0.17 | 23.73  | 2.93  |
| PPUTLS46_024358 | RNA polymerase sigma factor RpoD                 | 20.64 | 21.38 | 20.92 | 20.88 | 19.9  | 19.95 | -0.26 | -0.13 | 0.6    | 1.22  |
| PPUTLS46_004399 | multifunctional fatty acid oxidation complex     | 20.63 | 20.5  | 20.1  | 19.23 | 25.57 | 25.39 | -0.5  | 4.68  | 2.18   | 30.61 |
| PPUTLS46_023693 | 6,7-dimethyl-8-ribityllumazine synthase          | 20.63 | 20.22 | 21.99 | 21.7  | 20.64 | 19.99 | 1.34  | 0.1   | 35.23  | 0.79  |
| PPUTLS46_020676 | bifunctional                                     | 20.63 | 20    | 20.25 | 19.86 | 19.37 | 19.38 | -0.11 | -0.44 | 1.89   | 3.35  |
| PPUTLS46_007086 | ferric uptake regulation protein                 | 20.63 | 18.15 | 21.62 | 21.03 | 19.22 | 17.04 | 0.78  | -0.98 | 1.58   | 0.48  |
| PPUTLS46_022746 | bifunctional histidinol dehydrogenase/           | 20.61 | 19.47 | 19.67 | 19.97 | 19.53 | 19.12 | 0     | -0.04 | 1.05   | 0.88  |
| PPUTLS46_005631 | ATP-dependent protease ATP-binding subunit HslU  | 20.59 | 20.14 | 19.87 | 19.27 | 20.15 | 19.98 | -0.55 | 0.01  | 3.64   | 0.73  |
| PPUTLS46_013343 | AapJ                                             | 20.59 | 20.25 | 24.23 | 23.9  | 17.54 | 16.87 | 3.52  | -2.4  | 133.87 | 7.91  |
| PPUTLS46_006646 | serine-type D-Ala-D-Ala carboxypeptidase         | 20.58 | 20.38 | 20.93 | 20.31 | 19.82 | 19.03 | 0.04  | -0.38 | 1.05   | 1.92  |
| PPUTLS46_006546 | phosphoribosylamine-glycine ligase               | 20.58 | 19.9  | 19.85 | 20.16 | 19.05 | 19.88 | 0.01  | -0.04 | 0.96   | 1.1   |
| PPUTLS46_022196 | MIP family channel protein                       | 20.58 | 20.4  | 17.84 | 17.78 | 18.99 | 18.96 | -2.35 | -1.01 | 10.55  | 8.3   |
| PPUTLS46_014694 | RNA polymerase sigma factor RpoS                 | 20.58 | 19.16 | 14.33 | 16.59 | 17    | 16.99 | -2.52 | -1.76 | 2.19   | 3.59  |
| PPUTLS46_016689 | UDP-N-acetylglycosamine pyrophosphorylase        | 20.56 | 20.19 | 20.56 | 20.32 | 19.55 | 19.86 | 0.06  | -0.1  | 0.59   | 1.42  |
| PPUTLS46_024508 | malate synthase G                                | 20.55 | 20.17 | 19.52 | 18.81 | 23.3  | 23.07 | -0.86 | 2.84  | 3.98   | 47.08 |
| PPUTLS46_011185 | carbon storage regulator                         | 20.53 | 20.28 | 21.5  | 21.04 | 21.26 | 21.34 | 0.72  | 0.93  | 6.27   | 6.35  |
| PPUTLS46_015459 | bifunctional cyclohexadienyl dehydrogenase/      | 20.53 | 20.25 | 20.13 | 20.02 | 20.14 | 18.59 | -0.12 | -0.05 | 1.83   | 1.08  |
| PPUTLS46_024448 | acyl-CoA dehydrogenase                           | 20.52 | 15.78 | 21.11 | 19.01 | 24.21 | 24.44 | 0.83  | 3.57  | 0.73   | 2.81  |
| PPUTLS46_016684 | FOF1 ATP synthase subunit epsilon                | 20.52 | 20.99 | 21.05 | 21.87 | 21.88 | 20.02 | 0.42  | 0.03  | 0.64   | 1     |
| PPUTLS46_007116 | carbamoyl phosphate synthase small subunit       | 20.52 | 20.16 | 20.43 | 19.97 | 18.96 | 18.28 | -0.05 | -1.01 | 1.74   | 3.91  |
| PPUTLS46_005121 | thiazole synthase                                | 20.52 | 19.36 | 18.83 | 18.6  | 18.81 | 18.54 | -0.78 | -0.43 | 2.7    | 1.86  |
| PPUTLS46_014269 | gamma-aminobutyraldehyde dehydrogenase           | 20.51 | 19.73 | 20.72 | 20.7  | 20.13 | 20.45 | 0.32  | 0.18  | 1.85   | 1.35  |
| PPUTLS46_006191 | ATP phosphoribosyltransferase regulatory subunit | 20.51 | 19.64 | 19.75 | 19.6  | 18.71 | 19.14 | -0.17 | -0.43 | 1.6    | 1.91  |
| PPUTLS46_003902 | scaffold protein                                 | 20.51 | 19.5  | 17.45 | 17.51 | 18.67 | 18.33 | -2.02 | -0.7  | 5.18   | 2.66  |
| PPUTLS46_001842 | isoleucyl-tRNA ligase                            | 20.5  | 20.32 | 20.24 | 20    | 19.68 | 19.65 | -0.14 | -0.29 | 2.19   | 3.23  |

|                 |                                                  |       |       |       |       |       |       |       |       |       |       |
|-----------------|--------------------------------------------------|-------|-------|-------|-------|-------|-------|-------|-------|-------|-------|
| PPUTLS46_009594 | methyl-accepting chemotaxis sensory transducer   | 20.49 | 20.46 | 20.22 | 20.78 | 20.67 | 21.12 | -0.46 | 0.22  | 0.33  | 1.42  |
| PPUTLS46_016174 | thiol:disulfide interchange protein DsbA         | 20.49 | 19.33 | 21.2  | 20.97 | 19.35 | 17.99 | 0.74  | 0.01  | 2.47  | 0.98  |
| PPUTLS46_006736 | glutamate-1-semialdehyde aminotransferase        | 20.47 | 19.84 | 19.41 | 18.68 | 20.04 | 19.76 | -0.73 | -0.12 | 3.17  | 0.22  |
| PPUTLS46_016334 | oligopeptidase A                                 | 20.47 | 19.45 | 19.9  | 20.15 | 19.59 | 17.21 | 0.05  | -0.08 | 0.96  | 0.93  |
| PPUTLS46_006686 | rare lipoprotein B                               | 20.46 | 20.73 | 21.09 | 21.45 | 20.29 | 19.87 | 0.07  | -0.03 | 0.93  | 1.12  |
| PPUTLS46_025188 | peroxidase                                       | 20.46 | 20.41 | 20.69 | 20.94 | 20.09 | 20.69 | 0.18  | 0.3   | 0.7   | 0.5   |
| PPUTLS46_015664 | lipopolysaccharide biosynthesis protein          | 20.46 | 19.12 | 20.55 | 20.03 | 19.38 | 19.38 | 0.05  | -0.1  | 0.96  | 0.8   |
| PPUTLS46_004007 | phosphonate ABC transporter periplasmic          | 20.45 | 19.51 | 20.87 | 20.6  | 19.31 | 19.04 | 0.45  | -0.13 | 2.21  | 1.41  |
| PPUTLS46_000455 | amidophosphoribosyltransferase                   | 20.44 | 19.38 | 19.49 | 18.88 | 19.15 | 18.76 | -0.26 | -0.16 | 1.62  | 1.4   |
| PPUTLS46_022921 | aspartyl/glutamyl-tRNA amidotransferase subunit  | 20.44 | 18.53 | 19.64 | 18.67 | 17.47 | 18.97 | -0.48 | -0.21 | 0.52  | 1.16  |
| PPUTLS46_007914 | aldo/keto reductase                              | 20.43 | 19.75 | 18.32 | 19.13 | 18.77 | 19.52 | -0.58 | -0.18 | 1.67  | 1.33  |
| PPUTLS46_012460 | NADH dehydrogenase I subunit F                   | 20.42 | 19.64 | 21.41 | 20.62 | 19.99 | 19.74 | 0.53  | 0.16  | 2.14  | 0.54  |
| PPUTLS46_009719 | aconitate hydratase                              | 20.41 | 20.18 | 20.29 | 19.82 | 19.94 | 20.34 | -0.12 | 0.21  | 2.08  | 0.53  |
| PPUTLS46_023888 | 50S ribosomal protein L17                        | 20.37 | 19.06 | 21.05 | 19.95 | 21.07 | 19.01 | 0.12  | 0.73  | 0.89  | 0.5   |
| PPUTLS46_013173 | 2-hydroxyacid dehydrogenase                      | 20.36 | 19.96 | 18.42 | 18.78 | 17.52 | 18.19 | -1.02 | -1.37 | 2.92  | 3.59  |
| PPUTLS46_025746 | isoquinoline 1-oxidoreductase, beta subunit      | 20.34 | 20.86 | 21.6  | 20.47 | 17.19 | 14.95 | 0.14  | -2.7  | 1.13  | 2.81  |
| PPUTLS46_026216 | Uncharacterized protein, possibly involved in    | 20.3  | 17.92 | 21.1  | 18.98 |       |       | 1.02  |       | 0.47  | 1.33  |
| PPUTLS46_004229 | Uncharacterized protein conserved in bacteria    | 20.27 | 17.46 | 19.14 | 19.29 | 18.35 | 16.87 | 0.12  | -0.75 | 0.94  | 0.57  |
| PPUTLS46_013458 | transport-associated protein                     | 20.26 | 19.78 | 20.21 | 19.82 | 19.54 | 18.9  | -0.01 | -0.18 | 0.5   | 1.6   |
| PPUTLS46_008589 | copper resistance B                              | 20.25 | 20.19 | 19.35 | 18.96 | 16.57 | 15.2  | -0.84 | -3    | 5.33  | 4.59  |
| PPUTLS46_022756 | UDP-N-acetylglucosamine                          | 20.24 | 19.69 | 20.11 | 19.68 | 19.68 | 19.23 | 0     | 0.02  | 0.75  | 1.06  |
| PPUTLS46_024403 | pyrroloquinoline quinone biosynthesis protein    | 20.24 | 19.05 | 19.51 | 19.78 |       |       | 0.02  |       | 0.98  | 3.7   |
| PPUTLS46_010589 | phenylalanyl-tRNA ligase subunit beta            | 20.23 | 19.73 | 20.57 | 20.25 | 19.24 | 19.8  | 0.34  | -0.04 | 5.32  | 0.86  |
| PPUTLS46_006606 | gamma-glutamyl phosphate reductase               | 20.22 | 19.17 | 18.68 | 18.27 | 19.71 | 19.11 | -0.8  | -0.43 | 3.03  | 0.16  |
| PPUTLS46_011945 | ATP-dependent Clp protease ATP-binding subunit   | 20.2  | 19.68 | 18.14 | 18.71 | 18.78 | 17.32 | -0.84 | -0.71 | 2.23  | 1.84  |
| PPUTLS46_019696 | electron-transferring-flavoprotein dehydrogenase | 20.19 | 19.65 | 20.23 | 19.85 | 23.76 | 23.59 | 0.05  | 3.64  | 0.84  | 32.11 |
| PPUTLS46_000420 | peptidoglycan-binding LysM                       | 20.19 | 20.31 | 20.72 | 20.41 | 20.82 | 20.12 | 0.1   | 0.21  | 1.24  | 1.35  |
| PPUTLS46_025378 | HemY domain-containing protein                   | 20.19 | 19.28 | 20.96 | 20.32 | 19.7  | 19.05 | 0.48  | -0.36 | 2.11  | 0.2   |
| PPUTLS46_005926 | carbamoyltransferase                             | 20.19 | 19.65 | 20.44 | 19.7  | 19.18 | 19    | 0.19  | -0.4  | 0.53  | 4.59  |
| PPUTLS46_001097 | Zn-dependent protease with chaperone function    | 20.18 | 20.73 | 20.77 | 20.37 | 20.48 | 20.52 | 0.09  | 0.19  | 0.9   | 0.74  |
| PPUTLS46_017809 | nitrogen regulatory protein P-II                 | 20.18 | 19.33 | 23.3  | 22.85 | 19.99 | 20.08 | 2.93  | 0.27  | 10.56 | 1.67  |
| PPUTLS46_006236 | 30S ribosomal protein S18                        | 20.17 | 20.06 | 21.16 | 20.4  | 21.03 | 19.8  | 0.38  | 0.1   | 1.91  | 1.09  |
| PPUTLS46_017429 | 50S ribosomal protein L28                        | 20.17 | 19.34 | 19.57 | 20.35 | 18.18 | 18.8  | 0.2   | -0.46 | 0.82  | 1.83  |
| PPUTLS46_014289 | extracellular solute-binding protein             | 20.15 | 19.31 | 22.01 | 21.18 | 19.79 | 20.36 | 1.33  | 0.25  | 3.7   | 1.39  |
| PPUTLS46_021491 | translocation protein TolB                       | 20.15 | 20.24 | 20.06 | 19.96 | 19.38 | 19.65 | -0.06 | 0.02  | 0.72  | 0.98  |
| PPUTLS46_003907 | cysteine desulfurase                             | 20.14 | 20.32 | 19.07 | 18.56 | 18.22 | 17.71 | -1.05 | -1.47 | 3.92  | 4.44  |
| PPUTLS46_001272 | GTP-binding protein YchF                         | 20.13 | 16.4  | 19.28 | 19.34 | 19.68 | 17.94 | 0.04  | 1.37  | 0.99  | 0.45  |
| PPUTLS46_016589 | DNA polymerase III subunit beta                  | 20.11 | 19.12 | 20.5  | 19.35 | 20.66 | 19.81 | 0.48  | 0.23  | 0.4   | 1.31  |
| PPUTLS46_013473 | LppC family lipoprotein                          | 20.11 | 20.04 | 20.19 | 20.01 | 19.54 | 19.94 | -0.09 | -0.26 | 0.43  | 0.29  |
| PPUTLS46_015154 | carboxyl-terminal protease                       | 20.11 | 19.25 | 20.66 | 20.81 | 19.46 | 18.93 | 0.64  | -0.18 | 2.26  | 0.51  |
| PPUTLS46_023568 | inorganic pyrophosphatase                        | 20.1  | 21.08 | 20.97 | 19.71 | 21.4  | 21.3  | -0.02 | 0.27  | 1.04  | 1.27  |
| PPUTLS46_013548 | cell division protein FtsA                       | 20.08 | 20.06 | 20.17 | 20.33 | 19.96 | 19.65 | 0.32  | 0.03  | 0.35  | 1.01  |
| PPUTLS46_009314 | surface antigen (D15)                            | 20.08 | 20.32 | 19.58 | 19.75 | 19.83 | 20.37 | 0.02  | 0.49  | 1.02  | 0.23  |
| PPUTLS46_016944 | N5-carboxyaminoimidazole ribonucleotide mutase   | 20.08 | 19.61 | 19.66 | 19.56 | 18.36 | 18.61 | -0.07 | -0.75 | 1.53  | 3.87  |
| PPUTLS46_018661 | quinone oxidoreductase                           | 20.08 | 19.8  | 17.28 | 16.7  | 17.66 | 18.15 | -2.67 | -1.22 | 14.1  | 3.97  |
| PPUTLS46_001077 | long-chain-fatty-acid--CoA ligase                | 20.08 | 17.6  | 20.89 | 20.7  | 16.62 | 16.44 | 0.9   | -0.7  | 1.67  | 1.53  |
| PPUTLS46_004559 | transaldolase B                                  | 20.07 | 19.09 | 19.33 | 19.67 | 20.03 | 18.84 | 0     | 0.59  | 0.95  | 0.3   |
| PPUTLS46_014369 | OmpA/MotB domain-containing protein              | 20.07 | 19.71 | 19.71 | 19.3  | 16.7  | 17.01 | -0.3  | -2.26 | 6.01  | 8.54  |
| PPUTLS46_013768 | Toluene efflux pump outer membrane protein ttgC  | 20.06 | 19.79 | 20.09 | 19.82 | 19.73 | 19.46 | 0     | 0     | 0.55  | 1.31  |
| PPUTLS46_015634 | hypothetical protein                             | 20.06 | 19.31 | 15.31 | 15.35 | 19.27 | 19.41 | -3.89 | 0.01  | 11.57 | 0.95  |
| PPUTLS46_005516 | extracellular solute-binding protein             | 20.05 | 20.38 | 20.76 | 20.17 | 19.53 | 19.44 | 0.08  | -0.06 | 1.12  | 1.2   |
| PPUTLS46_022741 | histidinol-phosphate aminotransferase            | 20.05 | 19.12 | 17.35 | 18.14 | 19.38 | 17.25 | -1.02 | -0.18 | 2.11  | 0.85  |
| PPUTLS46_024273 | organic solvent tolerance protein                | 20.05 | 19.81 | 20.27 | 20.1  | 18.8  | 19.79 | 0.09  | -0.16 | 1.41  | 0.75  |
| PPUTLS46_006026 | TolC family type I secretion outer membrane      | 20.04 | 19.82 | 20.86 | 20.59 | 21.44 | 21.58 | 0.67  | 1.52  | 6.88  | 7.99  |
| PPUTLS46_024278 | Chaperone surA                                   | 20.04 | 20.45 | 20.14 | 19.68 | 19.36 | 19.23 | -0.05 | -0.22 | 1.18  | 1.48  |
| PPUTLS46_002842 | glutamyl-tRNA ligase                             | 20.04 | 19.38 | 19.88 | 18.47 | 19.32 | 19.99 | -0.17 | 0.07  | 0.78  | 0.93  |
| PPUTLS46_020811 | nitroreductase                                   | 20.04 | 19.9  | 20.09 | 20.32 | 18.22 | 19.54 | 0.25  | -0.01 | 0.53  | 0.96  |
| PPUTLS46_022471 | glucose-6-phosphate 1-dehydrogenase              | 20.04 | 18.05 | 19.71 | 19.41 |       |       | 0.1   |       | 0.92  | 1.51  |
| PPUTLS46_015449 | 3-phosphoserine/phosphohydroxythreonine          | 20.03 | 19.95 | 18.62 | 18.93 | 19.77 | 19.81 | -0.65 | 0.17  | 2.27  | 0.4   |
| PPUTLS46_013998 | protease Do                                      | 20.02 | 19.62 | 19.78 | 19.62 | 18.18 | 19.4  | 0     | 0     | 1.25  | 1.04  |
| PPUTLS46_017099 | hypothetical protein                             | 20    | 20.44 | 17.04 | 17.07 | 19.76 | 19.16 | -2.51 | -0.13 | 5.44  | 1.27  |
| PPUTLS46_009554 | ATP-dependent protease La                        | 19.99 | 20.67 | 20    | 20.07 | 20.23 | 19.11 | -0.23 | -0.07 | 0.64  | 1.1   |
| PPUTLS46_018089 | spermidine/putrescine ABC transporter ATPase     | 19.98 | 19.26 | 20.34 | 20.14 | 19.47 | 20.18 | 0.42  | 0.12  | 2.67  | 1.14  |
| PPUTLS46_016459 | alcohol dehydrogenase                            | 19.98 | 18.63 | 21.23 | 21.46 | 18.91 | 18.33 | 1.36  | -0.22 | 2.81  | 0.65  |
| PPUTLS46_000540 | aminopeptidase N                                 | 19.97 | 20.98 | 20.51 | 20.95 | 20.27 | 20.85 | 0.69  | 0.6   | 0.38  | 0.44  |
| PPUTLS46_014384 | phosphoenolpyruvate carboxylase                  | 19.97 | 18.87 | 20.46 | 20.43 | 19.42 | 18.76 | 0.6   | -0.45 | 2.14  | 0.19  |
| PPUTLS46_005646 | aspartate carbamoyltransferase catalytic subunit | 19.97 | 17.13 | 19.31 | 19.35 | 18.86 | 19.44 | 0.04  | 0.04  | 1.01  | 1     |
| PPUTLS46_012750 | hypothetical protein                             | 19.96 | 20.26 | 20.99 | 18.88 | 20.11 | 20.5  | -0.21 | 0.16  | 0.84  | 0.76  |
| PPUTLS46_013558 | UDP-3-O-[3-hydroxymyristoyl] N-acetylglucosamine | 19.96 | 19.13 | 19.87 | 18.86 | 19.5  | 19.6  | -0.33 | 0.09  | 0.39  | 1.16  |
| PPUTLS46_000390 | isopropylmalate isomerase small subunit          | 19.96 | 20.78 | 20.16 | 19.63 | 19.41 | 20.61 | -0.07 | -1.05 | 1.14  | 0.1   |
| PPUTLS46_010169 | alkylhydroperoxidase-like protein                | 19.95 | 17.02 | 20.4  | 19.59 | 18.58 | 17.24 | 0.17  | -1.16 | 1.08  | 0.36  |
| PPUTLS46_006926 | alcohol dehydrogenase                            | 19.94 | 18.82 | 19.65 | 19.39 | 18.93 | 19.17 | 0.09  | -0.01 | 0.87  | 0.93  |
| PPUTLS46_022986 | NADH:flavin oxidoreductase                       | 19.94 | 19.26 |       |       | 17.15 | 17.5  |       | -1.49 | 14.88 | 4.93  |
| PPUTLS46_001522 | glutamate dehydrogenase                          | 19.93 | 19.22 |       |       | 20.65 | 20.34 |       | 0.87  | 13.3  | 4.38  |
| PPUTLS46_024823 | glycine betaine/L-proline ABC transporter,       | 19.93 | 19.07 | 21.91 | 21.57 | 19.29 | 17.04 | 1.91  | -0.14 | 7.48  | 0.88  |
| PPUTLS46_001147 | hypothetical protein                             | 19.92 | 20.28 | 19.79 | 19.86 | 19.52 | 20.45 | -0.18 | 0.7   | 0.62  | 0.22  |
| PPUTLS46_018084 | extracellular solute-binding protein             | 19.92 | 19.92 | 20.61 | 20.43 | 19.27 | 18.54 | 0.34  | -0.37 | 2.23  | 1.87  |
| PPUTLS46_003952 | preprotein translocase subunit YajC              | 19.9  | 20.23 | 19.26 | 19.03 | 20.65 | 19.83 | -0.5  | 0.15  | 2.2   | 1.19  |
| PPUTLS46_013573 | bifunctional ornithine                           | 19.9  | 18.4  | 18.23 | 19.06 | 19.82 | 19.46 | -0.05 | 0.08  | 1.07  | 1.07  |
| PPUTLS46_005581 | ubiquinone/menaquinone biosynthesis              | 19.9  | 19.86 | 20.2  | 19.71 | 19.47 | 19.02 | 0.05  | -0.15 | 1.1   | 1.59  |
| PPUTLS46_009544 | ATP-dependent Clp protease proteolytic subunit   | 19.89 | 20.12 | 21.41 | 20.19 | 19.62 | 20.8  | 0.3   | 0.46  | 1.34  | 0.56  |
| PPUTLS46_006221 | ribonuclease R                                   | 19.89 | 19.52 | 19.97 | 19.52 | 19.61 | 19.8  | 0.04  | 0.08  | 0.88  | 1.24  |
| PPUTLS46_024613 | methionine sulfoxide reductase A                 | 19.89 | 17.32 | 19.05 | 18.79 | 19.04 | 19.09 | 0.25  | 0.19  | 0.84  | 0.89  |
| PPUTLS46_019651 | lipid-binding START domain-containing protein    | 19.88 | 19.2  | 19.22 | 19.73 | 22.77 | 21.67 | -0.11 | 2.11  | 0.79  | 4.09  |
| PPUTLS46_014089 | glucose dehydrogenase                            | 19.88 | 18.08 | 21.38 | 20.61 | 20.48 | 20.74 | 1.08  | 1.02  | 2.13  | 2.01  |

|                 |                                                  |       |       |       |       |       |       |       |       |       |       |
|-----------------|--------------------------------------------------|-------|-------|-------|-------|-------|-------|-------|-------|-------|-------|
| PPUTLS46_015854 | enoyl-CoA hydratase                              | 19.87 | 18.63 | 18.07 | 18.05 | 21.7  | 20.53 | -0.71 | 1.12  | 2.27  | 2.22  |
| PPUTLS46_004534 | VacJ family lipoprotein                          | 19.87 | 19.46 | 21.35 | 20.54 | 19.36 | 19.91 | 0.89  | 0.1   | 3.25  | 0.84  |
| PPUTLS46_001677 | competence lipoprotein ComL                      | 19.87 | 19.56 | 20.46 | 19.08 | 18.13 | 18.19 | 0.3   | -1.04 | 0.67  | 8.62  |
| PPUTLS46_007161 | triosephosphate isomerase                        | 19.87 | 18.92 | 17.92 | 17.73 | 17.35 | 19.26 | -1.2  | 0.03  | 4.36  | 1     |
| PPUTLS46_017114 | DNA-directed RNA polymerase subunit omega        | 19.87 | 20.67 | 20.18 | 16.47 | 17.21 | 19.08 | -0.11 | -0.2  | 1.05  | 1.15  |
| PPUTLS46_004404 | 3-ketoacyl-CoA thiolase                          | 19.86 | 19.52 | 18.57 | 18.71 | 24.71 | 24.71 | -0.67 | 4.84  | 2.86  | 50.92 |
| PPUTLS46_016579 | DNA gyrase subunit B                             | 19.84 | 19.07 | 19.74 | 18.96 | 19.26 | 18.58 | -0.25 | -0.14 | 0.33  | 0.62  |
| PPUTLS46_024313 | Uncharacterized conserved protein                | 19.82 | 17.6  | 19.64 | 18.95 | 19.35 | 19.26 | 0.3   | 0.06  | 0.77  | 0.97  |
| PPUTLS46_011905 | seryl-tRNA ligase                                | 19.81 | 18.87 | 20.36 | 20.26 | 18.87 | 18.79 | 0.61  | 0.02  | 2.52  | 0.96  |
| PPUTLS46_014799 | arsenate reductase                               | 19.81 | 18.88 | 19.87 | 19.48 | 17.69 | 18.73 | 0.06  | -0.23 | 1.09  | 1.3   |
| PPUTLS46_014454 | cold-shock DNA-binding domain-containing protein | 19.81 | 19.38 |       |       |       |       |       |       | 82.88 | 47.5  |
| PPUTLS46_017949 | secretion protein HlyD family protein            | 19.8  | 19.65 | 20.8  | 20.58 | 19.87 | 19.54 | 0.78  | 0.14  | 5.61  | 1.56  |
| PPUTLS46_005741 | DEAD/DEAH box helicase                           | 19.8  | 19.28 | 19.74 | 19.62 | 19.01 | 18.6  | 0.03  | -0.22 | 1.03  | 2.19  |
| PPUTLS46_022771 | toluene tolerance family protein                 | 19.79 | 19.87 | 20.12 | 19.42 | 20.13 | 19.87 | 0.01  | 0.21  | 1.05  | 1.57  |
| PPUTLS46_005206 | 50S ribosomal protein L31                        | 19.79 | 17.84 | 20.08 | 19.06 | 19.32 | 19.54 | 0.32  | 0.18  | 0.74  | 1.14  |
| PPUTLS46_001017 | FKBP-type peptidylprolyl isomerase               | 19.78 | 20.87 | 20.68 | 18.01 | 20.56 | 20.71 | -0.59 | 0.24  | 1.46  | 0.78  |
| PPUTLS46_003852 | 4-hydroxy-3-methylbut-2-en-1-yl diphosphate      | 19.78 | 18.53 | 18.28 | 18.28 | 19.53 | 17.51 | -0.43 | -0.74 | 1.78  | 0.44  |
| PPUTLS46_014894 | phosphoribosylaminoimidazole synthetase          | 19.78 | 19.15 | 19.32 | 18.96 | 18.02 | 17.84 | -0.18 | -0.99 | 2.34  | 6.99  |
| PPUTLS46_023928 | 50S ribosomal protein L30                        | 19.77 | 21.89 | 21.3  | 20.59 | 21.41 | 21.65 | 0.16  | 0.35  | 0.92  | 0.81  |
| PPUTLS46_004389 | UspA domain-containing protein                   | 19.76 | 17.46 | 20.66 | 20.24 | 20.53 | 19.62 | 0.81  | 0.37  | 1.67  | 1.24  |
| PPUTLS46_011940 | translation initiation factor IF-1               | 19.76 | 20.78 | 18.9  | 19.78 | 19.51 | 20.45 | -0.31 | -0.96 | 0.73  | 0.14  |
| PPUTLS46_003832 | GTP-binding protein Der                          | 19.76 | 18.3  | 20.14 | 18.78 | 17.22 | 18.43 | 0.69  | -0.23 | 0.37  | 1.22  |
| PPUTLS46_015454 | chorismate mutase                                | 19.75 | 17.7  | 19.42 | 18.74 | 17.35 | 18.71 | 0.4   | 0.01  | 0.66  | 1.01  |
| PPUTLS46_018461 | FAD-dependent pyridine nucleotide-disulfide      | 19.75 | 19.67 | 17.98 | 18.63 | 17.03 | 18.37 | -0.61 | -0.66 | 1.8   | 1.69  |
| PPUTLS46_022086 | methionyl-tRNA ligase                            | 19.74 | 18.29 | 18.65 | 18.74 | 18.07 | 17.94 | -0.03 | -0.23 | 1.09  | 0.67  |
| PPUTLS46_024868 | AsmA family protein                              | 19.73 | 19.16 | 19.82 | 19.53 | 18.4  | 18.76 | 0.12  | -0.25 | 1.8   | 1.78  |
| PPUTLS46_009274 | acetolactate synthase                            | 19.72 | 17.63 | 19.57 | 18.82 | 17.15 | 18.34 | 0.35  | -0.06 | 0.7   | 1.06  |
| PPUTLS46_011955 | cold-shock DNA-binding domain-containing protein | 19.71 | 17.05 | 18.96 | 18.26 | 19.81 | 19.16 | 0.51  | 0.04  | 0.66  | 0.99  |
| PPUTLS46_025383 | uroporphyrin-III C-methyltransferase             | 19.71 | 19.61 | 20.99 | 20.68 | 19.19 | 19.11 | 0.98  | -0.06 | 6.56  | 1.52  |
| PPUTLS46_025393 | porphobilinogen deaminase                        | 19.71 | 19.28 | 17.92 | 19.35 | 18.4  | 19.34 | -0.12 | -0.08 | 0.89  | 0.85  |
| PPUTLS46_016614 | membrane protein insertase                       | 19.7  | 18.89 | 19.31 | 19.33 | 19.06 | 19.2  | 0.01  | 0.05  | 0.95  | 0.95  |
| PPUTLS46_005351 | carboxyl-terminal protease                       | 19.69 | 19.61 | 20.14 | 19.61 | 19    | 18.78 | 0.11  | -0.29 | 1.35  | 2.63  |
| PPUTLS46_012535 | NADPH-dependent FMN reductase                    | 19.68 | 20.1  | 20.26 | 20.02 | 20.38 | 20.92 | 0.1   | 0.29  | 0.85  | 1.38  |
| PPUTLS46_003837 | Pyrrolo-quinoline quinone                        | 19.68 | 19.81 | 19.63 | 19.49 | 20.02 | 20.53 | -0.05 | 0.22  | 0.76  | 1.35  |
| PPUTLS46_013373 | sulfate adenylyltransferase subunit 2            | 19.67 | 19.57 | 18.28 | 18.54 | 18.06 | 18.66 | -0.69 | -0.4  | 2.45  | 1.82  |
| PPUTLS46_014864 | hypothetical protein                             | 19.66 | 18.89 | 22.74 | 21.67 | 21.26 | 20.06 | 2.23  | 0.83  | 4.49  | 2.06  |
| PPUTLS46_021246 | nitroreductase                                   | 19.66 | 16.85 | 18.58 | 17.93 | 20.03 | 18.75 | -0.46 | 0.37  | 0.67  | 0.81  |
| PPUTLS46_024208 | anthranilate synthase component I                | 19.66 | 19.38 | 19.54 | 19.1  | 19.62 | 20.27 | -0.11 | 0.21  | 2.41  | 1.34  |
| PPUTLS46_016519 | glycyl-tRNA ligase subunit alpha                 | 19.66 | 19.8  | 19.35 | 18.75 | 18.93 | 18.81 | -0.38 | -0.25 | 2.06  | 1.82  |
| PPUTLS46_017769 | hypothetical protein                             | 19.63 | 19.28 | 19.09 | 18.89 | 19.88 | 19.71 | -0.34 | 0.56  | 4.49  | 2.82  |
| PPUTLS46_010509 | monosaccharide-transporting ATPase               | 19.63 | 19.47 | 19.9  | 19.86 | 17.7  | 17.25 | 0.06  | -1.44 | 1.12  | 6.91  |
| PPUTLS46_022236 | ABC transporter-like protein                     | 19.62 | 18    | 20.91 | 19.5  | 18.07 | 18.57 | 0.22  | -0.01 | 1.16  | 0.96  |
| PPUTLS46_009714 | methylcitrate synthase                           | 19.61 | 19.51 | 20.24 | 19.81 | 18.89 | 19.33 | 0.32  | -0.17 | 2.52  | 0.52  |
| PPUTLS46_017844 | diaminopimelate decarboxylase                    | 19.6  | 18.11 | 18.18 | 16.97 | 17.94 | 18.28 | -0.28 | -0.02 | 1.32  | 1.06  |
| PPUTLS46_023268 | methylmalonate-semialdehyde dehydrogenase        | 19.59 | 19.93 | 17.22 | 15.28 | 18.63 | 18.01 | -2.22 | -0.65 | 2.67  | 2.21  |
| PPUTLS46_014874 | glucose-methanol-choline oxidoreductase          | 19.58 | 18.56 | 21.82 | 20.74 | 20.75 | 20.52 | 1.45  | 1.33  | 3.01  | 4.02  |
| PPUTLS46_010594 | integration host factor subunit alpha            | 19.58 | 19.14 | 19.76 | 19.2  | 17.68 | 19    | 0.08  | 0.03  | 0.72  | 1     |
| PPUTLS46_012475 | NADH dehydrogenase subunit I                     | 19.57 | 19.57 | 18.46 | 18.71 | 19.07 | 19.19 | -0.45 | -0.09 | 1.93  | 0.61  |
| PPUTLS46_005251 | 3-dehydroquinate synthase                        | 19.57 | 18.41 | 17.22 | 17.55 | 18.26 | 18.49 | -1.01 | -0.01 | 2.47  | 1.07  |
| PPUTLS46_015924 | 3-ketoacyl-(acyl-carrier-protein) reductase      | 19.56 | 19.48 | 19.1  | 18.77 | 19.96 | 19.91 | -0.41 | 0.47  | 3.35  | 3.19  |
| PPUTLS46_005166 | pyrroline-5-carboxylate reductase                | 19.55 | 19.57 | 18.85 | 18.58 | 19.59 | 19.47 | -0.58 | 0.05  | 3.5   | 1.08  |
| PPUTLS46_013403 | tryptophanyl-tRNA ligase                         | 19.55 | 18.72 | 18.05 | 19.01 | 18.72 | 17.72 | 0.02  | 0.03  | 0.99  | 1.01  |
| PPUTLS46_002027 | aromatic amino acid aminotransferase             | 19.54 | 18.91 | 19.45 | 19.31 | 19.16 | 17.42 | 0.05  | -0.14 | 1.1   | 0.85  |
| PPUTLS46_020266 | chemotaxis protein CheW                          | 19.54 | 19.17 | 20.48 | 20    | 17.85 | 20.23 | 0.75  | -0.5  | 7.08  | 0.69  |
| PPUTLS46_017929 | alcohol dehydrogenase                            | 19.53 | 18.81 | 18.55 | 17.85 | 19.67 | 18.66 | -0.58 | 0.31  | 2.71  | 0.56  |
| PPUTLS46_015389 | Uncharacterized protein conserved in bacteria    | 19.53 | 19.04 | 20.71 | 20.38 | 19.21 | 18.24 | 1.16  | -0.07 | 18.19 | 0.82  |
| PPUTLS46_004479 | glycerophosphoryl diester phosphodiesterase      | 19.53 | 16.79 | 20.31 | 18.53 | 19.18 | 18.43 | 0.6   | 0.47  | 0.69  | 0.73  |
| PPUTLS46_009004 | Gluconate 2-dehydrogenase subunit 3              | 19.52 | 17.22 | 19.41 | 19.23 |       |       | 0.18  |       | 1.13  | 0.96  |
| PPUTLS46_001792 | AAA domain                                       | 19.51 | 17.87 | 18.33 | 19.72 | 18.63 | 19.43 | 0.14  | 0.16  | 0.93  | 1.12  |
| PPUTLS46_006396 | DnaJ family curved-DNA-binding protein           | 19.5  | 19.91 | 20.53 | 19.58 | 19.72 | 18.47 | 0.11  | -0.04 | 1.12  | 1.07  |
| PPUTLS46_004259 | Uncharacterized conserved protein                | 19.5  | 19.54 | 20.95 | 19.97 | 17.67 | 17.55 | 0.5   | -1.27 | 1.82  | 5.79  |
| PPUTLS46_023141 | Pfpl family intracellular peptidase              | 19.49 | 17.74 | 21.08 | 20.61 | 19.2  | 19.31 | 1.4   | 0.24  | 2.63  | 1.22  |
| PPUTLS46_015544 | glucose-1-phosphate thymidyltransferase          | 19.49 | 19.27 | 20.24 | 20.49 | 19.13 | 19.41 | 0.51  | 0.16  | 2.01  | 0.56  |
| PPUTLS46_023728 | thioredoxin                                      | 19.49 | 17.94 | 18.96 | 18.72 | 18.56 | 16.56 | 0.15  | -0.51 | 0.85  | 0.63  |
| PPUTLS46_024233 | extracellular solute-binding protein             | 19.49 | 20.01 | 22.05 | 21.21 | 18.11 | 17.51 | 1.29  | -1.02 | 2.87  | 2.6   |
| PPUTLS46_010189 | alcohol dehydrogenase                            | 19.49 | 18.7  |       |       |       |       |       |       | 9.02  | 5.31  |
| PPUTLS46_019901 | cytochrome c oxidase cbb3 type, accessory        | 19.48 | 20.37 | 20.29 | 19.79 | 20.34 | 19.48 | 0.09  | 0.04  | 0.92  | 1.01  |
| PPUTLS46_022751 | ATP phosphoribosyltransferase catalytic subunit  | 19.48 | 19.22 | 19.23 | 18.83 | 19.81 | 19.78 | -0.23 | 0.57  | 3.97  | 6.22  |
| PPUTLS46_025103 | Hsp33-like chaperonin                            | 19.48 | 18.78 | 18.42 | 17.1  | 17.37 | 17.71 | -0.55 | -0.87 | 1.73  | 3.31  |
| PPUTLS46_003947 | preprotein translocase subunit SecD              | 19.46 | 20.1  | 19.66 | 19.71 | 18.95 | 19.47 | -0.31 | -0.42 | 0.5   | 0.44  |
| PPUTLS46_009564 | PpcI-type peptidyl-prolyl cis-trans isomerase    | 19.46 | 19.2  | 20.05 | 20.56 | 18.87 | 18.27 | 0.33  | -0.2  | 1.45  | 1.73  |
| PPUTLS46_017894 | polyphosphate kinase                             | 19.46 | 19.89 | 20.17 | 19.97 | 17.95 | 18.6  | 0.03  | -0.3  | 0.99  | 1.44  |
| PPUTLS46_023408 | alpha-2-macroglobulin domain-containing protein  | 19.45 | 19.34 | 20.58 | 19.38 | 18.05 | 18.64 | 0.11  | -0.22 | 1.12  | 1.48  |
| PPUTLS46_000700 | acyl-CoA dehydrogenase domain-containing protein | 19.45 | 18.34 | 16.98 | 16.48 |       |       | -1.66 |       | 4.63  | 2.71  |
| PPUTLS46_012430 | isocitrate lyase                                 | 19.44 | 19.9  |       |       | 26.33 | 26.22 |       | 5.87  | 5.49  | 11.7  |
| PPUTLS46_021001 | peptidyl-prolyl cis-trans isomerase A            | 19.43 | 19.27 | 20.12 | 19.86 | 20.43 | 19.6  | 0.49  | 0.5   | 4.27  | 1.99  |
| PPUTLS46_007106 | chaperone protein DnaJ                           | 19.43 | 19.36 | 18    | 18.55 | 19.86 | 20.36 | -0.41 | 0.48  | 1.61  | 1.96  |
| PPUTLS46_007509 | isochorismatase hydrolase                        | 19.42 | 20.22 | 21.01 | 19.45 | 19.45 | 20.02 | 0.08  | 0.65  | 1.04  | 0.31  |
| PPUTLS46_021021 | 3-oxoacyl-(acyl carrier protein) synthase III    | 19.41 | 18.96 | 19.7  | 18.27 | 20.52 | 19.79 | -0.28 | 0.8   | 0.64  | 2.96  |
| PPUTLS46_000345 | glutamyl-tRNA ligase                             | 19.41 | 19.38 | 19.35 | 19.86 | 17.94 | 20.17 | 0.45  | -0.64 | 0.41  | 0.58  |
| PPUTLS46_002847 | cysteinyl-tRNA ligase                            | 19.4  | 18.59 | 19.17 | 18.84 | 19.47 | 18.68 | -0.03 | 0.22  | 0.76  | 0.63  |
| PPUTLS46_017879 | isoprenoid biosynthesis protein                  | 19.4  | 18.02 | 20.28 | 19.19 | 19.45 | 19.2  | 0.15  | 0.28  | 1.13  | 1.37  |
| PPUTLS46_004414 | DNA topoisomerase I subunit omega                | 19.4  | 19.66 | 19.86 | 19.83 | 18.96 | 18.56 | 0.16  | -0.18 | 0.73  | 1.47  |
| PPUTLS46_002887 | delta-aminolevulinic acid dehydratase            | 19.4  | 18.78 | 18.64 | 19.59 | 18.82 | 18.1  | -0.27 | 0.01  | 0.71  | 0.95  |
| PPUTLS46_004896 | ribose-5-phosphate isomerase A                   | 19.37 | 18.18 | 18.72 | 18.49 | 18.61 | 17.88 | 0.01  | -0.37 | 0.96  | 0.4   |

|                 |                                                  |       |       |       |       |       |       |       |       |       |       |
|-----------------|--------------------------------------------------|-------|-------|-------|-------|-------|-------|-------|-------|-------|-------|
| PPUTLS46_014884 | Protein of unknown function (DUF3108)            | 19.37 | 19.05 | 19.42 | 19.3  | 18.5  | 19.53 | 0.07  | 0.31  | 0.78  | 0.65  |
| PPUTLS46_007336 | Uncharacterized enzyme of heme biosynthesis      | 19.36 | 18.28 | 18.19 | 18.33 | 19.29 | 18.95 | -0.21 | 0.11  | 1.41  | 1.17  |
| PPUTLS46_024108 | tyrosyl-tRNA ligase                              | 19.36 | 18.31 | 19.59 | 19.19 | 18.74 | 17.9  | 0.2   | -0.38 | 1.41  | 0.37  |
| PPUTLS46_023918 | preprotein translocase subunit SecY              | 19.36 | 17.32 | 16.26 | 16.65 | 18.07 | 17.21 | -1.01 | -0.57 | 1.9   | 0.49  |
| PPUTLS46_015374 | polyphosphate:AMP phosphotransferase             | 19.35 | 19.42 | 20.6  | 20.42 | 18.68 | 18.56 | 0.81  | -0.21 | 3.61  | 1.82  |
| PPUTLS46_008564 | CzcA family heavy metal efflux protein           | 19.35 | 18.77 | 17.73 | 18.12 | 16.08 | 17.19 | -0.6  | -1.23 | 2.08  | 2.49  |
| PPUTLS46_019306 | YVTN beta-propeller repeat-containing protein    | 19.35 | 19.03 | 19.98 | 19.88 |       |       | 0.54  |       | 3.7   | 45.75 |
| PPUTLS46_022876 | peptidase U62, modulator of DNA gyrase           | 19.34 | 17.73 | 18.75 | 18.05 | 18.09 | 18.54 | -0.33 | 0.09  | 0.55  | 0.93  |
| PPUTLS46_019256 | Pyrrolo-quinoline quinone                        | 19.34 | 17.7  | 19.31 | 19.18 |       |       | 0.21  |       | 1.22  | 1.33  |
| PPUTLS46_016199 | Protein of unknown function (DUF2782)            | 19.33 | 19.23 | 19.87 | 19.84 | 19.53 | 20.25 | 0.27  | 0.29  | 1.82  | 1.43  |
| PPUTLS46_023041 | imelysin. Metallo peptidase. MEROPS family M75   | 19.33 | 18.09 | 19.66 | 18.58 | 18.97 | 18.36 | 0.45  | 0.42  | 0.47  | 0.4   |
| PPUTLS46_005431 | glycogen phosphorylase                           | 19.33 | 19.56 | 22.62 | 22.09 | 18.82 | 18.56 | 2.47  | -0.16 | 7.1   | 1.48  |
| PPUTLS46_005381 | preprotein translocase subunit SecB              | 19.33 | 18.99 | 19.55 | 19.31 | 17.95 | 18.61 | 0.19  | -0.1  | 2.97  | 1.25  |
| PPUTLS46_022806 | lipopolysaccharide transport periplasmic protein | 19.32 | 19.69 | 19.57 | 19.17 | 20.32 | 20.08 | 0.02  | 0.5   | 0.97  | 1.97  |
| PPUTLS46_002267 | Short-chain dehydrogenase/reductase SDR          | 19.32 | 19.32 | 17.82 | 16.17 | 18.72 | 17.9  | -1.32 | -0.33 | 2.26  | 1.7   |
| PPUTLS46_005436 | fructose-1,6-bisphosphatase                      | 19.32 | 19.09 | 19.15 | 19.22 | 17.78 | 18.1  | -0.18 | -0.59 | 0.37  | 2.92  |
| PPUTLS46_009724 | putative AcnD-accessory protein PrpF             | 19.3  | 18.66 | 16.59 | 17.08 | 18.96 | 19.12 | -1.49 | 0.15  | 3.27  | 1.45  |
| PPUTLS46_022596 | hypothetical protein                             | 19.29 | 19.75 | 20.76 | 19.79 | 19.82 | 20.14 | 0.34  | 0.09  | 1.43  | 1.1   |
| PPUTLS46_010429 | short chain dehydrogenase                        | 19.29 | 17.47 | 21.03 | 19.58 | 19.56 | 19.28 | 0.64  | 0.44  | 1.48  | 1.42  |
| PPUTLS46_020126 | sulfate ABC transporter, periplasmic             | 19.29 | 19.05 | 19.16 | 19.07 | 19.49 | 17.7  | -0.08 | -0.16 | 0.43  | 0.82  |
| PPUTLS46_009869 | peptidase M14, carboxypeptidase A                | 19.28 | 18.48 | 19.47 | 19.65 | 17.87 | 16.32 | 0.32  | -0.5  | 1.6   | 1.53  |
| PPUTLS46_007774 | Protein of unknown function (DUF3313)            | 19.27 | 15.75 | 20.67 | 20.19 | 19.72 | 18.9  | 1.25  | 0.16  | 1.64  | 1.06  |
| PPUTLS46_004474 | soluble pyridine nucleotide transhydrogenase     | 19.27 | 19.99 | 19.61 | 19.18 | 17.75 | 18.83 | 0.01  | -0.05 | 0.96  | 0.93  |
| PPUTLS46_005256 | sporulation domain-containing protein            | 19.26 | 19.32 | 18.45 | 18.68 | 19.35 | 19.22 | -0.19 | 0.06  | 1.42  | 1.12  |
| PPUTLS46_014859 | Uncharacterized protein conserved in bacteria    | 19.26 | 18.94 | 18.49 | 17.93 | 18.45 | 18.07 | -0.69 | -0.38 | 4.85  | 3.44  |
| PPUTLS46_005976 | bifunctional heptose 7-phosphate kinase/heptose  | 19.25 | 17.11 | 18.39 | 18.8  | 18.6  | 18.13 | 0.06  | 0.43  | 1.03  | 0.66  |
| PPUTLS46_004921 | phosphoenolpyruvate-protein phosphotransferase   | 19.24 | 18.69 | 20.28 | 19.84 | 18.41 | 18.42 | 0.94  | -0.12 | 7.68  | 1.99  |
| PPUTLS46_016539 | general substrate transporter                    | 19.24 | 19.62 | 17.48 | 13.86 |       |       | -1.48 |       | 1.57  | 3.67  |
| PPUTLS46_021376 | hypothetical protein                             | 19.22 | 17.38 | 15.82 | 15.55 | 18.46 | 17.61 | -1.77 | -0.71 | 3.03  | 0.31  |
| PPUTLS46_013508 | UDP-N-acetylmuramoyl-tripeptide--D-alanyl-D-     | 19.21 | 18    | 19.75 | 18.72 | 18.74 | 18.6  | 0.2   | 0.11  | 0.78  | 0.87  |
| PPUTLS46_015574 | beta-ketoacyl synthase-like protein              | 19.21 | 19.49 |       |       |       |       |       |       | 6.21  | 4.05  |
| PPUTLS46_015509 | UDP-N-acetylglucosamine 2-epimerase              | 19.2  | 18.95 | 17.75 | 18.66 | 19.27 | 18.95 | -0.02 | 0.19  | 1.05  | 2.11  |
| PPUTLS46_007351 | acetolactate synthase 3 regulatory subunit       | 19.2  | 18.62 | 18.3  | 17.85 | 19.22 | 17.27 | -0.66 | -0.32 | 5.42  | 0.71  |
| PPUTLS46_005496 | proline iminopeptidase                           | 19.2  | 18.62 | 18.76 | 18.92 | 18.94 | 18.73 | -0.03 | 0.06  | 0.84  | 1.21  |
| PPUTLS46_009774 | peptidase                                        | 19.18 | 19.85 | 18.2  | 16.75 | 19.29 | 19.64 | -1.14 | 0.46  | 2.07  | 0.44  |
| PPUTLS46_012833 | 3-hydroxyisobutyrate dehydrogenase               | 19.18 | 17.61 | 20.97 | 20.54 | 18.31 | 18.46 | 1.61  | 0.13  | 3.19  | 0.88  |
| PPUTLS46_004294 | aconitate hydratase                              | 19.18 | 19.16 | 21.47 | 20.7  | 17.96 | 19.29 | 1.5   | -0.41 | 4.59  | 0.56  |
| PPUTLS46_020181 | PhzF family phenazine biosynthesis protein       | 19.17 | 18.17 | 15.21 | 15.91 | 20.88 | 20.32 | -2.24 | 1.56  | 3.53  | 4.08  |
| PPUTLS46_014174 | signal recognition particle protein              | 19.17 | 16.7  | 18.24 | 16.74 | 18.46 | 15.81 | -0.91 | -1.58 | 0.4   | 0.26  |
| PPUTLS46_017029 | Uncharacterized protein conserved in bacteria    | 19.17 | 16.64 | 20.14 | 18.84 | 17.27 | 15.85 | 0.11  | -0.54 | 1.06  | 0.65  |
| PPUTLS46_021161 | AAA family ATPase                                | 19.16 | 18.94 | 17.3  | 17.62 | 19.6  | 19.64 | -1.04 | 0.64  | 3.06  | 4.88  |
| PPUTLS46_025629 | hypothetical protein                             | 19.16 | 19.45 | 17.35 | 18.08 | 19.56 | 20.1  | -0.62 | 0.14  | 1.7   | 1.17  |
| PPUTLS46_005911 | trifunctional transcriptional regulator/proline  | 19.16 | 19.76 | 20.43 | 19.79 | 18.09 | 18.32 | 0.27  | -0.28 | 1.37  | 1.45  |
| PPUTLS46_023698 | bifunctional 3,4-dihydroxy-2-butanone            | 19.15 | 18.72 | 19.15 | 18.74 | 19.28 | 19.41 | -0.01 | 0.48  | 0.45  | 3.39  |
| PPUTLS46_020201 | cytochrome c-type biogenesis protein             | 19.15 | 18.95 | 18.97 | 18.83 | 17.85 | 17.32 | 0.01  | -0.85 | 0.9   | 4.06  |
| PPUTLS46_009709 | 2-methylisocitrate lyase                         | 19.15 | 15.71 | 18.43 | 18.45 | 17.6  | 18.06 | 0.04  | 0.27  | 1.01  | 0.88  |
| PPUTLS46_007669 | polysaccharide export protein                    | 19.14 | 18.62 | 21.23 | 21.22 | 20.89 | 19.61 | 2.01  | 0.84  | 8.36  | 2.05  |
| PPUTLS46_009824 | response regulator receiver protein              | 19.14 | 16.61 | 16.87 | 16.85 | 17.41 | 17.49 | -0.22 | -0.3  | 1.19  | 0.77  |
| PPUTLS46_015519 | family 2 glycosyl transferase                    | 19.13 | 18.42 | 19.07 | 18.83 | 19.04 | 19.52 | 0.04  | 0.4   | 1.07  | 1.79  |
| PPUTLS46_005621 | poly(R)-hydroxyalkanoic acid synthase, class II  | 19.12 | 18.9  | 21.4  | 21.05 | 20.92 | 20.67 | 2.06  | 1.8   | 21.47 | 15.18 |
| PPUTLS46_015554 | dTDP-D-glucose 4,6-dehydratase                   | 19.1  | 16.33 | 20.08 | 19.03 | 19.33 | 18.28 | 0.4   | 0.28  | 1.23  | 0.85  |
| PPUTLS46_003927 | inositol-phosphate phosphatase                   | 19.1  | 19    | 19.85 | 18.5  | 17.72 | 16.63 | 0.2   | -0.94 | 0.8   | 2.48  |
| PPUTLS46_016624 | tRNA uridine 5-carboxymethylaminomethyl          | 19.1  | 18.33 | 15.82 | 17.37 | 17.72 | 17.39 | -0.83 | -0.52 | 1.58  | 2.89  |
| PPUTLS46_019266 | Sulfur oxidation protein SoxY/Sulphur oxidation  | 19.1  | 18.21 | 18.85 | 19.36 |       |       | 0.06  |       | 1.04  | 3.18  |
| PPUTLS46_026246 | beta-ketothiolase                                | 19.08 | 17.58 | 19.19 | 18.21 | 20.98 | 20.52 | 0.49  | 1.78  | 0.46  | 3.27  |
| PPUTLS46_003797 | ornithine decarboxylase                          | 19.08 | 18.12 | 18.97 | 18.57 | 17.91 | 17.94 | 0.11  | -0.08 | 0.75  | 1.26  |
| PPUTLS46_001167 | uracil phosphoribosyltransferase                 | 19.08 | 18.77 | 17.76 | 16.42 | 16.08 | 18.47 | -1.04 | 0.01  | 2.34  | 1.01  |
| PPUTLS46_021691 | dienelactone hydrolase                           | 19.06 | 19.15 | 21.03 | 20.88 | 18.87 | 18.94 | 1.49  | 0.22  | 5.5   | 0.42  |
| PPUTLS46_003847 | histidyl-tRNA ligase                             | 19.05 | 18.67 | 18.78 | 18.06 | 18.92 | 18.12 | -0.16 | -0.08 | 1.59  | 0.76  |
| PPUTLS46_020291 | chemotaxis-specific protein-glutamate            | 19.05 | 18.15 | 19.24 | 18.06 | 18.42 | 18.93 | 0.6   | 0.09  | 0.23  | 1.12  |
| PPUTLS46_018686 | dihydrodipicolinate reductase                    | 19.05 | 18.45 | 19.14 | 18.69 | 17.81 | 19.62 | 0.05  | 0.32  | 0.85  | 0.78  |
| PPUTLS46_006286 | NAD synthetase                                   | 19.03 | 19.74 | 20.66 | 20.32 | 21.25 | 20.01 | 0.55  | 0.73  | 1.79  | 1.69  |
| PPUTLS46_021451 | Uncharacterized protein conserved in bacteria    | 19.03 | 19.07 | 18.87 | 18.79 | 18.97 | 18.53 | -0.03 | 0.01  | 0.81  | 1.05  |
| PPUTLS46_022866 | pmbA protein                                     | 19.03 | 19.05 | 18.68 | 19.07 | 17.24 | 19.21 | -0.34 | -0.48 | 0.39  | 0.65  |
| PPUTLS46_012730 | dienelactone hydrolase                           | 19.02 | 19.29 | 19.13 | 18.89 | 18.55 | 19.1  | -0.03 | -0.52 | 0.83  | 0.11  |
| PPUTLS46_005061 | rhodanese domain-containing protein              | 19.02 | 19.22 | 19.26 | 19.57 | 18.14 | 19.22 | 0.39  | -0.53 | 0.42  | 0.36  |
| PPUTLS46_009194 | nickel transport system substrate-binding        | 19.02 | 17.06 | 20.11 | 19.41 |       |       | 0.76  |       | 1.72  | 0.87  |
| PPUTLS46_012100 | 6-phosphogluconate dehydrogenase-like protein    | 19.01 | 18.72 | 20.47 | 20.38 | 18.72 | 18.82 | 1.32  | 0.04  | 7.54  | 0.96  |
| PPUTLS46_013533 | UDP-N-acetylmuramate--L-alanine ligase           | 19.01 | 14.94 | 17.79 | 18.37 | 18.31 | 17.51 | 0.11  | 0.68  | 1.04  | 0.73  |
| PPUTLS46_007236 | glucose-6-phosphate isomerase                    | 19.01 | 17.56 | 19.63 | 19.39 | 17.08 | 17.68 | 0.66  | -0.12 | 1.95  | 1.18  |
| PPUTLS46_013313 | PhoH family protein                              | 19    | 19.43 | 17.89 | 17.79 | 19.72 | 20.6  | -0.83 | 0.3   | 2.65  | 1.31  |
| PPUTLS46_021441 | peptidase M48, Ste24p                            | 19    | 18.85 | 18.25 | 18.5  | 18.68 | 17.94 | -0.07 | -0.08 | 1.22  | 1.25  |
| PPUTLS46_020431 | sigma54 specific transcriptional regulator, Fis  | 18.99 | 17.98 | 20.2  | 19.88 | 16.29 | 17.13 | 1.16  | -0.77 | 3.96  | 2.04  |
| PPUTLS46_025308 | CBS domain-containing protein                    | 18.98 | 17.19 | 20.44 | 19.3  | 19.45 | 18.41 | 0.68  | 0.08  | 1.6   | 0.95  |
| PPUTLS46_008769 | putative transcriptional regulator, MvaT P16     | 18.98 | 18.78 | 19.34 | 19.18 | 18.95 | 17.42 | 0.21  | -0.05 | 2.01  | 0.91  |
| PPUTLS46_007261 | Putative two component, sigma54 specific,        | 18.98 | 18.46 | 18.83 | 18.08 | 17.99 | 14.91 | 0     | -1.09 | 0.92  | 1.82  |
| PPUTLS46_011460 | ssDNA-binding protein                            | 18.95 | 17.14 | 17.55 | 17.32 | 19.44 | 19.02 | -0.07 | 0.51  | 1.12  | 1.5   |
| PPUTLS46_003652 | Rhs element Vgr protein                          | 18.95 | 19.33 | 16.95 | 17.27 | 19.31 | 19.58 | -1.28 | 0.05  | 2.91  | 0.97  |
| PPUTLS46_021876 | ATP-dependent helicase HepA                      | 18.95 | 19.7  | 18.69 | 18.71 | 17.1  | 18.99 | 0.03  | -0.48 | 1     | 0.67  |
| PPUTLS46_013503 | UDP-N-acetylmuramoylalanyl-D-glutamate--2,       | 18.94 | 18.52 | 20.36 | 20.31 | 20.74 | 19.43 | 1.33  | 0.83  | 6.81  | 2.02  |
| PPUTLS46_010584 | phenylalanyl-tRNA ligase subunit alpha           | 18.94 | 17.81 | 19.05 | 18.99 | 17.47 | 18.71 | 0.29  | -0.05 | 1.52  | 0.93  |
| PPUTLS46_020556 | type IV pilus assembly PilZ                      | 18.93 | 17.53 | 18.04 | 17.91 | 18.95 | 18.16 | 0.02  | 0.27  | 1.02  | 0.7   |
| PPUTLS46_020296 | CheA signal transduction histidine kinase        | 18.92 | 19.44 | 18.45 | 18.37 | 19.81 | 19.33 | -0.24 | 0.24  | 1.46  | 1.34  |
| PPUTLS46_026306 | lactoylglutathione lyase                         | 18.92 | 18.14 | 18.86 | 18.37 | 18.09 | 17.57 | 0.2   | -0.01 | 0.4   | 1.11  |
| PPUTLS46_025971 | decarboxylase family protein                     | 18.91 | 17.97 | 18.57 | 18.91 | 16.5  | 18.37 | 0.03  | 0     | 1.01  | 0.98  |

|                 |                                                  |       |       |       |       |       |       |       |       |       |  |       |       |
|-----------------|--------------------------------------------------|-------|-------|-------|-------|-------|-------|-------|-------|-------|--|-------|-------|
| PPUTLS46_012878 | gamma-glutamyltransferase                        | 18.9  | 17.64 | 17.51 | 18.96 |       |       |       |       | -0.19 |  | 0.85  | 1.4   |
| PPUTLS46_024408 | pyrroloquinoline quinone biosynthesis protein    | 18.9  | 19.13 |       |       |       |       |       |       |       |  | 5.88  | 3.59  |
| PPUTLS46_020546 | anti-sigma-28 factor, FlgM                       | 18.88 | 18.37 | 17.59 | 17.53 | 20.74 | 18.16 |       | -0.81 | 0.2   |  | 4.68  | 0.9   |
| PPUTLS46_025614 | surface adhesion protein                         | 18.88 | 20.26 | 18.25 | 18.7  | 19.06 | 18.17 |       | -0.01 | -0.08 |  | 0.97  | 1.09  |
| PPUTLS46_022141 | dihydroorotase                                   | 18.88 | 19.27 | 19.06 | 19.05 | 18.9  | 17.15 |       | -0.26 | -0.14 |  | 0.45  | 1.15  |
| PPUTLS46_022021 | synthetase                                       | 18.88 | 18.17 |       |       |       | 18.33 | 19.24 |       | 0.1   |  | 8.33  | 1.09  |
| PPUTLS46_015654 | Glycosyltransferase                              | 18.88 | 19.43 |       |       |       | 18.17 | 17.8  |       | -0.38 |  | 4.1   | 1.65  |
| PPUTLS46_011140 | cytochrome c-type protein                        | 18.88 | 16.95 | 17.27 | 17.87 | 18.08 | 18.79 |       | -0.03 | 0.2   |  | 1.05  | 1.15  |
| PPUTLS46_001442 | GTPase CgtA                                      | 18.88 | 18.24 | 16.69 | 17.05 | 17.7  | 17.02 |       | -1.14 | -0.47 |  | 3.06  | 2.25  |
| PPUTLS46_011920 | lipoprotein chaperone                            | 18.88 | 18.42 | 17.86 | 18.73 | 17.2  | 18.88 |       | -0.21 | -0.26 |  | 0.75  | 0.76  |
| PPUTLS46_014529 | methionine aminopeptidase                        | 18.87 | 17.53 | 19.32 | 19.62 | 17.03 | 17.81 |       | 0.68  | -0.07 |  | 1.84  | 1.11  |
| PPUTLS46_005641 | dihydroorotase                                   | 18.86 | 18.89 | 19.22 | 18.69 | 18.69 | 17.82 |       | 0.05  | -0.07 |  | 1.09  | 1.18  |
| PPUTLS46_025133 | osmolarity response regulator                    | 18.82 | 18.21 | 19.49 | 19.44 | 18.06 | 17.77 |       | 0.06  | -0.38 |  | 0.93  | 1.8   |
| PPUTLS46_009854 | type 1 pilI usher pathway chaperone CsuC         | 18.81 | 19.06 | 19.84 | 19.72 | 18.99 | 19.3  |       | 0.44  | 0.09  |  | 1.99  | 0.88  |
| PPUTLS46_012130 | Protein of unknown function (DUF2934)            | 18.81 | 18.96 | 19.54 | 20.54 | 17.91 | 17.41 |       | -0.08 | -0.56 |  | 1.05  | 2.43  |
| PPUTLS46_013778 | RND family efflux transporter MFP subunit        | 18.8  | 20.06 | 18.85 | 19.41 | 19.7  | 19.41 |       | 0.7   | 0.19  |  | 0.4   | 0.86  |
| PPUTLS46_009899 | Uncharacterized protein conserved in bacteria    | 18.79 | 17.58 | 17.47 | 16.94 | 16.61 | 16.82 |       | -0.47 | -0.61 |  | 1.94  | 2.07  |
| PPUTLS46_017724 | aerotaxis receptor Aer                           | 18.78 | 17.5  | 18.95 | 18.41 | 18.66 | 17.86 |       | 0.05  | 0.41  |  | 1.03  | 0.49  |
| PPUTLS46_005086 | signal recognition particle-docking protein FtsY | 18.77 | 17.79 | 15.83 | 18.22 | 17    | 17.84 |       | -0.1  | -0.11 |  | 0.94  | 1.19  |
| PPUTLS46_007221 | Uncharacterized protein involved in outer        | 18.76 | 17.87 | 19.4  | 18.97 | 18.48 | 16.77 |       | 0.54  | -0.41 |  | 2.61  | 0.6   |
| PPUTLS46_000225 | signal peptide peptidase SppA, 36K type          | 18.76 | 16.62 | 18.07 | 18.15 | 18.39 | 18.48 |       | 0.05  | 0.18  |  | 0.98  | 1.13  |
| PPUTLS46_006226 | 23S rRNA (guanosine-2'-O-) - methyltransferase   | 18.75 | 18.1  | 18.23 | 18.7  | 18.74 | 18.77 |       | 0.18  | 0.4   |  | 0.78  | 2.7   |
| PPUTLS46_000055 | Predicted ATPase (AAA+ superfamily)              | 18.75 | 18.63 | 18.14 | 17.41 | 16.4  | 17.37 |       | -0.58 | -0.7  |  | 2.75  | 1.96  |
| PPUTLS46_014334 | peptide chain release factor 2                   | 18.74 | 18.08 | 18.35 | 16.64 | 19.35 | 16.99 |       | -0.01 | 0.6   |  | 0.96  | 0.61  |
| PPUTLS46_005506 | glucan biosynthesis protein G                    | 18.74 | 19.06 | 19.46 | 19.18 | 18.44 | 18.55 |       | 0.11  | -0.19 |  | 1.19  | 0.55  |
| PPUTLS46_005291 | cobyrinic acid a,c-diamide synthase              | 18.74 | 17.04 | 19.53 | 18.83 | 17.92 | 18.07 |       | 0.47  | 0.11  |  | 1.51  | 0.91  |
| PPUTLS46_007136 | putative RNA-binding protein, YhbY family        | 18.73 | 17.24 | 19.12 | 18.59 | 18.59 | 16.41 |       | 0.26  | -1.01 |  | 1.32  | 0.32  |
| PPUTLS46_010559 | hypothetical protein                             | 18.72 | 17.08 | 17.57 | 18.94 | 20.46 | 18.57 |       | 0.12  | 0.35  |  | 0.94  | 1.22  |
| PPUTLS46_022071 | deoxycytidine triphosphate deaminase             | 18.72 | 18.95 | 17.07 | 17.89 | 19.83 | 19.62 |       | -0.35 | 0.75  |  | 1.4   | 2.83  |
| PPUTLS46_005036 | phosphopantetheine adenyltransferase             | 18.72 | 17.13 | 19.47 | 19.49 | 19    | 14.65 |       | 0.9   | -1.27 |  | 2.1   | 0.56  |
| PPUTLS46_022656 | glycine cleavage system T protein                | 18.72 | 17.99 | 19.12 | 19.15 | 17.63 | 18.69 |       | 0.47  | 0.16  |  | 2.25  | 0.85  |
| PPUTLS46_017174 | bifunctional                                     | 18.72 | 18.21 | 15.02 | 15.98 | 16.3  | 16.86 |       | -1.95 | -1.06 |  | 2.94  | 3.29  |
| PPUTLS46_023718 | Uncharacterized protein conserved in bacteria    | 18.71 | 17.58 | 18.86 | 18.3  | 19.16 | 17.85 |       | 0.06  | 0.36  |  | 0.93  | 0.65  |
| PPUTLS46_001142 | malate:quinone oxidoreductase                    | 18.71 | 16.28 | 17.82 | 18.3  | 17.63 | 19.06 |       | 0.08  | 0.31  |  | 1.04  | 1.16  |
| PPUTLS46_024398 | pyrroloquinoline quinone biosynthesis protein    | 18.71 | 17.92 | 18.05 | 18.88 |       |       |       | 0.23  |       |  | 0.79  | 2.76  |
| PPUTLS46_019896 | cytochrome c oxidase, cbb3-type subunit III      | 18.7  | 18.88 | 19.82 | 19.73 | 16.59 | 16.82 |       | 0.58  | -1.24 |  | 2.42  | 3.92  |
| PPUTLS46_019861 | cbb3-type cytochrome c oxidase subunit I         | 18.68 | 18.99 |       |       | 19.2  | 18.62 |       | 0.11  | 4.74  |  | 1.16  |       |
| PPUTLS46_020096 | 2-hydroxy-3-oxopropionate reductase              | 18.68 | 18.19 |       |       | 18.34 | 17.25 |       |       | -0.06 |  | 24.31 | 0.85  |
| PPUTLS46_025368 | anti-RNA polymerase sigma 70 factor              | 18.67 | 19.38 | 19.53 | 18.76 | 19.04 | 19    |       | 0.05  | 0.22  |  | 1.02  | 0.74  |
| PPUTLS46_009679 | phosphoadenosine phosphosulfate reductase        | 18.67 | 16.76 | 18.31 | 18.76 | 17.36 | 16.25 |       | 0.25  | -0.51 |  | 1.19  | 0.55  |
| PPUTLS46_023438 | Uncharacterized protein conserved in bacteria    | 18.65 | 19.42 | 20.05 | 19.94 | 17.95 | 18.18 |       | 0.33  | 0.01  |  | 1.43  | 0.98  |
| PPUTLS46_021411 | lipoprotein                                      | 18.64 | 20.1  | 19.57 | 19.08 | 19.97 | 19.77 |       | -0.1  | 0.1   |  | 0.88  | 0.94  |
| PPUTLS46_005671 | glutathione synthetase                           | 18.64 | 17.55 | 17.34 | 17.8  | 18.97 | 17.93 |       | -0.11 | 0.22  |  | 1.19  | 0.75  |
| PPUTLS46_001427 | hypothetical protein                             | 18.64 | 17.79 |       |       | 15.3  | 17.27 |       |       | -0.47 |  | 4.87  | 1.34  |
| PPUTLS46_023338 | methyl-accepting chemotaxis sensory transducer   | 18.63 | 18.76 | 18.53 | 18.43 | 15.21 | 12.01 |       | -0.05 | -2.73 |  | 0.77  | 2.34  |
| PPUTLS46_022916 | asparaginyl/glutamyl-tRNA amidotransferase       | 18.62 | 19.5  | 17.82 | 17.18 | 19.47 | 18.77 |       | -0.88 | 0.04  |  | 2.13  | 1.01  |
| PPUTLS46_000877 | surface adhesion protein                         | 18.62 | 19.3  | 20.35 | 20.25 | 19.43 | 20.19 |       | 0.71  | 0.15  |  | 2.02  | 1.13  |
| PPUTLS46_006091 | HAMP domain-containing protein                   | 18.61 | 17.22 | 17.64 | 16.64 | 18.8  | 18.11 |       | 0.01  | 0.04  |  | 0.98  | 1.02  |
| PPUTLS46_020316 | protein FleN                                     | 18.61 | 16.96 | 19.76 | 19.43 | 17.62 | 17.11 |       | 1.08  | -0.42 |  | 2.35  | 0.49  |
| PPUTLS46_009159 | H-NS family protein MvaT                         | 18.61 | 17.4  | 19.32 | 18.74 | 17.44 | 17.05 |       | 0.49  | -0.02 |  | 1.84  | 0.91  |
| PPUTLS46_004047 | aminotransferase                                 | 18.61 | 17.28 | 17.01 | 16.75 | 16.99 | 17.36 |       | -0.56 | -0.07 |  | 2.03  | 1.14  |
| PPUTLS46_005756 | 5,10-methylenetetrahydrofolate reductase         | 18.61 | 18.32 | 18.64 | 19.11 | 16.97 | 16.29 |       | 0.18  | -1.12 |  | 0.78  | 4.17  |
| PPUTLS46_024203 | outer membrane autotransporter barrel domain     | 18.61 | 17.72 | 14.13 | 17.12 |       |       |       | -0.46 |       |  | 1.19  | 1.91  |
| PPUTLS46_016794 | cyclopropane-fatty-acyl-phospholipid synthase    | 18.6  | 18.29 | 18.92 | 18.2  | 16.83 | 14.34 |       | 0.09  | -1.1  |  | 0.81  | 1.72  |
| PPUTLS46_000725 | Protein of unknown function (DUF3144)            | 18.59 | 19.36 | 19.3  | 17.91 | 19.77 | 18.97 |       | -0.02 | 0.2   |  | 1.05  | 1.2   |
| PPUTLS46_014299 | methyl-accepting chemotaxis sensory transducer   | 18.59 | 17.67 | 20.16 | 19.32 | 18.39 | 17.14 |       | 1.04  | -0.5  |  | 2.96  | 0.37  |
| PPUTLS46_005681 | response regulator receiver protein              | 18.57 | 19.23 | 18.13 | 18.85 | 18.6  | 19.27 |       | -0.58 | 0.59  |  | 0.41  | 0.35  |
| PPUTLS46_023298 | adenosine deaminase                              | 18.56 | 15.12 | 19.17 | 18.24 | 19.15 | 17.72 |       | 0.23  | 0.3   |  | 1.1   | 0.88  |
| PPUTLS46_000715 | acetyl-CoA acetyltransferase                     | 18.56 | 18.48 | 16.05 | 16.26 |       |       |       | -1.84 |       |  | 5.03  | 4.9   |
| PPUTLS46_017064 | signal transduction protein                      | 18.55 | 17.29 | 17.2  | 17.23 | 17.36 | 14.86 |       | -0.3  | -0.03 |  | 1.55  | 0.97  |
| PPUTLS46_021981 | OmpA/MotB domain-containing protein              | 18.54 | 18.46 | 20.48 | 19.92 | 18.88 | 20.02 |       | 1.43  | 0.37  |  | 6.36  | 1.39  |
| PPUTLS46_025398 | LytTR family two component transcriptional       | 18.54 | 17.84 | 20.16 | 20.3  | 18.11 | 17.49 |       | 1.59  | -0.21 |  | 4.69  | 0.39  |
| PPUTLS46_008559 | RND family efflux transporter MFP subunit        | 18.54 | 19.37 | 16.88 | 16.62 | 15.28 | 15.66 |       | -1.47 | -2.14 |  | 3.03  | 3.53  |
| PPUTLS46_021046 | long-chain-fatty-acid--CoA ligase                | 18.53 | 18.49 | 17.71 | 16.82 | 19.16 | 18.32 |       | -0.8  | 0.18  |  | 2.71  | 1.3   |
| PPUTLS46_014849 | (p)ppGpp synthetase I SpoT/RelA                  | 18.53 | 18.09 | 20.33 | 20.09 | 17.95 | 15.99 |       | 1.77  | -0.08 |  | 22.13 | 1.09  |
| PPUTLS46_013608 | MscS mechanosensitive ion channel                | 18.53 | 18.51 | 18.14 | 17.59 | 16.89 | 17.34 |       | -0.42 | -0.58 |  | 2.59  | 2.36  |
| PPUTLS46_004012 | selenophosphate synthetase                       | 18.52 | 17.22 | 16.78 | 16.63 | 18.36 | 17.89 |       | -0.67 | 0.13  |  | 2.22  | 0.85  |
| PPUTLS46_025684 | toxin secretion ATP-binding protein              | 18.51 | 18.79 | 18.88 | 19.27 | 18.33 | 18.15 |       | 0.34  | -0.02 |  | 0.55  | 0.88  |
| PPUTLS46_022081 | ATPases involved in chromosome partitioning      | 18.51 | 17.58 | 17.73 | 14.91 | 17.35 | 18.27 |       | -0.03 | 0.09  |  | 0.97  | 0.93  |
| PPUTLS46_013418 | aldo/keto reductase                              | 18.5  | 17.29 | 19.61 | 19.39 | 18.21 | 17.87 |       | 1.1   | 0.13  |  | 3.1   | 0.83  |
| PPUTLS46_020451 | flagellar protein FlaG protein                   | 18.49 | 18.65 | 17.05 | 16.15 | 17.56 | 16.74 |       | -1.42 | -0.64 |  | 3.6   | 2.19  |
| PPUTLS46_017899 | Exopolyphosphatase                               | 18.49 | 17.61 | 18.99 | 19.03 | 17.38 | 15.12 |       | 0.59  | -0.16 |  | 2.33  | 1.13  |
| PPUTLS46_005326 | betaine aldehyde dehydrogenase                   | 18.49 | 17.9  | 17.67 | 16.7  | 17.19 | 17    |       | -0.48 | -0.61 |  | 1.98  | 5.41  |
| PPUTLS46_019881 | cbb3-type cytochrome c oxidase subunit I         | 18.48 | 18.33 | 19.33 | 19.03 | 18.63 | 18.07 |       | 0.62  | 0.08  |  | 5.21  | 1.16  |
| PPUTLS46_001437 | gamma-glutamyl kinase                            | 18.47 | 17.95 | 15.86 | 17.82 | 19.3  | 18.43 |       | 0.02  | 0.42  |  | 1     | 1.79  |
| PPUTLS46_004067 | cytochrome o ubiquinol oxidase subunit I         | 18.46 | 18.29 |       |       | 19.44 | 19.61 |       |       | 1.1   |  | 12.29 | 5.35  |
| PPUTLS46_023293 | short chain dehydrogenase                        | 18.46 | 18.85 | 19.96 | 19.46 | 19.03 | 18.86 |       | 0.66  | 0.16  |  | 2.3   | 1.26  |
| PPUTLS46_017384 | transcriptional regulator MvaT, P16 subunit, put | 18.46 | 17.85 | 19.85 | 19.01 | 17.37 | 18.47 |       | 0.82  | 0.2   |  | 2.88  | 0.8   |
| PPUTLS46_022526 | glucokinase                                      | 18.46 | 17.28 | 18.1  | 16.82 |       |       |       | -0.43 |       |  | 0.49  | 0.96  |
| PPUTLS46_000585 | Protein of unknown function (DUF2628)            | 18.45 | 20.75 | 17.94 | 17.63 | 19.74 | 19.27 |       | -0.53 | 0.37  |  | 1.35  | 0.81  |
| PPUTLS46_004329 | lipoprotein                                      | 18.45 | 20.38 | 18.7  | 19.03 | 16.61 | 19.81 |       | -0.48 | -1.67 |  | 0.66  | 0.37  |
| PPUTLS46_021886 | 3-hydroxyisobutyrate dehydrogenase               | 18.45 | 16.48 | 18.43 | 17.8  | 16.15 | 16.52 |       | 0.17  | -0.13 |  | 0.86  | 1.14  |
| PPUTLS46_009929 | B12-dependent methionine synthase                | 18.43 | 17.5  | 17.62 | 17.24 | 18.01 | 18.02 |       | -0.23 | 0.08  |  | 1.77  | 1.13  |
| PPUTLS46_025826 | acyl-CoA dehydrogenase-like protein              | 18.42 | 15.59 | 15.61 | 16.8  | 17    | 16.35 |       | -0.16 | -0.72 |  | 1.1   | 0.54  |
| PPUTLS46_022486 | Porin B                                          | 18.42 | 18.09 | 17.15 | 16.95 |       |       |       | -1.06 |       |  | 10.92 | 24.96 |



|                 |                                                |       |       |       |       |       |       |       |       |        |      |
|-----------------|------------------------------------------------|-------|-------|-------|-------|-------|-------|-------|-------|--------|------|
| PPUTLS46_013773 | hydrophobe/amphiphile efflux-1 (HAE1) family   | 18.41 | 18.02 | 18.26 | 18.51 | 17.63 | 17.3  | 0.2   | -0.32 | 0.65   | 3.67 |
| PPUTLS46_008434 | heat shock protein Hsp20                       | 18.41 | 19.04 |       |       | 16.64 | 16.81 |       | -0.95 | 3.11   | 2.44 |
| PPUTLS46_000250 | malonyl CoA-acyl carrier protein transacylase  | 18.41 | 14.43 | 18.89 | 18.33 | 16.31 | 15.74 | 0.47  | -0.88 | 1.2    | 0.62 |
| PPUTLS46_007534 | peptidase M24                                  | 18.4  | 18.76 | 17.67 | 18.84 | 19.99 | 20.71 | -0.74 | 1.17  | 0.39   | 2.53 |
| PPUTLS46_021041 | long-chain-fatty-acid--CoA ligase              | 18.36 | 18.67 | 18.28 | 18.34 | 21.77 | 21.47 | -0.22 | 2.71  | 0.53   | 6.88 |
| PPUTLS46_017449 | aldehyde dehydrogenase                         | 18.36 | 17.41 | 18.54 | 17.33 | 20.13 | 19.59 | 0.64  | 1.64  | 0.22   | 4.48 |
| PPUTLS46_015744 | GTP cyclohydrolase I                           | 18.36 | 17.35 | 18.04 | 17.79 | 16.62 | 17.74 | 0.08  | 0.03  | 0.86   | 1    |
| PPUTLS46_026281 | multi-sensor hybrid histidine kinase           | 18.33 | 19.75 | 20.2  | 20.16 | 19.12 | 19.03 | 0.23  | 0.34  | 1.18   | 0.74 |
| PPUTLS46_026211 | glycolate oxidase iron-sulfur subunit          | 18.32 | 18.61 | 20.71 | 19.72 |       |       | 1.18  |       | 2.73   | 2.12 |
| PPUTLS46_009674 | transcriptional regulator CysB                 | 18.31 | 18.71 | 20.01 | 19.75 | 18.96 | 17.34 | 0.92  | -0.01 | 2.85   | 0.96 |
| PPUTLS46_002522 | AcdA                                           | 18.31 | 16.2  | 17.98 | 16.8  | 17.95 | 17.24 | 0.85  | 0.46  | 0.34   | 0.64 |
| PPUTLS46_006756 | acyl-CoA dehydrogenase                         | 18.3  | 15.72 | 19.4  | 19.5  | 18.95 | 18.48 | 1.28  | 0.59  | 1.91   | 1.38 |
| PPUTLS46_012160 | Alpha amylase, catalytic region                | 18.3  | 17.81 | 20.71 | 19.47 | 18.31 | 18.63 | 1.3   | 0.39  | 2.75   | 2.11 |
| PPUTLS46_021271 | Protein of unknown function (DUF465)           | 18.29 | 18.48 | 15.79 | 18.73 | 18.8  | 19.04 | -0.84 | 0.33  | 0.66   | 1.67 |
| PPUTLS46_016664 | FOF1 ATP synthase subunit delta                | 18.29 | 15.04 | 20.38 | 20.1  | 18.31 | 17.71 | 1.98  | 0.07  | 2.12   | 0.98 |
| PPUTLS46_017109 | ppGpp synthetase I SpoT/RelA                   | 18.29 | 16.75 | 18.95 | 18.32 | 17.24 | 16.48 | 0.42  | -0.41 | 1.52   | 0.5  |
| PPUTLS46_021581 | histidine triad                                | 18.29 | 17.09 | 18.76 | 15.98 | 17.17 | 18.23 | -1.1  | 0.03  | 0.43   | 1    |
| PPUTLS46_018276 | efflux transporter RND family, MFP subunit     | 18.29 | 17.05 |       |       |       |       |       |       | 1.85   | 0.81 |
| PPUTLS46_003687 | YD repeat-containing protein                   | 18.28 | 18.14 |       |       | 19.28 | 19.25 |       | 1.08  | 9.5    | 7.36 |
| PPUTLS46_020466 | flagellar hook-associated protein FlgL         | 18.28 | 17.68 | 18.82 | 19.56 | 18.52 | 18.56 | 0.46  | 0.61  | 1.5    | 4.06 |
| PPUTLS46_009844 | spore coat U domain-containing protein         | 18.28 | 18.22 | 17.99 | 16.62 | 17.37 | 18.19 | -0.28 | -0.3  | 1.37   | 0.51 |
| PPUTLS46_007679 | lipopolysaccharide biosynthesis protein        | 18.26 | 18.3  | 21.13 | 20.96 | 20.2  | 19.34 | 2.41  | 1.18  | 9.36   | 3.1  |
| PPUTLS46_013538 | D-alanine--D-alanine ligase                    | 18.26 | 17.82 | 18.06 | 17.05 | 18.29 | 18.19 | -0.02 | 0.41  | 1.09   | 7.89 |
| PPUTLS46_020016 | GntR family transcriptional regulator          | 18.26 | 17.84 | 18.04 | 17.62 | 17.6  | 17.27 | -0.14 | -0.19 | 3.2    | 2.62 |
| PPUTLS46_005221 | penicillin-binding protein 1A                  | 18.26 | 17.47 | 17.55 | 17.08 | 15.78 | 18.08 | -0.28 | -0.17 | 2.13   | 0.88 |
| PPUTLS46_003887 | chaperone protein HscA                         | 18.26 | 17.75 | 16.71 | 16.11 | 15.26 | 16.89 | -1.32 | -0.56 | 6.88   | 1.5  |
| PPUTLS46_015064 | recombination associated protein               | 18.25 | 18.17 | 19.05 | 18.32 | 18.92 | 17.76 | 0.23  | 0.04  | 1.55   | 1.02 |
| PPUTLS46_025689 | HlyD family type I secretion membrane fusion   | 18.25 | 18.96 | 20.11 | 18.8  | 18.55 | 18.33 | 0.32  | 0.18  | 1.29   | 0.79 |
| PPUTLS46_015424 | oxoacyl-(acyl carrier protein) reductase       | 18.25 | 18.32 | 19    | 18.01 | 17.8  | 19.01 | 0.03  | 0.45  | 1      | 0.57 |
| PPUTLS46_018281 | transporter hydrophobe/amphiphile efflux-1     | 18.25 | 17.1  |       |       |       |       |       |       | 2.05   | 0.8  |
| PPUTLS46_006081 | DNA topoisomerase IV subunit A                 | 18.24 | 17.25 | 18.68 | 18.73 | 17.54 | 17.92 | 0.56  | 0.06  | 2.12   | 1.06 |
| PPUTLS46_005566 | phosphoribosyl-AMP cyclohydrolase              | 18.24 | 17.12 | 17.27 | 17.27 | 17.18 | 13.68 | -0.11 | -0.02 | 1.28   | 0.98 |
| PPUTLS46_026491 | glutathione reductase                          | 18.24 | 17.06 | 16.31 | 16.53 | 16.54 | 16.83 | -0.71 | -0.22 | 2.14   | 1.41 |
| PPUTLS46_025303 | dipeptidase, putative                          | 18.23 | 17.97 | 18.64 | 18.58 | 20.06 | 18.83 | 0.27  | 0.88  | 2.05   | 2.17 |
| PPUTLS46_013013 | Uncharacterized protein conserved in bacteria  | 18.23 | 18.39 | 17.37 | 18.32 | 18.18 | 18.36 | -0.43 | 0.21  | 0.57   | 0.56 |
| PPUTLS46_015659 | Polysaccharide export protein                  | 18.22 | 17    | 17.31 | 17.66 | 17.1  | 17.03 | 0.03  | -0.05 | 1      | 0.87 |
| PPUTLS46_008579 | Predicted metal-binding protein                | 18.22 | 16.71 |       |       |       |       |       |       | 1.29   | 0.77 |
| PPUTLS46_015779 | chorismate synthase                            | 18.21 | 18.42 | 17.81 | 17.37 | 18.39 | 17.52 | -0.41 | 0.01  | 2.18   | 1.04 |
| PPUTLS46_013683 | formyltetrahydrofolate deformylase             | 18.21 | 17.28 | 18.46 | 17.99 | 17.29 | 17.42 | 0.15  | 0.01  | 1.34   | 0.95 |
| PPUTLS46_024593 | bifunctional glutamine-synthetase              | 18.2  | 16.33 | 19.08 | 18.5  | 16.54 | 15.73 | 0.66  | -0.16 | 1.68   | 0.83 |
| PPUTLS46_023818 | selenocysteine synthase                        | 18.2  | 17.27 | 17.57 | 17.62 | 16.02 | 15.03 | 0.01  | -1.13 | 1.03   | 2.72 |
| PPUTLS46_009189 | TonB-dependent siderophore receptor            | 18.19 | 17.52 | 19.32 | 20.32 |       |       | 0.98  |       | 1.89   | 1.78 |
| PPUTLS46_008159 | Dyp-type peroxidase family protein             | 18.18 | 17.57 |       |       | 17.87 | 17.65 |       | 0.06  | 7.7    | 0.84 |
| PPUTLS46_013083 | fumarylacetoacetase                            | 18.18 | 15.78 | 19.26 | 19    | 14.67 | 16.96 | 1.08  | -0.08 | 1.85   | 1.05 |
| PPUTLS46_000145 | acyl-CoA dehydrogenase                         | 18.17 | 17.6  | 21.03 | 20.31 | 17.41 | 18.58 | 2.39  | 0.15  | 8.13   | 0.87 |
| PPUTLS46_023388 | two component LuxR family transcriptional      | 18.17 | 18.12 | 16.81 | 16.73 | 16.93 | 19.81 | -1.05 | 0.73  | 4.82   | 0.65 |
| PPUTLS46_014008 | signal peptidase I                             | 18.15 | 17.12 | 18.09 | 17.95 | 20.07 | 17.49 | 0.14  | 0.18  | 1.24   | 0.91 |
| PPUTLS46_017074 | LysR family transcriptional regulator          | 18.15 | 17.12 | 18.43 | 18.1  | 17.01 | 17.26 | 0.28  | 0.02  | 1.64   | 1.02 |
| PPUTLS46_000265 | 3-oxoacyl-(acyl carrier protein) synthase II   | 18.13 | 18.51 | 16.68 | 17.84 | 18.27 | 18.45 | -0.11 | 0.22  | 0.88   | 0.65 |
| PPUTLS46_020376 | Hpt protein                                    | 18.12 | 18.63 | 17.09 | 13.36 | 17.14 | 17.89 | -0.93 | -0.23 | 1.35   | 0.69 |
| PPUTLS46_004289 | methyl-accepting chemotaxis sensory transducer | 18.12 | 18.08 | 18.03 | 19.3  | 16.96 | 16.65 | 0.53  | -0.73 | 0.61   | 4.13 |
| PPUTLS46_006761 | AMP nucleosidase                               | 18.11 | 16.88 | 16.85 | 17.23 | 18.42 | 17.79 | -0.08 | 0.2   | 1.15   | 1.27 |
| PPUTLS46_013488 | 16S rRNA m(4)C1402 methyltransferase           | 18.11 | 17.86 | 18.39 | 16.95 | 18.12 | 17.69 | -0.16 | 0.08  | 0.79   | 1.23 |
| PPUTLS46_000445 | sporulation domain-containing protein          | 18.1  | 17.79 | 18.14 | 18.58 | 18.29 | 18.31 | 0.16  | 0.49  | 0.8    | 4.94 |
| PPUTLS46_025751 | gluconate 2-dehydrogenase acceptor subunit     | 18.1  | 18.09 | 19.43 | 19.05 |       |       | 0.91  |       | 4.88   | 2.3  |
| PPUTLS46_016594 | chromosomal replication initiation protein     | 18.09 | 17.85 | 17.54 | 16.24 | 18.45 | 17.06 | -0.41 | 0.21  | 1.56   | 0.78 |
| PPUTLS46_025741 | 2Fe-2S iron-sulfur cluster binding protein     | 18.09 | 17.16 | 20.03 | 18.59 | 17.68 | 17.4  | 0.73  | 0.17  | 1.74   | 0.63 |
| PPUTLS46_016699 | glucosamine--fructose-6-phosphate              | 18.08 | 19.58 | 18.69 | 18.84 | 20.22 | 20.82 | -0.48 | 0.58  | 0.58   | 1.42 |
| PPUTLS46_008989 | hypothetical protein                           | 18.08 | 16.82 |       |       |       |       |       |       | 1.5    | 0.79 |
| PPUTLS46_023166 | two component Fis family transcriptional       | 18.07 | 19.14 | 17.79 | 18.42 | 20.09 | 19.67 | -0.56 | 0.7   | 0.49   | 1.7  |
| PPUTLS46_012010 | alpha/beta hydrolase fold family protein       | 18.06 | 18.15 | 20.99 | 20.32 | 18.5  | 17.97 | 2.12  | 0.18  | 6.31   | 1.36 |
| PPUTLS46_020441 | flagellar protein FljS                         | 18.06 | 16.88 |       |       | 16.08 | 15.03 |       | -0.71 | 1.64   | 1.92 |
| PPUTLS46_024188 | anthranilate phosphoribosyltransferase         | 18.05 | 18.23 | 18.86 | 18.18 | 16.91 | 18.11 | 0.17  | -0.45 | 1.32   | 0.5  |
| PPUTLS46_023688 | transcription antitermination protein NusB     | 18.05 | 18.42 | 18.24 | 18.76 | 15.56 | 18.09 | 0.6   | -0.44 | 0.29   | 0.75 |
| PPUTLS46_006721 | PhoH family protein                            | 18.05 | 17.12 | 15.98 | 16.04 | 15.56 | 15.74 | -1.14 | -1.15 | 3.57   | 3.8  |
| PPUTLS46_004791 | sulfate ABC transporter, periplasmic           | 18.03 | 17.78 | 19.17 | 18.54 | 18.14 | 17.57 | 0.71  | 0.06  | 3.73   | 1.1  |
| PPUTLS46_023423 | arginine decarboxylase                         | 18.03 | 18.64 | 19.66 | 18.58 | 17.83 | 16.98 | 0.32  | -0.2  | 1.35   | 1.29 |
| PPUTLS46_004821 | NLPA lipoprotein                               | 18.03 | 17.53 | 17.1  | 17.66 | 17.79 | 18.88 | -0.04 | 0.19  | 0.9    | 1.19 |
| PPUTLS46_023353 | 3-ketoacyl-(acyl-carrier-protein) reductase    | 18.03 | 17.26 | 20.06 | 19.57 | 17.73 | 15.62 | 1.84  | -0.3  | 7.78   | 0.76 |
| PPUTLS46_022826 | PTS IIA-like nitrogen-regulatory protein PtsN  | 18.02 | 17.09 | 17.78 | 18.14 | 17.86 | 16.76 | 0.07  | 0.56  | 1.07   | 0.28 |
| PPUTLS46_024218 | ribulose-phosphate 3-epimerase                 | 18.02 | 18.16 | 18.65 | 16.65 | 15.7  | 17.5  | -0.17 | 0     | 0.86   | 0.98 |
| PPUTLS46_018074 | aminotransferase                               | 18.02 | 17.89 | 18.48 | 16.42 | 14.24 | 18.12 | -0.24 | -0.44 | 0.8    | 0.83 |
| PPUTLS46_025644 | hypothetical protein                           | 18.01 | 17.88 | 18.77 | 17.45 | 18.55 | 18.27 | 0.2   | 0.54  | 0.8    | 3.81 |
| PPUTLS46_016194 | DNA polymerase I                               | 18.01 | 18.35 | 19.19 | 19.33 | 18.36 | 18.05 | 0.48  | 0.05  | 1.78   | 1.04 |
| PPUTLS46_015139 | Cro/CI family transcriptional regulator        | 18.01 | 17.62 |       |       | 17.59 | 16.42 |       | 0     | 150.67 | 1.04 |
| PPUTLS46_013633 | Putative heme iron utilization protein         | 18.01 | 17.47 | 15.68 | 15    | 17.53 | 18.49 | -2.04 | 0.05  | 8.08   | 1.03 |
| PPUTLS46_004754 | protease                                       | 18    | 16.92 |       |       | 17.11 | 15.19 |       | -0.13 | 1.78   | 0.88 |
| PPUTLS46_016229 | hypothetical protein                           | 17.99 | 18.73 | 19.25 | 19.98 | 20.05 | 19.92 | 0.15  | 1.12  | 1.1    | 2.5  |
| PPUTLS46_012888 | Predicted metalloprotease                      | 17.99 | 16.48 | 18.82 | 18.04 | 18.31 | 18.18 | 0.43  | 0.57  | 1.51   | 1.73 |
| PPUTLS46_007719 | hexapeptide repeat-containing transferase      | 17.97 | 16.97 | 19.35 | 17.97 | 18.65 | 19.3  | 0.28  | 1.13  | 1.27   | 2.65 |
| PPUTLS46_013708 | Predicted ATPase                               | 17.96 | 18.4  | 19.42 | 19.18 | 17.23 | 18.04 | 0.66  | -0.52 | 2.24   | 0.33 |
| PPUTLS46_019906 | Uncharacterized protein conserved in bacteria  | 17.93 | 17.62 |       |       | 18.48 | 18.98 |       | 0.76  | 24.14  | 2.71 |
| PPUTLS46_019671 | OmpA/MotB domain protein                       | 17.93 | 17.26 | 17.95 | 17.97 | 17.53 | 16.19 | 0.15  | -0.16 | 1.34   | 0.77 |
| PPUTLS46_014294 | Uncharacterized protein conserved in bacteria  | 17.93 | 19.42 | 15.98 | 16.79 |       |       | -0.79 |       | 1.57   | 1.11 |
| PPUTLS46_018306 | ThiJ/Ppl domain protein                        | 17.92 | 19.19 | 21.09 | 20.94 | 18.48 | 19.22 | 1.5   | 0.62  | 2.45   | 0.51 |

|                 |                                                  |       |       |       |       |       |       |       |       |       |      |
|-----------------|--------------------------------------------------|-------|-------|-------|-------|-------|-------|-------|-------|-------|------|
| PPUTLS46_025058 | adenosine nucleotide hydrolase NudE              | 17.92 | 17.38 |       |       |       |       |       |       | 8.49  | 1.39 |
| PPUTLS46_012968 | inner membrane protein yjiY                      | 17.91 | 19.51 | 19.99 | 19.9  | 18.87 | 17.68 | 0.28  | 0.01  | 1.2   | 0.98 |
| PPUTLS46_012710 | 3-hydroxydecanoyl-(acyl carrier protein)         | 17.91 | 16.78 | 19.6  | 19.04 | 16.71 | 18.41 | 1.44  | 0.08  | 3.89  | 0.96 |
| PPUTLS46_013988 | anti sigma-E protein, RseA                       | 17.9  | 17.33 | 16.91 | 14.98 | 21.1  | 18.32 | -0.48 | 0.71  | 1.4   | 1.39 |
| PPUTLS46_020446 | flagellar cap protein FliD                       | 17.9  | 16.95 | 19.56 | 19.17 | 19.28 | 18.81 | 1.55  | 1.34  | 5.33  | 3.99 |
| PPUTLS46_018316 | 4-hydroxyphenylpyruvate dioxygenase              | 17.9  | 17.5  | 18.49 | 19.03 | 17.72 | 16.59 | 0.42  | -0.09 | 1.56  | 0.82 |
| PPUTLS46_016009 | NAD(P) transhydrogenase subunit alpha            | 17.89 | 18.62 | 18.85 | 18    | 21.35 | 21.36 | 0.06  | 2.45  | 1.04  | 4.32 |
| PPUTLS46_001027 | phosphate acetyltransferase                      | 17.88 | 17.12 | 16.19 | 16.66 | 16.92 | 16.87 | -0.52 | -0.09 | 1.82  | 1.43 |
| PPUTLS46_017144 | TIGR00255 family protein                         | 17.88 | 16.86 | 18.71 | 18.11 |       |       | 0.58  |       | 2.24  | 0.89 |
| PPUTLS46_023478 | ATP-NAD/AcoX kinase                              | 17.88 | 17.29 | 15.9  | 14.34 |       |       | -1.46 |       | 2.52  | 1.03 |
| PPUTLS46_014329 | response regulator receiver modulated            | 17.87 | 16.17 | 17.31 | 16.39 | 17.53 | 16.11 | -0.5  | 1.2   | 0.43  | 0.04 |
| PPUTLS46_001187 | NAD/FAD-dependent oxidoreductase-like protein    | 17.86 | 17.09 |       |       | 18.43 | 17.37 |       | 0.04  | 2.96  | 1.02 |
| PPUTLS46_000030 | heat shock protein HtpX                          | 17.86 | 17.48 | 17.25 | 18.11 | 16.68 | 16.33 | -0.34 | -0.68 | 0.6   | 6.04 |
| PPUTLS46_009659 | phospho-2-dehydro-3-deoxyheptonate aldolase      | 17.85 | 17.88 | 18.76 | 18.29 | 18.24 | 17.6  | 0.44  | 0.12  | 2.47  | 1.21 |
| PPUTLS46_003757 | peptide chain release factor 3                   | 17.85 | 16.66 | 18.02 | 16.85 | 16.26 | 15.04 | 0.71  | -0.34 | 0.18  | 1.41 |
| PPUTLS46_006356 | Ferritin, Dps family protein                     | 17.85 | 16.55 | 16.6  | 16.85 |       |       | -0.12 |       | 1.22  | 0.93 |
| PPUTLS46_012948 | large-conductance mechanosensitive channel       | 17.84 | 18.36 | 18.94 | 18.18 | 18.17 | 17.28 | 0.18  | 0.01  | 1.23  | 1.03 |
| PPUTLS46_017554 | aldehyde dehydrogenase family protein            | 17.82 | 17.62 | 17.76 | 17.82 | 17.33 | 18.01 | 0.27  | 0.25  | 0.27  | 0.62 |
| PPUTLS46_009999 | Uncharacterized conserved protein                | 17.82 | 16.33 |       |       |       |       |       |       | 0.97  | 0.97 |
| PPUTLS46_001032 | OmpA/MotB domain-containing protein              | 17.81 | 19.13 | 18.39 | 18.36 | 18.15 | 17.9  | -0.32 | -0.21 | 0.66  | 0.79 |
| PPUTLS46_020361 | flagellar motor switch protein FliM              | 17.8  | 17.43 | 18.19 | 18.13 | 17.98 | 18.04 | 0.32  | 0.5   | 2.36  | 4.56 |
| PPUTLS46_016104 | ABC-type uncharacterized transport system        | 17.8  | 17.51 | 17.83 | 17.04 | 17.44 | 16.53 | 0.03  | -0.03 | 1     | 1.12 |
| PPUTLS46_009529 | bifunctional 5,10-methylene-tetrahydrofolate     | 17.79 | 17.71 | 18.24 | 18.28 | 17.51 | 18.7  | 0.16  | 0.2   | 1.36  | 0.81 |
| PPUTLS46_021506 | biopolymer transport protein TolQ                | 17.79 | 18.01 | 18.41 | 18.3  | 17.33 | 16.87 | 0.08  | -0.21 | 1.13  | 1.53 |
| PPUTLS46_010604 | diguanylate cyclase                              | 17.78 | 18.48 | 19.03 | 18.79 | 16.93 | 18.14 | 0.26  | -0.78 | 1.35  | 0.29 |
| PPUTLS46_012690 | NAD(P)H-dependent glycerol-3-phosphate           | 17.77 | 17.85 | 16.75 | 17.84 | 18.35 | 17.41 | -0.43 | 0.09  | 0.6   | 1.1  |
| PPUTLS46_023873 | excinuclease ABC subunit A                       | 17.77 | 17.14 | 18.51 | 18.67 | 17.23 | 16.36 | 0.73  | -0.04 | 2.69  | 0.87 |
| PPUTLS46_009949 | electron transport protein SCO1/SenC             | 17.76 | 17.25 | 16.81 | 17.27 | 18.3  | 16.99 | 0     | 0.21  | 1.05  | 0.78 |
| PPUTLS46_005191 | sporulation domain protein                       | 17.76 | 17.76 | 17.48 | 15.74 | 17.87 | 17.26 | -0.27 | 0.05  | 1.26  | 1.04 |
| PPUTLS46_005796 | Protein of unknown function (DUF1090)            | 17.75 | 18.86 | 18.91 | 18.62 | 18.97 | 19.72 | 0.09  | 0.13  | 0.93  | 1.09 |
| PPUTLS46_023328 | heavy metal translocating P-type ATPase          | 17.75 | 17.87 | 19.88 | 19.23 | 18.77 | 17.74 | 1.36  | 0.28  | 4.37  | 1.36 |
| PPUTLS46_006151 | tRNA threonylcarbamoyl adenosine modification    | 17.75 | 18.05 | 16.97 | 17.13 | 17.65 | 18.17 | -0.26 | 0.41  | 1.52  | 0.4  |
| PPUTLS46_020646 | succinylglutamate desuccinylase                  | 17.75 | 17.74 | 19.14 | 17.86 | 15.76 | 15.55 | 0.22  | -1.46 | 1.24  | 7.18 |
| PPUTLS46_012155 | trehalose synthase                               | 17.74 | 17.6  | 21.49 | 20.54 | 18.14 | 18.47 | 2.78  | 0.51  | 6.37  | 2.38 |
| PPUTLS46_000977 | nicotinate-nucleotide pyrophosphorylase          | 17.73 | 18.9  | 18.99 | 18.24 | 18.33 | 17.71 | 0.04  | -0.07 | 1.01  | 0.91 |
| PPUTLS46_007011 | Uncharacterized conserved protein                | 17.73 | 16.85 |       |       | 17.29 | 16.68 |       | -0.39 | 1.88  | 0.09 |
| PPUTLS46_019301 | ABC-type branched-chain amino acid transport     | 17.73 | 17.88 | 19.03 | 19.35 |       |       | 0.75  |       | 2.18  | 0.97 |
| PPUTLS46_002082 | phosphoglucomutase                               | 17.72 | 18.16 | 20.44 | 19.67 | 18.34 | 19    | 1.55  | 0.19  | 3.51  | 1.21 |
| PPUTLS46_006066 | DNA topoisomerase IV subunit B                   | 17.72 | 16.84 | 18.29 | 17.91 | 17.63 | 16.29 | 0.52  | -0.5  | 2.59  | 0.4  |
| PPUTLS46_012680 | phosphohistidine phosphatase, SixA               | 17.72 | 17.85 | 16.83 | 17.55 | 17.21 | 17.36 | -0.2  | -0.09 | 0.75  | 0.68 |
| PPUTLS46_011135 | cytochrome c, class I                            | 17.72 | 16.7  | 17.47 | 18.32 | 16.25 | 17.05 | 0.08  | 0.02  | 1.06  | 1.02 |
| PPUTLS46_020666 | arginine N-succinyltransferase                   | 17.72 | 18.11 | 17.85 | 17.79 |       |       | -0.21 |       | 0.54  | 0.96 |
| PPUTLS46_007196 | 30S ribosomal protein S15                        | 17.7  | 18.5  | 16.62 | 17.04 | 15.61 | 17.43 | -0.32 | -0.21 | 1.38  | 0.84 |
| PPUTLS46_014804 | alkyl hydroperoxide reductase/ Thiol specific    | 17.69 | 18.72 | 19.24 | 18.65 | 18.51 | 17.23 | 0.24  | 0.01  | 1.23  | 1.01 |
| PPUTLS46_011975 | tRNA-specific 2-thiouridylase MmmA               | 17.69 | 18.5  | 16.66 | 15.73 | 16.97 | 15.96 | -1.17 | -0.62 | 2.39  | 1.67 |
| PPUTLS46_010849 | Uncharacterized conserved protein                | 17.69 | 17.23 | 15.07 | 16.32 | 16.07 | 17.51 | -0.66 | -0.18 | 1.55  | 0.8  |
| PPUTLS46_025483 | hypothetical protein                             | 17.69 | 16.43 | 18.08 | 17.52 | 12.87 | 17.58 | 0.22  | -0.25 | 1.34  | 0.91 |
| PPUTLS46_004459 | transcription-repair coupling factor             | 17.68 | 17.29 | 18.28 | 18.12 | 16.7  | 16.84 | 0.57  | -0.23 | 5.13  | 2.35 |
| PPUTLS46_013993 | sigma E regulatory protein MucB/RseB             | 17.67 | 18.04 | 18.29 | 17.57 | 18.27 | 16.64 | 0.05  | -0.01 | 1.04  | 0.96 |
| PPUTLS46_006776 | asnC family transcriptional regulator            | 17.67 | 17.28 | 17.84 | 17.36 | 16.92 | 16.49 | 0.04  | -0.28 | 1.06  | 2.58 |
| PPUTLS46_025223 | serine O-acetyltransferase                       | 17.66 | 19.32 | 19.05 | 18.16 | 18.58 | 15.48 | 0.07  | -0.21 | 0.97  | 1.1  |
| PPUTLS46_006991 | EcoEI R domain-containing protein                | 17.66 | 18.03 | 13.79 | 16.18 | 18.26 | 16.21 | -0.75 | -0.03 | 1.35  | 0.95 |
| PPUTLS46_018059 | N-acetylglutamate synthase                       | 17.66 | 17.33 | 17.61 | 18.01 | 17.62 | 16.59 | 0.19  | -0.09 | 0.72  | 0.8  |
| PPUTLS46_023543 | ethanolamine ammonia lyase large subunit         | 17.65 | 15.7  | 15.87 | 16.15 |       |       | -0.16 |       | 1.18  | 1.09 |
| PPUTLS46_022811 | ABC transporter related protein                  | 17.63 | 17.73 | 18.35 | 17.76 | 18.71 | 18.27 | 0.19  | 0.71  | 1.45  | 2.85 |
| PPUTLS46_000695 | 3-hydroxybutyryl-CoA epimerase                   | 17.63 | 18.21 |       |       |       |       |       |       | 1.98  | 0.88 |
| PPUTLS46_023643 | 1-deoxy-D-xylulose-5-phosphate synthase          | 17.62 | 16.22 | 14.45 | 16.1  |       |       | -0.49 |       | 1.31  | 1.16 |
| PPUTLS46_006216 | iron ABC transporter, periplasmic iron-binding   | 17.59 | 17.43 | 18.41 | 17.57 | 16.83 | 16.09 | 0.19  | -0.4  | 1.37  | 2.02 |
| PPUTLS46_015524 | type 11 methyltransferase                        | 17.57 | 16.37 | 18.4  | 18.29 | 17.48 | 17.66 | 0.9   | 0.41  | 2.62  | 1.64 |
| PPUTLS46_003557 | type VI secretion protein, VC_A0107 family       | 17.56 | 18.91 | 18.29 | 17.42 | 17.05 | 17.3  | -0.01 | -0.13 | 1.04  | 0.86 |
| PPUTLS46_003957 | queuine tRNA-ribosyltransferase                  | 17.55 | 19.26 | 17.26 | 16.97 | 18.61 | 19.08 | -0.31 | 0.5   | 1.27  | 0.66 |
| PPUTLS46_021381 | Surface antigen                                  | 17.55 | 17.34 |       |       | 17.43 | 16.5  |       | 0     | 5.97  | 0.95 |
| PPUTLS46_016639 | chromosome-partitioning protein parB             | 17.55 | 17.27 | 18.8  | 18.62 | 17.33 | 18.25 | 1.14  | 0.06  | 9.37  | 1.04 |
| PPUTLS46_000460 | O-succinylhomoserine sulfhydrylase               | 17.53 | 19.36 | 18.98 | 18.03 | 17.99 | 18.31 | 0.07  | -0.61 | 0.97  | 0.56 |
| PPUTLS46_005891 | Predicted Zn-dependent proteases and their       | 17.52 | 18.17 |       |       | 17.31 | 17.12 |       | -0.01 | 1.78  | 0.94 |
| PPUTLS46_022831 | glmZ(sRNA)-inactivating NTPase                   | 17.5  | 17.04 | 16.38 | 17.19 | 17.08 | 16.83 | -0.09 | 0     | 0.86  | 0.65 |
| PPUTLS46_023273 | beta alanine--pyruvate transaminase              | 17.5  | 15.9  |       |       | 16.32 | 14.49 |       | -0.35 | 0.87  | 0.73 |
| PPUTLS46_014739 | Domain of unknown function (DUF4146)             | 17.5  | 18.01 | 19.03 | 17.48 | 16.02 | 17.95 | 0.07  | -0.75 | 1.04  | 0.48 |
| PPUTLS46_000235 | Predicted metal-binding, possibly nucleic        | 17.49 | 14.86 |       |       | 18.09 | 18.39 |       | 1.04  | 0.94  | 1.67 |
| PPUTLS46_010734 | O-acetylhomoserine aminocarboxypropyltransferase | 17.49 | 19.73 | 19.85 | 19.79 | 17.93 | 18.84 | 0.07  | 1.12  | 1.02  | 0.41 |
| PPUTLS46_001082 | glycerate dehydrogenase                          | 17.49 | 17.87 | 17.55 | 14.83 | 16.63 | 16.98 | -0.14 | 0.02  | 1.09  | 1.01 |
| PPUTLS46_005636 | ATP-dependent protease subunit HslV              | 17.49 | 16.93 | 15.36 | 15.15 | 15.52 | 16.08 | -1.76 | -0.62 | 13.39 | 2.37 |
| PPUTLS46_000495 | NADH:flavin oxidoreductase                       | 17.48 | 15.85 | 16.04 | 16.68 | 22.76 | 22.47 | -0.01 | 5     | 1.03  | 7.01 |
| PPUTLS46_020621 | magnesium transporter                            | 17.47 | 15.97 | 17.42 | 17.04 |       |       | 0.04  |       | 0.99  | 1.28 |
| PPUTLS46_021101 | Csbd family protein                              | 17.45 | 16.51 |       |       |       |       |       |       | 1.08  | 1.63 |
| PPUTLS46_015999 | glutaryl-CoA dehydrogenase                       | 17.44 | 17.3  | 17.14 | 15.76 | 17.39 | 17.84 | -0.24 | 0.1   | 1.31  | 1.17 |
| PPUTLS46_018411 | beta-lactamase/D-alanine carboxypeptidase        | 17.44 | 16.69 | 17.94 | 17.14 | 16.38 | 16.18 | 0.03  | -0.23 | 1.01  | 2.01 |
| PPUTLS46_012150 | glycogen branching enzyme                        | 17.43 | 18.29 | 20.23 | 19.36 | 16    | 16.91 | 1.23  | 0.02  | 2.38  | 1.01 |
| PPUTLS46_005051 | aldehyde dehydrogenase                           | 17.42 | 17.51 | 16.7  | 17.16 | 17.58 | 15.87 | -0.09 | 0.01  | 0.82  | 0.99 |
| PPUTLS46_022181 | ornithine carbamoyltransferase                   | 17.42 | 17.58 | 17.47 | 18.06 | 17.29 | 18.26 | 0.54  | 0.29  | 0.36  | 0.69 |
| PPUTLS46_014689 | Peptidase M23B                                   | 17.4  | 16.25 | 16.38 | 16.88 | 16.08 | 14.6  | 0.02  | -0.13 | 0.99  | 1.15 |
| PPUTLS46_005096 | cell division protein FtsX                       | 17.4  | 15.63 | 17.96 | 15.55 | 15.51 | 15.83 | 1.47  | -0.01 | 0.22  | 1.04 |
| PPUTLS46_007166 | preprotein translocase subunit SecE              | 17.38 | 18.92 | 18.43 | 18.25 | 18.43 | 16.9  | 0.31  | 0.01  | 0.76  | 1.02 |
| PPUTLS46_024158 | ubiquinone biosynthesis protein COQ7-like        | 17.38 | 16.51 | 18.17 | 17.23 | 18.06 | 18.15 | 0.18  | 1.02  | 1.25  | 3.73 |
| PPUTLS46_013703 | methyl-accepting chemotaxis sensory transducer   | 17.38 | 16.69 | 18.18 | 17.68 | 17.23 | 16.22 | 0.65  | -0.31 | 3.64  | 0.45 |

|                 |                                                  |       |       |       |       |       |       |       |       |       |       |
|-----------------|--------------------------------------------------|-------|-------|-------|-------|-------|-------|-------|-------|-------|-------|
| PPUTLS46_001277 | cytidine/deoxycytidylate deaminase family        | 17.38 | 16.85 |       |       |       |       |       |       | 3.56  | 3.79  |
| PPUTLS46_025068 | LysM domain/BON superfamily protein              | 17.36 | 19.57 | 22.34 | 21.59 | 16.99 | 19.35 | 2.14  | -2.27 | 2.31  | 0.03  |
| PPUTLS46_020221 | cytochrome c-type biogenesis protein CcmE        | 17.35 | 17.88 | 17.43 | 17.5  | 17.03 | 17.2  | -0.29 | -0.21 | 0.49  | 0.61  |
| PPUTLS46_024193 | anthranilate synthase component II               | 17.34 | 16.82 | 17    | 15.76 | 15.68 | 17.41 | -0.04 | -0.26 | 1.11  | 0.77  |
| PPUTLS46_025358 | alginate regulatory protein AlgP                 | 17.33 | 19.07 | 19.58 | 18.03 | 18.57 | 19.33 | 0.17  | 0.45  | 1.09  | 0.72  |
| PPUTLS46_020661 | succinylglutamic semialdehyde dehydrogenase      | 17.33 | 18.15 | 17.56 | 16.7  |       |       | -0.18 |       | 1.24  | 0.71  |
| PPUTLS46_005536 | methyl-accepting chemotaxis sensory transducer   | 17.31 | 18.59 | 18.48 | 18.88 | 18.88 | 18.76 | 0.36  | 0.25  | 0.72  | 1.2   |
| PPUTLS46_014284 | spermidine/putrescine ABC transporter ATPase     | 17.31 | 17.19 | 16.87 | 17.86 | 17.32 | 17.45 | 0.58  | 0.15  | 0.48  | 1.5   |
| PPUTLS46_012195 | propionyl-CoA carboxylase                        | 17.31 | 14.89 | 17.48 | 14.13 | 16.68 | 16.12 | -2.08 | 0.49  | 0.21  | 0.67  |
| PPUTLS46_001557 | extracellular solute-binding protein             | 17.29 | 16.33 |       |       | 16.37 | 16.02 |       | -0.01 | 0.94  | 0.9   |
| PPUTLS46_003002 | S-transferase                                    | 17.29 | 17.08 | 17.58 | 17.29 | 15.67 | 16.62 | 0.15  | -0.07 | 2.08  | 1.13  |
| PPUTLS46_024808 | hypothetical protein                             | 17.28 | 16.87 | 17.88 | 18.04 | 17.18 | 17.8  | 0.51  | 0.24  | 2.23  | 1.42  |
| PPUTLS46_004776 | RND family efflux transporter MFP subunit        | 17.27 | 16.95 | 18.79 | 18.11 | 17.24 | 17.8  | 1.05  | 0.25  | 4.65  | 1.47  |
| PPUTLS46_007974 | TenA family transcription regulator              | 17.27 | 14.96 |       |       |       |       |       |       | 1     | 1.29  |
| PPUTLS46_016489 | methionyl-tRNA formyltransferase                 | 17.26 | 17.98 | 17.9  | 17.19 | 17.54 | 17.57 | 0.03  | 0.28  | 1     | 0.66  |
| PPUTLS46_019996 | xanthine dehydrogenase                           | 17.25 | 17.26 | 18.2  | 17.79 |       |       | 0.52  |       | 3     | 1.17  |
| PPUTLS46_001832 | FKBP-type peptidylprolyl isomerase               | 17.24 | 16.28 |       |       | 17.36 | 16.23 |       | 0.46  | 0.94  | 0.45  |
| PPUTLS46_016374 | luciferase family protein                        | 17.24 | 16.35 | 16.02 | 14.97 | 15.87 | 14.78 | -0.62 | -0.41 | 2     | 1.61  |
| PPUTLS46_000310 | Uncharacterized protein conserved in bacteria    | 17.22 | 16.64 | 18.57 | 18.25 | 18.19 | 17.73 | 1.32  | 0.97  | 11.34 | 4.69  |
| PPUTLS46_000305 | hypothetical protein                             | 17.2  | 17.9  | 19.39 | 19.17 | 17.7  | 17.01 | 1.1   | 0.04  | 2.62  | 0.99  |
| PPUTLS46_007171 | ribosome maturation protein RimP                 | 17.2  | 17.45 | 17.07 | 17.41 | 16.17 | 17.28 | -0.51 | -0.49 | 0.17  | 0.45  |
| PPUTLS46_015759 | isochorismatase superfamily hydrolase            | 17.19 | 15.78 | 18.44 | 17.09 | 17.63 | 18.03 | 0.23  | 0.93  | 1.19  | 2.17  |
| PPUTLS46_011900 | Siroheme synthase                                | 17.18 | 17.52 | 17.75 | 16.46 | 18.32 | 18.5  | 0.02  | 0.75  | 0.99  | 2.42  |
| PPUTLS46_015159 | quinone oxidoreductase                           | 17.18 | 16.56 | 17.63 | 17.03 | 17.65 | 17.41 | 0.19  | 0.71  | 1.62  | 4.89  |
| PPUTLS46_023548 | ethanolamine ammonia-lyase small subunit         | 17.18 | 17.48 | 17.96 | 17.15 |       |       | 0.08  |       | 1.09  | 0.76  |
| PPUTLS46_000485 | Clostridium P-47 protein                         | 17.17 | 17.94 | 21.81 | 20.92 | 19.12 | 19.75 | 3     | 1.12  | 4.6   | 2.2   |
| PPUTLS46_024898 | ABC transporter related protein                  | 17.17 | 17.85 | 18.15 | 16.67 | 16.05 | 16.77 | 0.01  | -0.07 | 0.98  | 0.89  |
| PPUTLS46_002777 | exonuclease III                                  | 17.15 | 16.28 | 17.49 | 16.06 | 16.22 | 15.81 | 0.65  | -0.02 | 0.34  | 1.12  |
| PPUTLS46_014028 | pyridoxine 5'-phosphate synthase                 | 17.14 | 18.72 | 18.39 | 18.09 | 17.08 | 18.18 | 0.22  | -1.14 | 0.84  | 0.23  |
| PPUTLS46_025694 | diguanylate cyclase/phosphodiesterase            | 17.12 | 16.73 | 18.16 | 17.54 | 17.86 | 17.58 | 0.69  | 0.91  | 3.85  | 10.24 |
| PPUTLS46_003667 | YD repeat-containing protein                     | 17.1  | 17.42 | 19.82 | 18.92 | 18.48 | 18.35 | 1.54  | 0.92  | 3.42  | 2.97  |
| PPUTLS46_001052 | response regulator/TPR domain-containing protein | 17.1  | 16.52 | 15.69 | 14.99 | 16.7  | 15.02 | -1.1  | -0.08 | 4.56  | 0.89  |
| PPUTLS46_014139 | hexapeptide repeat-containing transferase        | 17.1  | 16.18 | 17.34 | 17.46 | 16.28 | 17.32 | 0.39  | 0.05  | 1.74  | 1.02  |
| PPUTLS46_007016 | hypothetical protein                             | 17.1  | 16.93 |       |       | 15.95 | 15.87 |       | -0.63 | 1.76  | 5.94  |
| PPUTLS46_022776 | ABC-type transport system involved in resistance | 17.09 | 17.56 | 15.59 | 13.49 | 18.15 | 17.43 | -1.48 | 0.3   | 2.02  | 1.4   |
| PPUTLS46_025408 | glutathione S-transferase domain-containing      | 17.09 | 17.34 | 19.12 | 18.92 | 17.84 | 17.47 | 1.39  | 0.36  | 4.44  | 1.76  |
| PPUTLS46_017999 | 2-octaprenyl-3-methyl-6-methoxy-1,4-benzoquinol  | 17.08 | 15.24 | 18.03 | 18.43 | 16.01 | 16.82 | 1.2   | 0.09  | 2.11  | 1.05  |
| PPUTLS46_009599 | TatD-related deoxyribonuclease                   | 17.04 | 17.51 |       |       | 17.82 | 17.19 |       | 0.16  | 1.13  | 1.2   |
| PPUTLS46_007674 | hypothetical protein                             | 17.03 | 18.25 | 18.62 | 19.46 | 17.08 | 16.87 | 0.05  | -0.12 | 1.01  | 0.86  |
| PPUTLS46_018024 | glycine dehydrogenase                            | 17.03 | 15.46 | 20.47 | 19.43 | 17.06 | 16.12 | 2.69  | 0.4   | 3.9   | 0.62  |
| PPUTLS46_020761 | RNA-binding S4 domain-containing protein         | 17.03 | 18.21 | 18.18 | 16.96 | 15.1  | 14.47 | 0.01  | -1.51 | 1.02  | 2.45  |
| PPUTLS46_000035 | aminotransferase AlaT                            | 17.02 | 17.39 | 17.94 | 16.3  | 17.44 | 17.35 | -0.08 | 0.07  | 0.9   | 1.08  |
| PPUTLS46_012883 | methyl-accepting chemotaxis sensory transducer   | 17.02 | 16.39 | 17.74 | 17.53 | 14.81 | 15.22 | 0.74  | -0.94 | 5.04  | 3.43  |
| PPUTLS46_004224 | D-alanyl-D-alanine                               | 17.02 | 18.31 | 17.66 | 17.81 |       |       | 0.53  |       | 0.54  | 0.69  |
| PPUTLS46_005846 | response regulator receiver modulated PAS/PAC    | 17.01 | 16.55 | 17.09 | 17.33 | 17.06 | 16.45 | 0.06  | 0.07  | 1.06  | 0.89  |
| PPUTLS46_000375 | diguanylate cyclase/phosphodiesterase with       | 17.01 | 16.58 | 18.34 | 17.82 | 15.63 | 16.85 | 1.09  | -0.19 | 7.89  | 0.76  |
| PPUTLS46_022521 | two component transcriptional regulator          | 17    | 16.41 | 15.97 | 15.61 |       |       | -0.76 |       | 7.25  | 5.59  |
| PPUTLS46_018049 | adenylate cyclase                                | 16.99 | 16.56 | 17.13 | 16.85 | 17.03 | 17.01 | 0.16  | 0.41  | 3.5   | 5.17  |
| PPUTLS46_006971 | hypothetical protein                             | 16.99 | 16.75 |       |       | 16.87 | 17.02 |       | 0.13  | 0.82  | 1.46  |
| PPUTLS46_006916 | acyl-CoA thioesterase II                         | 16.99 | 14.33 | 16.6  | 16.37 | 14.88 | 14.13 | 0.05  | -0.4  | 0.99  | 0.72  |
| PPUTLS46_008554 | outer membrane efflux protein                    | 16.97 | 17.93 | 15.76 | 16.06 |       |       | -0.57 |       | 1.64  | 0.67  |
| PPUTLS46_019971 | NAD-dependent DNA ligase LigA                    | 16.96 | 15.46 | 16.57 | 16.69 | 16.85 | 15.59 | 0.09  | 0.84  | 1.08  | 0.23  |
| PPUTLS46_024468 | carboxylesterase                                 | 16.95 | 15.57 | 18.41 | 17.37 | 14.35 | 16.61 | 0.76  | -0.07 | 1.87  | 0.94  |
| PPUTLS46_005611 | poly(3-hydroxyalkanoic acid) synthase 2          | 16.93 | 17.01 | 19.85 | 19.52 | 19.83 | 19.34 | 2.38  | 2.34  | 9.29  | 7.09  |
| PPUTLS46_021276 | cystathionine gamma-lyase                        | 16.92 | 14.08 | 17.15 | 16.03 | 17.48 | 18.15 | 0.36  | 1.18  | 0.8   | 1.67  |
| PPUTLS46_002992 | amidase                                          | 16.91 | 17.14 | 15.32 | 16.19 | 17.28 | 16.73 | -0.25 | 0.08  | 1.27  | 1.11  |
| PPUTLS46_013338 | carboxylesterase                                 | 16.89 | 16.69 | 16.12 | 16.08 | 16.59 | 18.46 | -0.42 | 0.12  | 2.75  | 0.94  |
| PPUTLS46_012425 | NoIW domain protein                              | 16.86 | 15.64 | 18.57 | 17.5  | 17.58 | 15.61 | 0.96  | 0.64  | 2.2   | 0.54  |
| PPUTLS46_006106 | rhodanese domain-containing protein              | 16.86 | 17.7  | 18.72 | 18.02 | 16.04 | 17.49 | 0.54  | -1.01 | 1.64  | 0.22  |
| PPUTLS46_019271 | extracellular solute-binding protein             | 16.86 | 18.31 | 19.75 | 19.54 |       |       | 1.08  |       | 1.94  | 0.68  |
| PPUTLS46_014003 | GTP-binding protein LepA                         | 16.85 | 17.49 | 18.23 | 18.11 | 18.24 | 17.41 | 0.43  | 0.39  | 1.63  | 1.44  |
| PPUTLS46_005321 | choline dehydrogenase                            | 16.85 | 18.08 | 17.91 | 18.53 | 15.24 | 16.47 | 0.48  | -0.09 | 0.64  | 0.91  |
| PPUTLS46_020481 | flagellar basal body P-ring protein              | 16.84 | 16.28 | 18.6  | 19.07 | 17.38 | 12.99 | 1.61  | -0.61 | 3.48  | 0.77  |
| PPUTLS46_010269 | Uncharacterized protein conserved in bacteria    | 16.83 | 18.49 | 18.57 | 18.44 | 19.14 | 17.91 | 0.06  | 0.31  | 0.98  | 1.18  |
| PPUTLS46_015434 | bifunctional 3-demethylubiquinone-9              | 16.83 | 18.31 | 18.26 | 16.99 | 16.2  | 17.84 | 0.06  | -1.39 | 1.02  | 0.16  |
| PPUTLS46_013518 | UDP-N-acetylmuramoyl-L-alanyl-D-glutamate        | 16.82 | 17.81 | 18.22 | 17.95 | 17.88 | 18.23 | 0.18  | 0.09  | 1.17  | 1.06  |
| PPUTLS46_013818 | AraC family transcriptional regulator            | 16.82 | 16.94 |       |       |       |       |       |       | 0.68  | 1.97  |
| PPUTLS46_005971 | Lipid A export ATP-binding/permease protein msbA | 16.79 | 17.16 | 17.63 | 18.04 | 16.58 | 17.16 | 0.1   | 0.56  | 1.1   | 0.21  |
| PPUTLS46_021446 | quinolinate synthetase                           | 16.79 | 16.62 | 15.1  | 14    | 16    | 16.44 | -1.52 | -0.12 | 3.49  | 0.64  |
| PPUTLS46_015539 | dTDP-4-dehydrorhamnose 3,5-epimerase             | 16.78 | 16.97 |       |       | 16.57 | 17.37 |       | 0.39  | 0.68  | 0.51  |
| PPUTLS46_016859 | DNA-dependent helicase II                        | 16.73 | 18.17 |       |       | 15.43 | 16.87 |       | -0.57 | 0.94  | 0.62  |
| PPUTLS46_004072 | cytochrome o ubiquinol oxidase subunit II        | 16.72 | 18.83 |       |       | 18.65 | 20.02 |       | 0.2   | 0.98  | 0.91  |
| PPUTLS46_009574 | hypothetical protein                             | 16.72 | 17.46 | 19.47 | 18.94 | 18.27 | 17.95 | 1.47  | 0.62  | 3.06  | 1.81  |
| PPUTLS46_002142 | Pyrrolo-quinoline quinone                        | 16.7  | 17.18 | 19.22 | 18.83 | 17.59 | 17.68 | 1.56  | 0.38  | 3.91  | 1.6   |
| PPUTLS46_017424 | extracellular solute-binding protein             | 16.69 | 15.97 | 16.72 | 18.26 | 18.56 | 17.88 | 0.05  | 1.6   | 1.01  | 4.71  |
| PPUTLS46_024413 | pyrroloquinoline quinone biosynthesis protein    | 16.69 | 16.01 | 17.95 | 18.1  |       |       | 1.24  |       | 3.87  | 5.56  |
| PPUTLS46_020471 | flagellar hook-associated protein FigK           | 16.68 | 18.84 | 18.69 | 19.9  | 19.15 | 18.68 | 0.44  | 0.22  | 0.79  | 1.11  |
| PPUTLS46_025148 | glutamate-cysteine ligase                        | 16.68 | 16.78 | 15.44 | 15.85 | 16.9  | 17.12 | -0.41 | 0.14  | 1.67  | 1.27  |
| PPUTLS46_015164 | HAD family hydrolase                             | 16.68 | 17.1  | 17.61 | 17.74 |       |       | 0.19  |       | 1.26  | 1.31  |
| PPUTLS46_012565 | hydroxyacylglylutathione hydrolase               | 16.66 | 17.79 | 18.11 | 16.79 | 18.49 | 16.99 | 0.07  | 0.21  | 1.03  | 1.13  |
| PPUTLS46_005076 | peptidase M16 domain-containing protein          | 16.66 | 16.24 | 17.28 | 17.37 | 17.77 | 16.29 | 0.54  | 0.12  | 2.51  | 1.1   |
| PPUTLS46_012828 | methylmalonate-semialdehyde dehydrogenase        | 16.64 | 18.37 | 22.38 | 22.06 | 18.58 | 17.68 | 3.45  | 0.13  | 3.67  | 1.07  |
| PPUTLS46_015549 | dTDP-4-dehydrorhamnose reductase                 | 16.64 | 16.11 | 14.91 | 15.87 | 14.88 | 16.2  | -0.17 | -0.05 | 1.19  | 0.92  |
| PPUTLS46_020586 | branched-chain alpha-keto acid dehydrogenase     | 16.64 | 15.57 | 17.53 | 15.68 |       |       | 0.68  |       | 0.49  | 3.02  |
| PPUTLS46_020726 | pterin-4-alpha-carbinolamine dehydratase         | 16.64 | 16.68 | 17.28 | 16.97 |       |       | 0.25  |       | 1.84  | 3.06  |

|                 |                                                  |       |       |       |       |       |       |       |       |        |       |
|-----------------|--------------------------------------------------|-------|-------|-------|-------|-------|-------|-------|-------|--------|-------|
| PPUTLS46_004334 | molybdenum cofactor biosynthesis protein B       | 16.62 | 15.54 | 17.11 | 16.64 | 15.74 | 17.26 | 0.36  | 0.09  | 1.76   | 1.05  |
| PPUTLS46_013833 | Conserved protein/domain typically associated    | 16.61 | 15.62 | 14.86 | 14.76 |       |       | -0.93 |       | 3.32   | 3.38  |
| PPUTLS46_016064 | citrate transporter                              | 16.61 | 16.35 |       |       |       |       |       |       | 4.29   | 13.23 |
| PPUTLS46_010919 | glyoxalase/bleomycin resistance protein/dioxygen | 16.6  | 14.67 | 15.63 | 16.05 | 13.51 | 14.58 | 0.03  | -0.44 | 1      | 1.36  |
| PPUTLS46_005016 | SAM-dependent methyltransferase                  | 16.57 | 16.81 | 17.99 | 18.15 | 16.62 | 13.65 | 0.8   | -0.08 | 2.44   | 1.06  |
| PPUTLS46_000045 | glutathione peroxidase                           | 16.57 | 17.23 | 18.35 | 17.72 | 14.14 | 14.21 | 0.62  | -1.62 | 1.89   | 3.41  |
| PPUTLS46_012918 | ubiquinol oxidase subunit I, cyanide insensitive | 16.55 | 17.09 | 19.63 | 19.15 | 21.57 | 20.89 | 2     | 3.72  | 4.45   | 6.34  |
| PPUTLS46_002227 | acyl-CoA synthetase                              | 16.55 | 16.9  |       |       | 17.5  | 16.7  |       | 0.26  | 0.71   | 1.36  |
| PPUTLS46_024833 | glycine betaine/L-proline ABC transporter,       | 16.55 | 17.79 | 17.33 | 18.6  |       |       | 0.89  |       | 0.46   | 0.74  |
| PPUTLS46_020486 | flagellar basal body L-ring protein              | 16.54 | 15.6  | 17.46 | 17.23 |       |       | 0.93  |       | 3.55   | 3.78  |
| PPUTLS46_024708 | hypothetical protein                             | 16.54 | 17.73 |       |       |       |       |       |       | 0.82   | 0.76  |
| PPUTLS46_020746 | FAD/FMN-containing dehydrogenases                | 16.53 | 16.34 | 14.96 | 17.12 | 16.3  | 15.39 | -0.76 | -0.01 | 0.6    | 1.08  |
| PPUTLS46_003527 | type VI secretion lipoprotein, VC_A0113 family   | 16.52 | 16.58 |       |       | 18.15 | 19.71 |       | 1.4   | 1.1    | 2.17  |
| PPUTLS46_007081 | SmpA/OmlA domain-containing protein              | 16.52 | 16.75 | 16.64 | 15.8  | 16.17 | 16.47 | -0.12 | -0.35 | 1.3    | 0.23  |
| PPUTLS46_002012 | Extracellular solute-binding protein             | 16.52 | 16.75 |       |       |       |       |       |       | 0.81   | 2.21  |
| PPUTLS46_009829 | multi-sensor signal transduction histidine       | 16.5  | 17.35 | 15.63 | 16.18 | 15.14 | 17.2  | 0.02  | -1.01 | 1.01   | 0.38  |
| PPUTLS46_002302 | hydroxymethylglutaryl-CoA lyase                  | 16.49 | 17.06 | 15.12 | 16.87 | 17.66 | 18.07 | -0.75 | 0.58  | 0.55   | 1.78  |
| PPUTLS46_025113 | RNA-binding S4 domain-containing protein         | 16.49 | 16.66 |       |       |       |       |       |       | 0.93   | 2.61  |
| PPUTLS46_022276 | glutamate synthase                               | 16.48 | 16.96 | 18.63 | 18.09 |       |       | 1.15  |       | 3.02   | 1.49  |
| PPUTLS46_016454 | coproporphyrinogen III oxidase                   | 16.44 | 14.04 |       |       | 16.31 | 16.01 |       | 0.1   | 1.48   | 1.05  |
| PPUTLS46_021371 | hypothetical protein                             | 16.43 | 16.83 |       |       | 17.24 | 15.99 |       | 0.05  | 0.79   | 1.02  |
| PPUTLS46_013748 | 3-oxoadipate enol-lactonase                      | 16.41 | 16.73 |       |       | 16.23 | 15.98 |       | 0.01  | 0.86   | 0.96  |
| PPUTLS46_003777 | glycine betaine/L-proline ABC transporter        | 16.4  | 16.22 |       |       |       |       |       |       | 3.86   | 9.42  |
| PPUTLS46_013333 | ATP-dependent RNA helicase RhlB                  | 16.38 | 16.38 | 15.95 | 16.31 | 17.01 | 16.67 | -0.25 | 0.48  | 0.52   | 2.59  |
| PPUTLS46_020026 | hydroxyisourate hydrolase                        | 16.38 | 16.61 | 16.22 | 15.79 | 16.83 | 16.37 | -0.21 | 0.14  | 1.63   | 1.23  |
| PPUTLS46_021356 | malate:quinone oxidoreductase                    | 16.38 | 16.33 | 16.69 | 18.34 |       |       | 0.27  |       | 0.85   | 5.29  |
| PPUTLS46_006251 | replicative DNA helicase                         | 16.36 | 16.15 | 14.25 | 13.53 |       |       | -1.99 |       | 7.19   | 11.05 |
| PPUTLS46_009579 | CHAD domain-containing protein                   | 16.31 | 16.82 | 19.37 | 19.65 | 17.04 | 16.86 | 2.16  | 0.2   | 3.94   | 1.29  |
| PPUTLS46_004384 | ABC transporter ATP-binding protein              | 16.31 | 15.63 |       |       | 16.52 | 17.35 |       | 0.63  | 4.48   | 1.89  |
| PPUTLS46_021916 | branched chain amino acid ABC transporter        | 16.31 | 18.22 | 19.11 | 19.02 | 16.47 | 16.89 | 0.64  | -0.62 | 1.43   | 0.57  |
| PPUTLS46_025679 | hypothetical protein                             | 16.31 | 13.77 |       |       | 12.4  | 13.03 |       | -0.79 | 1.54   | 1.55  |
| PPUTLS46_012660 | hypothetical protein                             | 16.28 | 16.06 | 17.15 | 16.64 | 16.25 | 17.2  | 0.56  | 0.17  | 4.03   | 1.19  |
| PPUTLS46_006831 | DEAD/DEAH box helicase domain-containing protein | 16.26 | 17.42 | 15.81 | 16.22 | 16.08 | 15.58 | -0.16 | -0.09 | 0.83   | 1.11  |
| PPUTLS46_019311 | ABC transporter related protein                  | 16.23 | 16.93 | 14.7  | 15.12 |       |       | -0.74 |       | 1.88   | 1.41  |
| PPUTLS46_014839 | cysteine synthase B                              | 16.22 | 16.54 |       |       | 16.9  | 17.08 |       | 0.35  | 1.19   | 1.64  |
| PPUTLS46_019946 | DNA-binding protein, YbaB/EbfC family            | 16.21 | 16.96 |       |       | 18.88 | 17.74 |       | 1.12  | 0.8    | 2.09  |
| PPUTLS46_016814 | cobalamin synthesis protein, P47K                | 16.2  | 15.93 |       |       |       |       |       |       | 10.89  | 20.28 |
| PPUTLS46_026301 | hypothetical protein                             | 16.19 | 19.19 | 21.24 | 21.17 | 18.29 | 17.54 | 1.71  | 0.35  | 1.81   | 0.86  |
| PPUTLS46_006956 | hypothetical protein                             | 16.19 | 15.42 |       |       |       |       |       |       | 4.2    | 6.2   |
| PPUTLS46_025896 | GntR family transcriptional regulator            | 16.18 | 16.98 | 18.64 | 17.38 |       |       | 0.74  |       | 1.69   | 1.33  |
| PPUTLS46_019976 | cell division protein ZipA                       | 16.17 | 19.18 | 19.08 | 19.25 | 17.31 | 17.35 | 0.09  | -0.66 | 0.97   | 0.69  |
| PPUTLS46_001722 | amidase                                          | 16.15 | 14.51 |       |       |       |       |       |       | 2.04   | 2.6   |
| PPUTLS46_014244 | L-carnitine dehydratase/bile acid-inducible      | 16.13 | 16.75 | 16.21 | 16.39 | 17.25 | 16.52 | -0.4  | 0.26  | 0.41   | 1.3   |
| PPUTLS46_002197 | glycine betaine ABC transporter                  | 16.11 | 17.54 | 19.97 | 18.08 | 17.03 | 18.31 | 1.08  | 0.5   | 1.64   | 0.69  |
| PPUTLS46_025816 | nitrate/sulfonate/bicarbonate ABC transporter    | 16.1  | 16.96 | 16.8  | 17.02 | 18.17 | 18.35 | 0.42  | 1.09  | 0.56   | 2.28  |
| PPUTLS46_007231 | acetyl-CoA synthetase                            | 16.08 | 16.92 | 18.26 | 17.46 | 17.26 | 16.15 | 0.76  | 0.12  | 1.87   | 1.09  |
| PPUTLS46_022206 | DeoR family transcriptional regulator            | 16.06 | 15.77 | 16.27 | 16.41 | 14.55 | 15.14 | 0.07  | -0.29 | 1.1    | 1.65  |
| PPUTLS46_021946 | pyridoxamine 5'-phosphate oxidase                | 16.05 | 17.91 | 16.12 | 17.1  | 18.29 | 19.99 | -1.07 | 0.38  | 0.35   | 1.18  |
| PPUTLS46_000937 | PTS system fructose-specific transporter         | 16.01 | 15.1  | 14.96 | 14.69 |       |       | -0.43 |       | 2.43   | 5.35  |
| PPUTLS46_001657 | FAD-dependent pyridine nucleotide-disulfide      | 16    | 16.27 | 18.81 | 16.87 | 16.95 | 16.64 | 0.69  | 0.52  | 1.49   | 2.15  |
| PPUTLS46_025619 | surface adhesion protein                         | 15.94 | 16.93 | 15.04 | 15.05 | 17.55 | 18.23 | -0.55 | 0.59  | 1.67   | 1.54  |
| PPUTLS46_023708 | riboflavin biosynthesis protein RibD             | 15.92 | 17.2  | 16.63 | 16.48 | 16.02 | 16.74 | -0.25 | 0.86  | 0.72   | 0.32  |
| PPUTLS46_020301 | chemotaxis phosphatase, CheZ                     | 15.88 | 17.31 | 17.92 | 17.54 | 17.04 | 17.15 | 0.35  | 0.21  | 1.3    | 0.85  |
| PPUTLS46_009584 | Acyl-CoA thioesterase-like protein               | 15.86 | 15.78 |       |       | 19.23 | 19.1  |       | 3.19  | 5.24   | 17.75 |
| PPUTLS46_020861 | ATP-dependent DNA helicase RecQ                  | 15.85 | 15.48 |       |       |       |       |       |       | 168.42 | 30    |
| PPUTLS46_004594 | AraC family transcriptional regulator            | 15.85 | 16.4  |       |       |       |       |       |       | 1.38   | 2.26  |
| PPUTLS46_014074 | ATP-dependent protease La                        | 15.82 | 17.48 | 16.98 | 16.94 |       |       | 0.38  |       | 0.72   | 0.91  |
| PPUTLS46_024888 | hypothetical protein                             | 15.8  | 15.94 |       |       | 15.71 | 15.56 |       | 0.11  | 2.95   | 0.77  |
| PPUTLS46_003937 | Predicted outer membrane lipoprotein             | 15.78 | 15.91 | 16.78 | 16.37 | 15.26 | 15.72 | 0.46  | -0.39 | 2.36   | 0.2   |
| PPUTLS46_020156 | hydantoin racemase                               | 15.76 | 16.13 | 15.77 | 16.47 |       |       | 0.77  |       | 0.2    | 3.1   |
| PPUTLS46_018531 | Putative MetA-pathway of phenol degradation      | 15.71 | 12.81 | 16.99 | 18.54 | 14.77 | 16.66 | 1.85  | 0.54  | 1.85   | 1.24  |
| PPUTLS46_024478 | biotin synthase                                  | 15.67 | 16.87 |       |       |       |       |       |       | 0.94   | 1.32  |
| PPUTLS46_017989 | 2-octaprenyl-6-methoxyphenyl hydroxylase         | 15.64 | 14.27 | 16.75 | 16.56 | 15.17 | 14.64 | 1.11  | 0.41  | 2.77   | 0.47  |
| PPUTLS46_021616 | virulence factor family protein                  | 15.6  | 17.73 | 17.75 | 17.74 | 17.21 | 16.61 | 0.07  | 0.23  | 0.97   | 0.88  |
| PPUTLS46_002467 | cobalamin biosynthesis protein CobW              | 15.58 | 17.74 | 15.75 | 17.16 | 16.74 | 17.37 | -1.58 | 0.74  | 0.22   | 0.59  |
| PPUTLS46_004454 | Protein of unknown function (DUF2803)            | 15.56 | 17.19 | 15.23 | 15.96 | 13.88 | 15.16 | -0.54 | -0.06 | 0.62   | 0.94  |
| PPUTLS46_013398 | alpha/beta fold family hydrolase-like protein    | 15.54 | 13.5  | 15.57 | 15.9  |       |       | 0.48  |       | 1.39   | 2.69  |
| PPUTLS46_016189 | GTP-binding protein YsxC                         | 15.51 | 17.88 | 18.86 | 16.43 | 17.55 | 17.24 | 0.23  | 0.2   | 1.08   | 0.9   |
| PPUTLS46_003512 | ImcF domain-containing protein                   | 15.5  | 16.84 | 18.92 | 18.09 | 18.04 | 18.24 | 1.44  | 1.05  | 2.26   | 1.89  |
| PPUTLS46_022891 | cytoplasmic axial filament protein               | 15.5  | 17.83 | 17.47 | 17.66 | 15.51 | 17.17 | 0.34  | -1.66 | 0.82   | 0.21  |
| PPUTLS46_004781 | acriflavin resistance protein                    | 15.49 | 16.1  | 16.51 | 17.46 | 16.62 | 16.27 | 0.07  | 0.39  | 0.96   | 1.54  |
| PPUTLS46_019991 | xanthine dehydrogenase, small subunit            | 15.47 | 15.52 | 18.33 | 16.71 |       |       | 1.11  |       | 2.03   | 6.89  |
| PPUTLS46_014704 | DNA mismatch repair protein MutS                 | 15.47 | 17.37 | 15.17 | 17    |       |       | -1.8  |       | 0.16   | 0.97  |
| PPUTLS46_014379 | hypothetical protein                             | 15.46 | 15.01 | 17.38 | 16.83 | 15.82 | 15.57 | 1.65  | 0.6   | 9.88   | 7.27  |
| PPUTLS46_009444 | methyl-accepting chemotaxis transducer           | 15.45 | 15.36 | 17.16 | 17.91 | 17.43 | 16.86 | 1.23  | 1.57  | 2.38   | 5.51  |
| PPUTLS46_006566 | Zinc finger-domain-containing protein            | 15.44 | 17.47 | 17.07 | 14.54 |       |       | -0.03 |       | 1.03   | 0.93  |
| PPUTLS46_024688 | serine hydroxymethyltransferase                  | 15.43 | 15.2  |       |       | 14.31 | 15.43 |       | -0.29 | 15.72  | 0.62  |
| PPUTLS46_013978 | L-aspartate oxidase                              | 15.39 | 14.85 | 15.66 | 16.75 | 16.08 | 17.17 | 0.17  | 0.97  | 1.12   | 2.13  |
| PPUTLS46_024238 | spermidine/putrescine ABC transporter ATPase     | 15.39 | 17.38 | 20.2  | 19.62 | 15.07 | 16.38 | 2.24  | -1.21 | 2.52   | 0.32  |
| PPUTLS46_023633 | exodeoxyribonuclease VII small subunit           | 15.34 | 16.37 | 14.33 | 13.64 | 16.1  | 15.28 | -1.09 | 0.06  | 2.24   | 0.97  |
| PPUTLS46_022711 | nucleoid-associated protein NdpA                 | 15.23 | 13.96 | 16.57 | 15.2  | 16.31 | 14.53 | 0.28  | 0.21  | 1.25   | 0.86  |
| PPUTLS46_017934 | flagellar basal body-associated protein          | 15.12 | 14.65 | 13.32 | 15.47 |       |       | -0.59 |       | 0.68   | 36.64 |
| PPUTLS46_010529 | ribokinase                                       | 15.06 | 15.35 |       |       |       |       |       |       | 3.88   | 5.05  |
| PPUTLS46_008284 | bifunctional aldehyde dehydrogenase/enoyl-CoA    | 15.02 | 17.22 |       |       | 14.33 | 16.05 |       | -1.34 | 0.88   | 0.34  |
| PPUTLS46_002047 | RND family efflux transporter MFP subunit        | 14.98 | 13.83 | 14.52 | 14.6  | 15.36 | 13.25 | 0.04  | 0.85  | 1.01   | 0.42  |

|                 |                                                  |       |       |       |       |       |       |       |       |        |        |
|-----------------|--------------------------------------------------|-------|-------|-------|-------|-------|-------|-------|-------|--------|--------|
| PPUTLS46_007789 | glutamate-putrescine ligase                      | 14.96 | 14.75 | 14.53 | 14.63 | 14.81 | 16.57 | -0.01 | 0.06  | 0.89   | 1.02   |
| PPUTLS46_014184 | 16S rRNA-processing protein RimM                 | 14.95 | 15.94 |       |       | 15.35 | 16.73 |       | 0.58  | 1.76   | 0.59   |
| PPUTLS46_020281 | flagellar motor protein MotD                     | 14.93 | 15.2  |       |       | 15.98 | 15.52 |       | 0.54  | 4.35   | 2.1    |
| PPUTLS46_023101 | ColR                                             | 14.87 | 16.28 | 15.49 | 16.09 | 13.56 | 15.7  | 0.88  | -1.21 | 0.36   | 0.35   |
| PPUTLS46_025846 | FAD-dependent pyridine nucleotide-disulfide      | 14.83 | 14.07 |       |       |       |       |       |       | 9.98   | 11.29  |
| PPUTLS46_023181 | Extracellular solute-binding protein             | 14.8  | 15.81 | 19.56 | 17.94 | 19.32 | 16.25 | 2.3   | 1.1   | 2.72   | 1.5    |
| PPUTLS46_018099 | PotI                                             | 14.75 | 17.03 | 14.79 | 14.78 | 17.36 | 16.75 | -0.02 | 0.23  | 0.97   | 1.11   |
| PPUTLS46_017969 | cell division protein ZapA                       | 14.75 | 14.86 | 15.9  | 15.79 | 15.87 | 17.44 | 0.68  | 0.89  | 2.88   | 1.73   |
| PPUTLS46_021166 | VWA containing CoxE family protein               | 14.73 | 16.02 |       |       | 17.41 | 17.94 |       | 1.28  | 1.57   | 2.06   |
| PPUTLS46_001432 | CreA family protein                              | 14.73 | 14.34 |       |       |       |       |       |       | 335.64 | 207.53 |
| PPUTLS46_013793 | carboxyphosphoenolpyruvate phosphonmutase        | 14.66 | 17.93 | 16.79 | 15.6  |       |       | -0.07 |       | 0.95   | 0.84   |
| PPUTLS46_016019 | NAD(P)(+) transhydrogenase                       | 14.57 | 14.7  | 15.77 | 14.98 | 18.06 | 19.1  | 0.42  | 3.1   | 1.8    | 4.59   |
| PPUTLS46_014134 | NUDIX hydrolase                                  | 14.4  | 15.92 | 11.89 | 13.31 | 13.54 | 11.48 | -0.69 | -1.08 | 1.4    | 1.63   |
| PPUTLS46_025348 | ABC transporter-like protein                     | 14.23 | 15.63 |       |       | 15.89 | 15.81 |       | 0.22  | 1.86   | 1.17   |
| PPUTLS46_012993 | acetyl-CoA acetyltransferase                     | 14.18 | 15.54 | 15.19 | 15.66 | 23.47 | 22.62 | 0.55  | 6.72  | 0.58   | 6.46   |
| PPUTLS46_020601 | hypothetical protein                             | 14.14 | 14.07 |       |       |       |       |       |       | 13.8   | 16.35  |
| PPUTLS46_010259 | alkyl hydroperoxide reductase subunit F          | 13.94 | 15.49 |       |       | 16.86 | 14.89 |       | 0.47  | 1.9    | 1.25   |
| PPUTLS46_019951 | DNA polymerase III subunits gamma and tau        | 13.85 | 16.39 |       |       |       |       |       |       | 1.22   | 1.35   |
| PPUTLS46_017054 | histone family protein DNA-binding protein       | 13.75 | 13.12 | 17.38 | 13.94 | 13.09 | 16.1  | 0.15  | 0.07  | 1.05   | 0.98   |
| PPUTLS46_021926 | FAD dependent oxidoreductase                     | 13.57 | 15.7  | 16.27 | 15.64 |       |       | 0.38  |       | 1.22   | 1.77   |
| PPUTLS46_014714 | 16.7 kDa protein in recA 5' region               | 13.54 | 14.76 | 14.74 | 14.68 | 12.6  | 14.46 | 0.18  | -1.29 | 0.85   | 0.22   |
| PPUTLS46_005476 | histidine ammonia-lyase                          | 13.11 | 15.92 |       |       |       |       |       |       | 1.4    | 1.51   |
| PPUTLS46_014609 | DNA polymerase III subunit alpha                 | 13.02 | 17.05 |       |       |       |       |       |       | 1.02   | 1.06   |
| PPUTLS46_019231 | PAS/PAC sensor hybrid histidine kinase           | 11.9  | 11.37 |       |       |       |       |       |       | 54.68  | 50.98  |
| PPUTLS46_005596 | poly-(hydroxyalkanoate) granule-associated       |       |       | 23.14 | 22.56 | 23.71 | 23.31 |       |       | 31.06  | 35.2   |
| PPUTLS46_007649 | 3-oxoacid CoA-transferase, B subunit             |       |       |       |       | 22.27 | 22.53 |       |       |        | 19.09  |
| PPUTLS46_000635 | Dihydrodipicolinate synthetase                   |       |       |       |       | 19.99 | 21.18 |       |       |        | 3.96   |
| PPUTLS46_006576 | dehydratase                                      |       | 20.24 | 19.13 |       | 19.45 | 18.31 |       |       | 4.96   | 2.83   |
| PPUTLS46_018416 | hypothetical protein                             |       |       |       |       | 18.95 | 19.7  |       |       |        | 3.94   |
| PPUTLS46_011580 | phosphoglycerate mutase                          |       |       |       |       | 18.82 | 19.07 |       |       |        | 7.35   |
| PPUTLS46_025911 | amino acid transporter LysE                      |       |       |       |       | 18.59 | 17.76 |       |       |        | 2.65   |
| PPUTLS46_009959 | hypothetical protein                             |       |       |       |       | 18.51 | 16.7  |       |       |        | 0.86   |
| PPUTLS46_003412 | acetoacetyl-CoA synthetase                       |       | 17.87 | 16.83 |       | 18.08 | 17.2  |       |       | 1.47   | 1.51   |
| PPUTLS46_009944 | protein Yhgl                                     |       |       |       |       | 17.97 | 17.47 |       |       |        | 3.2    |
| PPUTLS46_015219 | cell division topological specificity factor     |       | 18.34 | 17.79 |       | 17.89 | 17.07 |       |       | 8.25   | 1.32   |
| PPUTLS46_003502 | OmpA domain-containing protein                   |       |       |       |       | 17.81 | 15.41 |       |       |        | 0.67   |
| PPUTLS46_024458 | dithiobiotin synthetase                          |       | 18.67 | 16.59 |       | 17.76 | 17.1  |       |       | 0.96   | 1.52   |
| PPUTLS46_007714 | GMC oxidoreductase                               |       |       |       |       | 17.65 | 16.03 |       |       |        | 0.63   |
| PPUTLS46_007724 | glycosyl transferase                             |       | 19.58 | 18.68 |       | 17.51 | 17.95 |       |       | 5.55   | 2.24   |
| PPUTLS46_018171 | alpha/beta hydrolase fold family protein         |       |       |       |       | 17.35 | 17.51 |       |       |        | 2.73   |
| PPUTLS46_003357 | hypothetical protein                             |       |       |       |       | 17.27 | 16.93 |       |       |        | 1.46   |
| PPUTLS46_017694 | glucose dehydrogenase                            |       |       |       |       | 17.25 | 16.18 |       |       |        | 0.65   |
| PPUTLS46_021841 | secretion protein HlyD family protein            |       | 15.73 | 14.51 |       | 17.15 | 14.41 |       |       | 2.08   | 0.89   |
| PPUTLS46_000640 | class II aldolase/adducin domain protein         |       |       |       |       | 16.95 | 17.96 |       |       |        | 1.06   |
| PPUTLS46_017954 | Uncharacterized conserved protein                |       | 17.63 | 18.55 |       | 16.93 | 16.29 |       |       | 1.61   | 0.91   |
| PPUTLS46_025198 | taurine ABC transporter periplasmic binding      |       | 18.86 | 18.47 |       | 16.86 | 15.5  |       |       | 44.42  | 1.02   |
| PPUTLS46_014664 | S-formylglutathione hydrolase                    |       | 17.78 | 18.89 |       | 16.69 | 17.48 |       |       | 1.64   | 0.88   |
| PPUTLS46_000470 | Uncharacterized protein conserved in bacteria    |       |       |       |       | 16.6  | 14.81 |       |       |        | 1.2    |
| PPUTLS46_025213 | taurine dioxygenase                              |       |       |       |       | 16.47 | 15.23 |       |       |        | 1.45   |
| PPUTLS46_004154 | cmaX protein                                     |       | 16.36 | 15.94 |       | 16.34 | 15.55 |       |       | 5.61   | 2.12   |
| PPUTLS46_016864 | glucose-6-phosphate 1-dehydrogenase              |       |       |       |       | 16.33 | 14.64 |       |       |        | 1.43   |
| PPUTLS46_021236 | hypothetical protein                             |       | 17.25 | 15.45 |       | 16.27 | 15.13 |       |       | 0.61   | 1.77   |
| PPUTLS46_012818 | OmpA/MotB domain-containing protein              |       | 15.09 | 15.7  |       | 16.27 | 16.96 |       |       | 1.68   | 0.95   |
| PPUTLS46_010304 | gamma-glutamylputrescine oxidoreductase          |       | 16.22 | 14.89 |       | 16.24 | 15.41 |       |       | 1.37   | 2.24   |
| PPUTLS46_015504 | Glycosyltransferase                              |       |       |       |       | 16.17 | 15.6  |       |       |        | 3.28   |
| PPUTLS46_000560 | 3-carboxymuconate cyclase                        |       | 18.57 | 18.22 |       | 16.02 | 15.17 |       |       | 135.81 | 2.62   |
| PPUTLS46_007659 | XRE family transcriptional regulator             |       | 16.05 | 15.07 |       | 15.38 | 13.61 |       |       | 1.98   | 2.16   |
| PPUTLS46_020186 | D-isomer specific 2-hydroxyacid dehydrogenase,   |       |       |       |       | 15.38 | 14.99 |       |       |        | 9.41   |
| PPUTLS46_015229 | septum formation inhibitor                       |       | 15.05 | 14.05 |       | 15.25 | 18.04 |       |       | 3.72   | 0.74   |
| PPUTLS46_000100 | hypothetical protein                             |       |       |       |       | 15.17 | 14.8  |       |       |        | 11.44  |
| PPUTLS46_012725 | pirin domain-containing protein                  |       |       |       |       | 15.16 | 16.99 |       |       |        | 0.94   |
| PPUTLS46_024178 | Lipoate-protein ligase A                         |       |       |       |       | 15.03 | 15.85 |       |       |        | 2.24   |
| PPUTLS46_000105 | hypothetical protein                             |       | 17.52 | 17.02 |       | 15    | 15.02 |       |       | 5.24   | 16.23  |
| PPUTLS46_005946 | Glycosyltransferase                              |       | 16.83 | 15.52 |       | 14.81 | 15.93 |       |       | 0.76   | 1.84   |
| PPUTLS46_024123 | anhydro-N-acetylmuramic acid kinase              |       |       |       |       | 14.73 | 16.03 |       |       |        | 1.64   |
| PPUTLS46_003642 | hypothetical protein                             |       |       |       |       | 14.73 | 16.45 |       |       |        | 1.22   |
| PPUTLS46_006591 | peptidase S16, Ion domain-containing protein     |       |       |       |       | 14.37 | 14.51 |       |       |        | 12.15  |
| PPUTLS46_006431 | branched-chain amino acid ABC transporter        |       | 22.35 | 21.89 |       |       |       |       |       | 51.5   |        |
| PPUTLS46_019196 | Uncharacterized conserved protein                |       | 21.09 | 20.81 |       |       |       |       |       | 108.31 |        |
| PPUTLS46_017814 | ammonium transporter                             |       | 20.68 | 20.6  |       |       |       |       |       | 20.1   |        |
| PPUTLS46_001002 | methyl-accepting chemotaxis sensory transducer   |       | 19.94 | 19.86 |       |       |       |       |       | 16.47  |        |
| PPUTLS46_024503 | amino acid-binding ACT domain-containing protein |       | 19.67 | 17.93 |       |       |       |       |       | 2.05   |        |
| PPUTLS46_001317 | polyphosphate kinase 2, PA0141 family            |       | 19.66 | 18.84 |       |       |       |       |       | 6.76   |        |
| PPUTLS46_016979 | phosphate binding protein                        |       | 19.64 | 18.45 |       |       |       |       |       | 3.59   |        |
| PPUTLS46_012120 | 4-alpha-glucanotransferase                       |       | 19.53 | 18.66 |       |       |       |       |       | 5.82   |        |
| PPUTLS46_013438 | cytochrome b/b6 domain-containing protein        |       | 19.5  | 18.26 |       |       |       |       |       | 3.19   |        |
| PPUTLS46_004199 | nitrate-binding protein NasS                     |       | 19.4  | 18.97 |       |       |       |       |       | 32.37  |        |
| PPUTLS46_009729 | 2-methylcitrate dehydratase                      |       | 19.33 | 18.35 |       |       |       |       |       | 4.36   |        |
| PPUTLS46_013358 | amino acid ABC transporter ATP-binding protein   |       | 19.17 | 18.79 |       |       |       |       |       | 59.68  |        |
| PPUTLS46_019201 | Uncharacterized protein conserved in bacteria    |       | 19.07 | 19.61 |       |       |       |       |       | 3.96   |        |
| PPUTLS46_006426 | Inner-membrane translocator                      |       | 18.94 | 18.43 |       |       |       |       |       | 14.29  |        |
| PPUTLS46_001577 | malate dehydrogenase                             |       | 18.91 | 18.27 |       |       |       |       |       | 8.12   |        |
| PPUTLS46_001322 | isochorismatase hydrolase                        |       | 18.8  | 16.76 |       |       |       |       |       | 1.07   |        |
| PPUTLS46_023598 | hemerythrin HHE cation binding domain-containing |       | 18.77 | 18.86 |       |       |       |       |       | 6.57   |        |
| PPUTLS46_009524 | extracellular solute-binding protein, family 1   |       | 18.77 | 17.23 |       |       |       |       |       | 1.58   |        |

|                 |                                                  |       |       |        |
|-----------------|--------------------------------------------------|-------|-------|--------|
| PPUTLS46_023378 | Domain of unknown function (DUF4136)             | 18.59 | 19.63 | 2.36   |
| PPUTLS46_013803 | NAD-dependent epimerase/dehydratase              | 18.34 | 17.93 | 23.24  |
| PPUTLS46_005651 | bifunctional pyrimidine regulatory protein PyrR  | 18.34 | 17.87 | 13.41  |
| PPUTLS46_026466 | extracellular solute-binding protein             | 18.14 | 17.34 | 3.11   |
| PPUTLS46_002712 | quinoxinone amine dehydrogenase, beta            | 18.05 | 15.45 | 0.61   |
| PPUTLS46_009589 | Phage terminase, small subunit                   | 18.05 | 16.74 | 1.2    |
| PPUTLS46_020386 | anti-sigma-factor antagonist                     | 17.96 | 17.59 | 35.92  |
| PPUTLS46_006411 | ABC transporter related protein                  | 17.87 | 15.89 | 0.64   |
| PPUTLS46_010924 | major facilitator superfamily transporter        | 17.87 | 16.79 | 1.39   |
| PPUTLS46_007186 | ribosome-binding factor A                        | 17.71 | 17.39 | 145.98 |
| PPUTLS46_005931 | glycosyl transferase, group 1                    | 17.7  | 16.24 | 0.74   |
| PPUTLS46_016914 | ABC transporter, periplasmic polyamine-binding   | 17.67 | 18.54 | 1.69   |
| PPUTLS46_010934 | glyoxalase/bleomycin resistance protein/dioxygen | 17.66 | 16.3  | 0.77   |
| PPUTLS46_013348 | amino acid ABC transporter permease              | 17.52 | 17.53 | 3.54   |
| PPUTLS46_023201 | alkaline phosphatase                             | 17.52 | 15.88 | 0.6    |
| PPUTLS46_014099 | TonB-dependent receptor                          | 17.49 | 17.08 | 10.67  |
| PPUTLS46_002172 | SCP-like extracellular protein                   | 17.48 | 17.55 | 3      |
| PPUTLS46_005951 | hypothetical protein                             | 17.48 | 15.15 | 0.61   |
| PPUTLS46_005401 | signal transduction histidine kinase, nitrogen   | 17.39 | 15.43 | 0.6    |
| PPUTLS46_022286 | membrane carboxypeptidase                        | 17.34 | 15.96 | 0.59   |
| PPUTLS46_022576 | arginine/ornithine antiporter                    | 17.33 | 17.59 | 1.98   |
| PPUTLS46_006416 | ABC transporter-like protein                     | 17.31 | 17.52 | 2.04   |
| PPUTLS46_018361 | glyoxalase/bleomycin resistance protein/dioxygen | 17.23 | 18.01 | 1.32   |
| PPUTLS46_007321 | Regulator of competence-specific genes           | 17.16 | 17.82 | 1.32   |
| PPUTLS46_020801 | P pilus assembly/Cpx signaling pathway,          | 17.1  | 18.14 | 1.14   |
| PPUTLS46_023538 | ethanolamine transporter                         | 17.07 | 16.42 | 0.86   |
| PPUTLS46_012903 | tRNA (uracil-5-)-methyltransferase               | 17.07 | 15.66 | 0.62   |
| PPUTLS46_018571 | urease subunit alpha                             | 17.04 | 15.74 | 0.61   |
| PPUTLS46_012065 | phenylhydantoinase                               | 17.02 | 16.41 | 0.81   |
| PPUTLS46_020061 | Nucleoside-binding outer membrane protein        | 17.02 | 15.31 | 0.68   |
| PPUTLS46_004539 | type IV pilus assembly PilZ                      | 17.01 | 16.96 | 1.99   |
| PPUTLS46_025123 | ribosomal protein S6 modification protein        | 16.98 | 15.95 | 0.58   |
| PPUTLS46_012045 | Lipocalin family protein                         | 16.98 | 15.82 | 0.62   |
| PPUTLS46_003317 | Protein of unknown function (DUF3455)            | 16.96 | 15.78 | 0.64   |
| PPUTLS46_013888 | alpha/beta hydrolase fold protein                | 16.95 | 17.15 | 1.31   |
| PPUTLS46_005146 | Domain of unknown function (DUF4426)             | 16.93 | 15.9  | 0.62   |
| PPUTLS46_021066 | activator of Hsp90 ATPase 1 family protein       | 16.86 | 16.38 | 0.62   |
| PPUTLS46_020401 | flagellar assembly protein H                     | 16.77 | 17.17 | 0.94   |
| PPUTLS46_004194 | response regulator receiver and ANTAR domain     | 16.77 | 16.66 | 1.12   |
| PPUTLS46_023743 | ABC transporter related protein                  | 16.76 | 16.58 | 1.23   |
| PPUTLS46_020366 | flagellar basal body-associated protein FlIL     | 16.68 | 16.47 | 0.98   |
| PPUTLS46_012095 | glucose-6-phosphate 1-dehydrogenase              | 16.67 | 16.47 | 0.91   |
| PPUTLS46_000275 | aminodeoxychorismate lyase                       | 16.64 | 15.5  | 0.93   |
| PPUTLS46_016564 | Beta-lactamase domain protein                    | 16.55 | 16.78 | 0.72   |
| PPUTLS46_007301 | periplasmic binding protein                      | 16.52 | 15.55 | 1.16   |
| PPUTLS46_016919 | histone deacetylase superfamily protein          | 16.48 | 15.18 | 1.09   |
| PPUTLS46_007699 | Lipid A core - O-antigen ligase and related      | 16.47 | 15.29 | 1.14   |
| PPUTLS46_023076 | multidrug efflux protein                         | 16.43 | 15.48 | 1.31   |
| PPUTLS46_017824 | HAD family hydrolase                             | 16.43 | 12.59 | 0.93   |
| PPUTLS46_007829 | UspA domain-containing protein                   | 16.32 | 15.7  | 2.39   |
| PPUTLS46_002152 | LysR family transcriptional regulator            | 16.3  | 17.07 | 0.66   |
| PPUTLS46_015724 | methyl-accepting chemotaxis sensory transducer   | 16.3  | 16.74 | 0.67   |
| PPUTLS46_014249 | YaeQ family protein                              | 16.22 | 15.4  | 1.95   |
| PPUTLS46_026186 | glutathione S-transferase                        | 16.21 | 14.26 | 1.16   |
| PPUTLS46_023503 | MORN repeat-containing protein                   | 16.2  | 15.96 | 6.61   |
| PPUTLS46_020286 | flagellar motor protein                          | 16.16 | 14.11 | 1.18   |
| PPUTLS46_002272 | PAS/PAC sensor hybrid histidine kinase           | 16.09 | 15.52 | 3.93   |
| PPUTLS46_019261 | beta-lactamase domain-containing protein         | 16.08 | 16.68 | 0.7    |
| PPUTLS46_021996 | Uncharacterized protein conserved in bacteria    | 16.07 | 15.74 | 30     |
| PPUTLS46_008949 | Predicted ATP-dependent endonuclease of the OLD  | 15.81 | 15.9  | 2.19   |
| PPUTLS46_004499 | LoiC/E family lipoprotein releasing system,      | 15.77 | 16.24 | 1.1    |
| PPUTLS46_017754 | putative restriction endonuclease R.Xmal         | 15.74 | 15.44 | 36.25  |
| PPUTLS46_019681 | amino acid ABC transporter periplasmic protein   | 15.68 | 14.51 | 2.23   |
| PPUTLS46_012848 | Uncharacterized protein conserved in bacteria    | 15.67 | 15.98 | 1.59   |
| PPUTLS46_023358 | dehydratase                                      | 15.66 | 15.43 | 12.58  |
| PPUTLS46_013593 | multi-sensor signal transduction histidine       | 15.66 | 14.94 | 3.99   |
| PPUTLS46_002372 | helix-turn-helix domain-containing protein       | 15.6  | 13.62 | 1.56   |
| PPUTLS46_017334 | CDF family cobalt/cadmium/zinc transporter       | 15.57 | 16.65 | 0.76   |
| PPUTLS46_005836 | lipoprotein                                      | 15.31 | 15.87 | 1.52   |
| PPUTLS46_025906 | GAF sensor hybrid histidine kinase               | 15.24 | 16.08 | 1.16   |
| PPUTLS46_021196 | Protein of unknown function (DUF2937)            | 15.18 | 14.97 | 15.83  |
| PPUTLS46_022401 | membrane-bound lytic transglycosylase F          | 15.1  | 14.3  | 4.87   |
| PPUTLS46_005486 | imidazolonepropionase                            | 15.09 | 14.24 | 4.48   |
| PPUTLS46_009239 | diguanylate cyclase                              | 14.89 | 14.97 | 5.03   |
| PPUTLS46_011840 | polysaccharide deacetylase                       | 14.81 | 15.21 | 2.72   |
| PPUTLS46_026451 | alpha/beta hydrolase                             | 14.69 | 15.35 | 2.05   |
| PPUTLS46_004996 | haloacid dehalogenase-like hydrolase             | 14.69 | 14.48 | 21.03  |
| PPUTLS46_000050 | histidine kinase                                 | 14.61 | 14.73 | 5.25   |
| PPUTLS46_004494 | lipoprotein transporter ATP-binding subunit      | 14.56 | 15.34 | 1.91   |
| PPUTLS46_004244 | deoxyguanosinetriphosphate                       | 14.36 | 13.68 | 8.99   |
| PPUTLS46_024563 | lipopolysaccharide kinase                        | 14.3  | 14.18 | 13.82  |
| PPUTLS46_024248 | PAS/PAC sensor signal transduction histidine     | 14.12 | 12.91 | 4.29   |
| PPUTLS46_021181 | LamB/YcsF family protein                         | 14    | 14.87 | 2.28   |
| PPUTLS46_016649 | FOF1 ATP synthase subunit A                      | 13.93 | 12.66 | 4.31   |
| PPUTLS46_006786 | cation diffusion facilitator family transporter  | 13.66 | 12    | 3.5    |

|                 |                                             |       |       |        |
|-----------------|---------------------------------------------|-------|-------|--------|
| PPUTLS46_020581 | 2-oxoisovalerate dehydrogenase subunit beta | 13.64 | 16.22 | 0.94   |
| PPUTLS46_016724 | Protein of unknown function (DUF1329)       | 13.64 | 14.85 | 1.97   |
| PPUTLS46_025333 | SPFH domain, Band 7 family protein          | 13.45 | 13.1  | 244.15 |
| PPUTLS46_004986 | dihydrofolate reductase                     | 13.44 | 16.08 | 0.98   |
| PPUTLS46_015039 | GntR family transcriptional regulator       | 13.35 | 14.3  | 2.72   |
| PPUTLS46_023458 | 3-dehydroquinate dehydratase                | 13.11 | 16.75 | 0.81   |
| PPUTLS46_018256 | sensor histidine kinase                     | 13.1  | 15.61 | 1.16   |
| PPUTLS46_022111 | endonuclease III                            | 13.1  | 12.51 | 17.96  |
| PPUTLS46_007459 | hypothetical protein                        | 12.46 | 13.25 | 4.14   |
| PPUTLS46_012545 | lysine decarboxylase                        | 12    | 12.01 | 16.5   |

---
