# Supplementary material for: Quantitative ‘Omics Analyses of Medium Chain Length Polyhydroxyalkanaote Metabolism in Pseudomonas putida LS46 Cultured with Waste Glycerol and Waste Fatty Acids
Source: PubMed Central journal article supplement (PMC4636370; doi:10.1371/journal.pone.0142322), 2015-11-06
Supplement: pone.0142322.s004.pdf [file pone.0142322.s004.pdf]

**S2 Table. Numbers of significantly up- and down-regulated genes and gene products in specific COG groups under the specific growth conditions <sup>a</sup>.**

| COG Group | Description                                                  | Waste glycerol<br>Sta vs Exp |      |         |      | WFA vs WG<br>Exp |      |         |      |
|-----------|--------------------------------------------------------------|------------------------------|------|---------|------|------------------|------|---------|------|
|           |                                                              | RNA                          |      | Protein |      | RNA              |      | Protein |      |
|           |                                                              | Up                           | Down | Up      | Down | Up               | Down | Up      | Down |
| K         | Transcription                                                | 9                            | 6    | 1       | 5    | 5                | 9    | 0       | 2    |
| C         | Energy production and conversion                             | 12                           | 36   | 6       | 10   | 14               | 19   | 8       | 8    |
| O         | Posttranslational modification, protein turnover, chaperones | 2                            | 6    | 0       | 3    | 4                | 2    | 0       | 0    |
| H         | Coenzyme transport and metabolism                            | 5                            | 4    | 0       | 2    | 3                | 5    | 0       | 0    |
| J         | Translation, ribosomal structure and biogenesis              | 3                            | 0    | 0       | 2    | 6                | 0    | 1       | 4    |
| R         | General function prediction only                             | 14                           | 9    | 4       | 5    | 18               | 20   | 5       | 4    |
| G         | Carbohydrate transport and metabolism                        | 3                            | 10   | 5       | 3    | 4                | 17   | 1       | 7    |
| M         | Cell wall/membrane/envelope biogenesis                       | 4                            | 14   | 3       | 1    | 8                | 6    | 2       | 3    |
| T         | Signal transduction mechanisms                               | 11                           | 9    | 6       | 2    | 7                | 9    | 1       | 3    |
| P         | Inorganic ion transport and metabolism                       | 14                           | 33   | 6       | 2    | 10               | 13   | 0       | 1    |
| S         | Function unknown                                             | 17                           | 9    | 8       | 2    | 12               | 11   | 4       | 3    |
| E         | Amino acid transport and metabolism                          | 29                           | 23   | 10      | 2    | 16               | 17   | 4       | 6    |
| I         | Lipid transport and metabolism                               | 2                            | 3    | 0       | 0    | 19               | 6    | 12      | 1    |
| Q         | Secondary metabolites biosynthesis, transport & catabolism   | 4                            | 3    | 2       | 2    | 7                | 11   | 2       | 1    |
| N         | Cell motility                                                | 11                           | 6    | 2       | 2    | 3                | 7    | 1       | 1    |
| Total     |                                                              | 144                          | 175  | 50      | 45   | 141              | 159  | 31      | 30   |

<sup>a</sup>: WG, Waste glycerol cultures; WFA, Waste fatty acid cultures; Exp, Exponential phase; Sta, Stationary phase
