# Supplementary material for: Quantitative ‘Omics Analyses of Medium Chain Length Polyhydroxyalkanaote Metabolism in Pseudomonas putida LS46 Cultured with Waste Glycerol and Waste Fatty Acids
Source: PubMed Central journal article supplement (PMC4636370; doi:10.1371/journal.pone.0142322), 2015-11-06
Supplement: pone.0142322.s005.pdf [file pone.0142322.s005.pdf]

**S3 Table. Monomer composition of mcl-PHA synthesized by *P. putida* LS46 grown on biodiesel- derived waste glycerol (WG) and waste fatty acid (WFA) cultures.**

| Conditions        | Monomer composition (mol%) <sup>a</sup> |             |             |             |             |             |             |             |
|-------------------|-----------------------------------------|-------------|-------------|-------------|-------------|-------------|-------------|-------------|
|                   | C6                                      | C8          | C9          | C10         | C12         | C12:1       | C14         | C14:1       |
| waste glycerol    | 2.69 ± 0.07                             | 24.4 ± 0.53 | nd          | 65.5 ± 0.41 | 2.42 ± 0.37 | 4.55 ± 0.32 | 0.39 ± 0.02 | nd          |
| waste fatty acids | 4.38 ± 0.11                             | 55.2 ± 0.61 | 1.02 ± 0.12 | 32.5 ± 0.30 | 5.1 ± 0.25  | 0.99 ± 0.01 | 0.71 ± 0.14 | 1.91 ± 0.11 |

<sup>a</sup>: Unsaturated monomers were determined via GC/MS with 2 mass unit smaller than their saturated 3-hydroxyalkanoic acid standards
