# Supplementary material for: Quantitative ‘Omics Analyses of Medium Chain Length Polyhydroxyalkanaote Metabolism in Pseudomonas putida LS46 Cultured with Waste Glycerol and Waste Fatty Acids
Source: PubMed Central journal article supplement (PMC4636370; doi:10.1371/journal.pone.0142322), 2015-11-06
Supplement: pone.0142322.s006.pdf [file pone.0142322.s006.pdf]

**S4 Table. Summary of RNA (Rnet) and protein (Pnet) scores from the RNAseq and 1D proteomic analyses under three experimental conditions <sup>a</sup>.**

| Protein scores                |                 |                |                        |                                 |                                 |                                  | RNA scores                 |
|-------------------------------|-----------------|----------------|------------------------|---------------------------------|---------------------------------|----------------------------------|----------------------------|
| Growth Condition <sup>a</sup> | MS/MS collected | Total peptides | Non-redundant peptides | Proteins (log) <sub>e</sub> <-1 | Proteins (log) <sub>e</sub> <-3 | Proteins (log) <sub>e</sub> <-10 | Number of genes identified |
| WG_Exp_Rep1                   | 33864           | 19928          | 8315                   | 1947                            | 1830                            | 1377                             | 5193                       |
| WG_Exp_Rep2                   | 34996           | 17941          | 7431                   | 1836                            | 1714                            | 1285                             | 5189                       |
| WG_Sta_Rep1                   | 36092           | 21644          | 9787                   | 1997                            | 1906                            | 1500                             | 5204                       |
| WG_Sta_Rep2                   | 35168           | 20533          | 9503                   | 1975                            | 1873                            | 1456                             | 5198                       |
| WFA_Exp_Rep1                  | 36081           | 20922          | 8817                   | 1829                            | 1718                            | 1333                             | 5199                       |
| WFA_Exp_Rep1                  | 36587           | 20982          | 8844                   | 1825                            | 1713                            | 1330                             | 5195                       |
| <b>Average (Proteins)</b>     |                 |                |                        | <b>Average (RNA)</b>            |                                 |                                  |                            |
|                               |                 |                | WG_Exp                 | 1891                            | 1772                            | 1331                             | 5191                       |
|                               |                 |                | WG_Sta                 | 1916                            | 1810                            | 1478                             | 5201                       |
|                               |                 |                | WFA_Exp                | 1827                            | 1715                            | 1331                             | 5197                       |

<sup>a</sup>: WG: Waste glycerol; WFA: waste fatty acids; Exp: exponential phase; Sta: stationary phase; Rep1/2: biological replicate 1 and 2.
