# Supplementary material for: Quantitative ‘Omics Analyses of Medium Chain Length Polyhydroxyalkanaote Metabolism in Pseudomonas putida LS46 Cultured with Waste Glycerol and Waste Fatty Acids
Source: PubMed Central journal article supplement (PMC4636370; doi:10.1371/journal.pone.0142322), 2015-11-06
Supplement: pone.0142322.s007.pdf [file pone.0142322.s007.pdf]

**S5 Table. Overall biological signal to systematic noise ratio of RNAseq and Proteomic analyses under three experimental conditions <sup>a</sup>.**

|                   | Comparisons <sup>a</sup>     | Standard Deviation |         |
|-------------------|------------------------------|--------------------|---------|
|                   |                              | RNA                | Protein |
| Biological signal | WG_Sta_Rep1 vs WG_Exp_Rep1   | 1.22               | 1.53    |
|                   | WG_Sta_Rep2 vs WG_Exp_Rep2   | 1.1                | 1.52    |
|                   | WFA_Exp_Rep1 vs WG_Exp_Rep1  | 1.01               | 1.59    |
|                   | WFA_Exp_Rep2 vs WG_Exp_Rep2  | 1.01               | 1.53    |
| System noise      | WG_Exp_Rep1 vs WG_Exp_Rep2   | 0.27               | 1.1     |
|                   | WG_Sta_Rep1 vs WG_Sta_Rep2   | 0.51               | 0.81    |
|                   | WFA_Exp_Rep1 vs WFA_Exp_Rep2 | 0.28               | 1.03    |
| Average ratio     |                              | 3.48               | 1.55    |

a: WG: Waste glycerol; WFA: waste fatty acids; Exp: exponential phase; Sta: stationary phase; Rep1/2: biological replicate 1 and 2.
