# Supplementary material for: Quantitative ‘Omics Analyses of Medium Chain Length Polyhydroxyalkanaote Metabolism in Pseudomonas putida LS46 Cultured with Waste Glycerol and Waste Fatty Acids
Source: PubMed Central journal article supplement (PMC4636370; doi:10.1371/journal.pone.0142322), 2015-11-06
Supplement: pone.0142322.s008.pdf [file pone.0142322.s008.pdf]

**S6 Table. Variation in expression values of putative fatty acid de novo synthesis genes and gene products in of *P. putida* LS46 under two growth conditions.**

| Locus Tag       | Gene Symbol | Gene Annotation                                                | DNA Seq Length (nt) | R <sup>a</sup> | P <sup>a</sup> | Waste glycerol Sta vs Exp |       | Waste fatty acid vs Waste glycerol (Exp) |       |
|-----------------|-------------|----------------------------------------------------------------|---------------------|----------------|----------------|---------------------------|-------|------------------------------------------|-------|
|                 |             |                                                                |                     |                |                | Rnet                      | Pnet  | Rnet                                     | Pnet  |
| PPUTLS46_000255 | fabG 1      | 3-ketoacyl-(acyl-carrier-protein) reductase                    | 741                 | 12.6           | 20.1           | 0.23                      | 0.01  | -0.5                                     | -0.06 |
| PPUTLS46_002112 | fadG        | short-chain dehydrogenase/reductase SDR                        | 741                 | 6.25           | nr             | 0.28                      | nc    | 0.06                                     | nc    |
| PPUTLS46_011825 | fadG        | short-chain dehydrogenase/reductase SDR                        | 765                 | 8.28           | nr             | 0.25                      | nc    | -0.19                                    | nc    |
| PPUTLS46_011830 | fadG        | 3-oxoacyl-ACP reductase                                        | 762                 | 7.16           | nr             | 0.68                      | nc    | 0.02                                     | nc    |
| PPUTLS46_018726 | fadG        | short-chain dehydrogenase/reductase SDR                        | 765                 | 6.3            | nr             | -0.07                     | nc    | -0.66                                    | nc    |
| PPUTLS46_018731 | fadG        | 3-oxoacyl-ACP reductase                                        | 738                 | 6.46           | nr             | -0.51                     | nc    | -1.6                                     | nc    |
| PPUTLS46_023353 | fabG 2      | 3-ketoacyl-(acyl-carrier-protein) reductase                    | 1353                | 11.3           | 17.7           | -1.39                     | 1.82  | -2.24                                    | -0.3  |
| PPUTLS46_015924 | fabG 3      | 3-ketoacyl-(acyl-carrier-protein) reductase                    | 750                 | 10.1           | 19.5           | -0.59                     | -0.43 | -0.47                                    | 0.45  |
| PPUTLS46_000265 | fabF        | 3-oxoacyl-(acyl carrier protein) synthase II                   | 1245                | 12.1           | 18.3           | 1.05                      | -0.14 | 0.83                                     | 0.23  |
| PPUTLS46_012710 | fabA        | 3-hydroxydecanoyl-(acyl carrier protein) dehydratase           | 516                 | 11.7           | 17.4           | 1.13                      | 1.42  | 1.44                                     | 0.07  |
| PPUTLS46_012715 | fabB        | 3-oxoacyl-(acyl carrier protein) synthase I                    | 1221                | 13.5           | 20.3           | 0.46                      | -0.49 | 0.79                                     | 0.03  |
| PPUTLS46_012998 | fabV        | trans-2-enoyl-CoA reductase                                    | 1212                | 12.1           | 21.2           | 0.44                      | -0.19 | 1.8                                      | 0.04  |
| PPUTLS46_014589 | fabZ        | (3R)-hydroxymyristoyl-ACP dehydratase                          | 441                 | 11.1           | 19.6           | -0.39                     | -0.8  | nc                                       | nc    |
| PPUTLS46_020461 | fabH        | 3-oxoacyl-ACP synthase                                         | 930                 | nr             | nr             | nc                        | nc    | nc                                       | nc    |
| PPUTLS46_000250 | fabD        | malonyl CoA-acyl carrier protein transacylase                  | 885                 | 12             | 18.6           | -0.02                     | 1.37  | -0.05                                    | -0.87 |
| PPUTLS46_023463 |             | acetyl-CoA carboxylase biotin carboxyl carrier protein subunit | 462                 | 11.5           | 21.7           | -0.3                      | -0.92 | 0.85                                     | -1.22 |
| PPUTLS46_023468 |             | acetyl-CoA carboxylase biotin carboxylase subunit              | 1356                | 13.9           | 22.3           | -0.64                     | 0.09  | 0.54                                     | -0.02 |
| PPUTLS46_000435 |             | acetyl-CoA carboxylase subunit beta                            | 894                 | nr             | nr             | nc                        | nc    | nc                                       | nc    |
| PPUTLS46_014614 |             | acetyl-CoA carboxylase carboxyltransferase subunit alpha       | 948                 | 12.3           | 20.7           | 0.75                      | 0     | 1.12                                     | -0.24 |

<sup>a</sup>: The log2 value of RNA and Protein expression abundance of *P.putida* LS46 grown in waste glycerol culture at 8hrs post-inocula. RNA or Protein that were either not detected or only observed in one biological replicate were not reported for comparative analysis, and therefore no Rnet and Pnet value calculated. nr: not reported. nc: not calculated.

Exp: Exponential culutre; Sta: Stationary culture; Green shading: significantly up-regulated; Red shading: significantly down-regulated.
