# Supplementary material for: Quantitative ‘Omics Analyses of Medium Chain Length Polyhydroxyalkanaote Metabolism in Pseudomonas putida LS46 Cultured with Waste Glycerol and Waste Fatty Acids
Source: PubMed Central journal article supplement (PMC4636370; doi:10.1371/journal.pone.0142322), 2015-11-06
Supplement: pone.0142322.s009.pdf [file pone.0142322.s009.pdf]

**S7 Table. Expression values of putative FadE homologs in *P. putida* LS46 grown in waste fatty acids (WFA) cultures during exponential phase, and variations in their expression levels under two conditions.**

| Locus Tag       | Gene Anotation                                   | DNA Seq Length (nt) | R <sup>a</sup> | P <sup>a</sup> | Waste fatty acid vs Waste glycerol (Exp) |       |
|-----------------|--------------------------------------------------|---------------------|----------------|----------------|------------------------------------------|-------|
|                 |                                                  |                     |                |                | Rnet                                     | Pnet  |
| PPUTLS46_000145 | acyl-CoA dehydrogenase                           | 2448                | 11.1           | 18             | -0.7                                     | 0.15  |
| PPUTLS46_000650 | acyl-CoA dehydrogenase domain-containing protein | 1167                | 7              | nr             | 0.02                                     | nc    |
| PPUTLS46_000700 | acyl-CoA dehydrogenase domain-containing protein | 1776                | 8.5            | nr             | -0.16                                    | 0.08  |
| PPUTLS46_002222 | acyl-CoA dehydrogenase domain-containing protein | 1770                | 7.5            | nr             | 1.26                                     | nc    |
| PPUTLS46_002522 | AcdA                                             | 1152                | 9.6            | 17.6           | 0.46                                     | 0.52  |
| PPUTLS46_005901 | acyl-CoA dehydrogenase                           | 1803                | 10.2           | nr             | 1.89                                     | nc    |
| PPUTLS46_006756 | acyl-CoA dehydrogenase                           | 1653                | 10.8           | 18.7           | -0.33                                    | 0.59  |
| PPUTLS46_007429 | acyl-CoA dehydrogenase domain-containing protein | 1128                | nr             | nr             | nc                                       | nc    |
| PPUTLS46_008099 | acyl-CoA dehydrogenase                           | 1134                | 3.8            | nr             | 0.06                                     | nc    |
| PPUTLS46_010244 | acyl-CoA dehydrogenase                           | 1230                | nr             | nr             | nc                                       | nc    |
| PPUTLS46_012190 | isovaleryl-CoA dehydrogenase                     | 1164                | 9.2            | 17.2           | 0.15                                     | -0.55 |
| PPUTLS46_015999 | glutaryl-CoA dehydrogenase                       | 1182                | 11             | 17.6           | 0.24                                     | 0.09  |
| PPUTLS46_018781 | acyl-CoA dehydrogenase type 2                    | 1188                | 6.3            | nr             | -0.84                                    | nc    |
| PPUTLS46_018861 | type 2 acyl-CoA dehydrogenase                    | 1233                | 5.1            | nr             | 0.59                                     | nc    |
| PPUTLS46_024438 | acyl-CoA dehydrogenase                           | 1779                | nr             | nr             | nc                                       | nc    |
| PPUTLS46_024448 | acyl-CoA dehydrogenase                           | 1806                | 16.6           | 24.3           | 3.25                                     | 3.54  |
| PPUTLS46_025248 | acyl-CoA dehydrogenase type 2                    | 1182                | 4              | nr             | -0.66                                    | nc    |
| PPUTLS46_026101 | acyl-CoA dehydrogenase domain-containing protein | 1161                | 6.4            | nr             | 1.87                                     | nc    |

<sup>a</sup>: The log<sub>2</sub> value of RNA and Protein expression abundance of *P.putida* LS46 grown in waste fatty acid derived culture at 8hrs post-inocula. RNA or Protein that were either not detected or only observed in one biological replicate were not reported for comparative analysis, and therefore no Rnet and Pnet value calculated. nr: not reported. nc: not calculated.

Exp: Exponential culture; Sta: Stationary culture. Green shading: significantly up-regulated.
