# Supplementary material for: Quantitative ‘Omics Analyses of Medium Chain Length Polyhydroxyalkanaote Metabolism in Pseudomonas putida LS46 Cultured with Waste Glycerol and Waste Fatty Acids
Source: PubMed Central journal article supplement (PMC4636370; doi:10.1371/journal.pone.0142322), 2015-11-06
Supplement: pone.0142322.s010.pdf [file pone.0142322.s010.pdf]

**S8 Table. Expression values of putative fatty acid-oxidation genes and gene products in *P. putida* LS46 grown in waste fatty acids (WFA) cultures during exponential phase, and variations in their expression levels under two conditions.**

| Clusters | Locus Tag       | Gene symbol/annotation                | DNA seq length (nt) | R <sup>a</sup> | P <sup>a</sup> | Waste glycerol<br>Sta vs Exp |       | Waste fatty acid<br>vs Waste<br>glycerol (Exp) |       |
|----------|-----------------|---------------------------------------|---------------------|----------------|----------------|------------------------------|-------|------------------------------------------------|-------|
|          |                 |                                       |                     |                |                | Rnet                         | Pnet  | Rnet                                           | Pnet  |
| 1        | PPUTLS46_004399 | fadB                                  | 2148                | 16.1           | 25.5           | 1.54                         | 0.52  | 4.4                                            | 4.65  |
|          | PPUTLS46_004404 | fadA                                  | 1176                | 15.6           | 24.7           | 0.46                         | -0.69 | 3.79                                           | 4.8   |
| 2        | PPUTLS46_007434 | fadB1X                                | 774                 | 9.7            | 20.2           | 0.06                         | 0.02  | -0.33                                          | 0.03  |
|          | PPUTLS46_007429 | fadEx                                 | 1128                | nr             | nr             | nc                           | nc    | nc                                             | nc    |
|          | PPUTLS46_007424 | fadAx                                 | 1194                | nr             | nr             | nc                           | nc    | nc                                             | nc    |
|          | PPUTLS46_007419 | fadB2x                                | 768                 | nr             | nr             | nc                           | nc    | nc                                             | nc    |
|          | PPUTLS46_007414 | fadDx                                 | 1674                | 7.7            | nr             | 1.06                         | nc    | -0.57                                          | nc    |
| 3        | PPUTLS46_000695 | 3-hydroxybutyryl-CoA epimerase        | 1239                | 10.4           | nr             | 1.33                         | nc    | 0.23                                           | nc    |
|          | PPUTLS46_000700 | Acyl-CoA dehydrogenase putative       | 1776                | 8.5            | nr             | 0.08                         | -1.68 | -1.33                                          | nc    |
|          | PPUTLS46_000705 | Alcohol dehydrogenase iron-containing | 1164                | 7.1            | nr             | nc                           | nc    | -1.58                                          | nc    |
|          | PPUTLS46_000710 | Thioesterase superfamily protein      | 453                 | 6              | nr             | -0.01                        | nc    | -0.95                                          | nc    |
|          | PPUTLS46_000715 | Acetyl-CoA acetyltransferase          | 1185                | 8              | nr             | 0.03                         | -1.86 | -1.02                                          | nc    |
| 4        | PPUTLS46_026256 | TetR family transcriptional regulator | 582                 | 9.6            | nr             | -0.04                        | nc    | 1.56                                           | nc    |
|          | PPUTLS46_026251 | 3-hydroxybutyryl-CoA dehydrogenase    | 849                 | 11.1           | 16.7           | nc                           | nc    | 1.73                                           | 2.19  |
|          | PPUTLS46_026246 | beta-ketothiolase                     | 1185                | 11.7           | 20.8           | 0.06                         | 0.47  | 1.66                                           | 1.76  |
| Others   | PPUTLS46_012993 | acetyl-CoA acetyltransferase          | 1179                | 11.8           | 23.1           | -0.6                         | 0.53  | 7.51                                           | 6.7   |
|          | PPUTLS46_003422 | 3-hydroxybutyrate dehydrogenase       | 771                 | 10.81          | 19.24          | nc                           | nc    | 3.84                                           | nc    |
|          | PPUTLS46_006916 | acyl-CoA thioesterase II              | 870                 | 10.05          | 14.51          | -0.2                         | 0.03  | -0.2                                           | -0.39 |
|          | PPUTLS46_009584 | Acyl-CoA thioesterase-like protein    | 798                 | 10.2           | 19.1           | -0.64                        | 0.79  | 0.16                                           | 3.71  |

<sup>a</sup>: The log<sub>2</sub> value of RNA and Protein expression abundance of *P. putida* LS46 grown in waste fatty acid derived culture at 8hrs post-inocula. RNA or Protein that were either not detected or only observed in one biological replicate were not reported for comparative analysis, and therefore no Rnet and Pnet value calculated. nr: not reported. nc: not calculated.

Exp: Exponential culture; Sta: Stationary culture. Green shading: significantly up-regulated; Red shading: significantly down-regulated.
